# Supplementary material for: Catalyst-free synthesis of tetrahydropyrimidines via formal [3+3]-cycloaddition of imines with 1,3,5-hexahydro-1,3,5-triazines
Source: Royal Society of Chemistry journal article supplement (doi:10.1039/c7ra11973a), 2018-01-01

# Catalyst-Free Synthesis of Tetrahydropyrimidines via Formal [3+3]-Cycloaddition of Imines with 1,3,5-Hexahydro-1,3,5-Triazines

Long Chen, Kai Liu and Jiangtao Sun\*

*Jiangsu Key Laboratory of Advanced Catalytic Materials & Technology, School of  
Petrochemical Engineering, Changzhou University  
1 Gehu Road, 213164 Changzhou, China  
E-mail: jtsun08@gmail.com or jtsun@cczu.edu.cn*

## Table of Contents

1. General information
2. Preparation of substrates
- 3 General procedure for Table 2
4. Large scale reaction for Scheme 2
5. Mechanistic studies for Scheme 3
6. X-ray structure of **3j**
7. References
8. <sup>1</sup>H NMR and <sup>13</sup>C NMR Spectra of compounds

## General information

All of the reactions were performed in flame-dried tubes. For column chromatography, 200-300 mesh silica gel was used.  $^1\text{H}$  NMR were recorded on Bruker 300 MHz, 400 MHz spectrometer and  $^{13}\text{C}$  NMR were recorded on Bruker 75 MHz, 100 MHz or 125MHz spectrometer in  $\text{CDCl}_3$ . HRMS were performed on Agilent 6540 Q-TOF mass spectrometer (ESI). Melting points were determined on a SGW X-4B melting point apparatus. Triazines **2** were prepared according to previously reported literature.<sup>[1]</sup>

## Preparation of substrates

Imines **1** were prepared according to the follow procedure.<sup>[2, 3]</sup>

Procedure A:

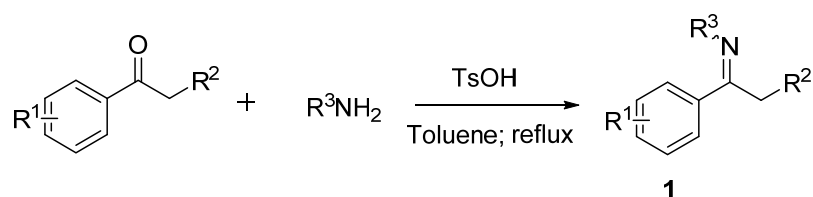

Ketone (10 mmol, 1 eq),  $\text{R}^3\text{NH}_2$  (20 mmol, 2 eq), TsOH (1 mmol, 0.1 eq) and toluene (80 mL) were added into a round-bottom flask, the mixture was heated to reflux overnight under Dean-Stark conditions. The reaction mixture was cooled to room temperature. After evaporating the solvents under reduced pressure, the residue was purified by flash chromatography on silica gel (petroleum ether/ethyl acetate/ $\text{Et}_3\text{N}$ =100:1:2) or crystallization from petroleum ether to afford the imine **1**, which was unstable and used directly to next step.

Procedure B:

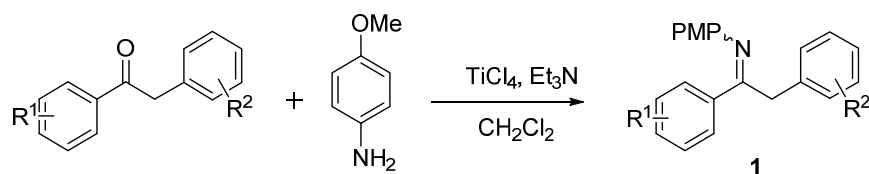

To a solution of 4-Methoxyaniline (27 mmol) and  $\text{Et}_3\text{N}$  (27 mmol) in  $\text{CH}_2\text{Cl}_2$  (70 mL)

was added dropwise  $\text{TiCl}_4$  (1 mL, 9 mmol) at 0 °C under argon atmosphere. After stirring for 30 min, the reaction mixture was allowed to warm to room temperature and a solution of ketone (9 mmol) in  $\text{CH}_2\text{Cl}_2$  (30 mL) was added dropwisely. The reaction mixture was stirred at 40 °C overnight. The reaction mixture was filtered and washed with EtOAc, the filtrate was concentrated under vacuum to give crude product. The crude product was purified by recrystallization to give imine **1**, which was unstable and used directly to next step.

### General procedure for Table 2

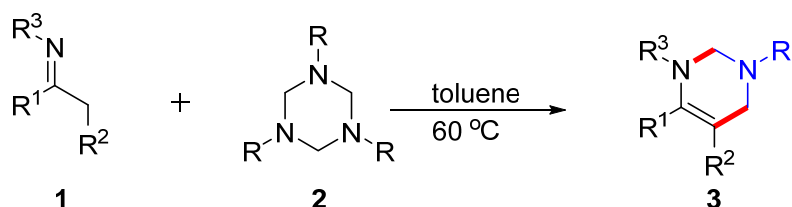

To a tube was added **1** (0.3 mmol, 1 eq), **2** (0.33 mmol, 1.1 eq) and toluene (6 mL), the resulting mixture was stirred at 60 °C for 6-18 h. The reaction solution was concentrated and purified by flash chromatography on silica gel (petroleum ether/ethyl acetate = 80:1-20:1) to give **3**.

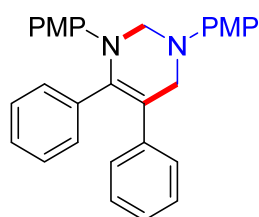

#### ***1,3-bis(4-methoxyphenyl)-5,6-diphenyl-1,2,3,4-tetrahydropyrimidine (3a):***

This compound was prepared via general procedure as yellow oil (116 mg, yield: 86%).

$^1\text{H}$  NMR (400 MHz,  $\text{CDCl}_3$ )  $\delta$  7.20-7.12 (m, 7H), 7.00-6.96 (m, 3H), 6.94-6.90 (m, 2H), 6.77 (s, 4H), 6.66-6.62 (m, 2H), 4.81 (s, 2H), 4.13 (s, 2H), 3.73 (s, 3H), 3.66 (s, 3H).  $^{13}\text{C}$  NMR (100 MHz,  $\text{CDCl}_3$ )  $\delta$  155.52, 153.58, 142.50, 141.14, 140.78, 140.17, 136.84, 130.91, 129.81, 127.99, 127.49, 127.07, 126.08, 125.91, 120.11, 117.68,

114.56, 113.83, 72.65, 55.67, 55.27, 53.07. HRMS (ESI) calcd. for  $C_{30}H_{29}N_2O_2$   $[M+H]^+$ : 449.2224, found: 449.2221.

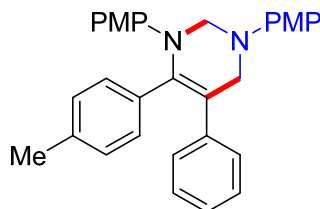

***1,3-bis(4-methoxyphenyl)-5-phenyl-6-(p-tolyl)-1,2,3,4-tetrahydropyrimidine (3b):***

This compound was prepared via general procedure as yellow oil (121 mg, yield: 87%).

$^1H$  NMR (400 MHz,  $CDCl_3$ )  $\delta$  7.20-7.10 (m, 5H), 7.04 (d,  $J = 8.0$  Hz, 2H), 6.96-6.89 (m, 2H), 6.80-6.72 (m, 6H), 6.67-6.60 (m, 2H), 4.79 (s, 2H), 4.12 (s, 2H), 3.71 (s, 3H), 3.65 (s, 3H), 2.14 (s, 3H).  $^{13}C$  NMR (100 MHz,  $CDCl_3$ )  $\delta$  155.48, 153.54, 142.56, 141.33, 140.77, 140.42, 136.71, 133.86, 130.75, 129.79, 128.31, 128.00, 125.97, 125.91, 119.64, 117.61, 114.57, 113.83, 72.63, 55.67, 55.27, 53.09, 21.21. HRMS (ESI) calcd. for  $C_{31}H_{30}N_2NaO_2$   $[M+Na]^+$ : 485.2199, found: 485.2194.

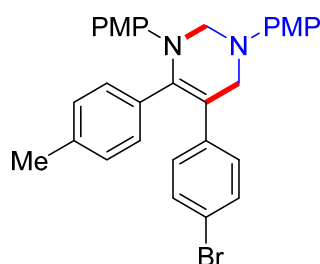

***5-(4-bromophenyl)-1,3-bis(4-methoxyphenyl)-6-(p-tolyl)-1,2,3,4-tetrahydropyrimidine (3c):***

This compound was prepared via general procedure as yellow oil (130 mg, yield: 80%).

$^1H$  NMR (400 MHz,  $CDCl_3$ )  $\delta$  7.28 (d,  $J = 8.0$  Hz, 2H), 7.01 (t,  $J = 8.0$  Hz, 4H), 6.89 (d,  $J = 8.0$  Hz, 2H), 6.81 (d,  $J = 8.0$  Hz, 2H), 6.75 (s, 4H), 6.63 (d,  $J = 8.0$  Hz, 2H), 4.77 (s, 2H), 4.08 (s, 2H), 3.72 (s, 3H), 3.66 (s, 3H), 2.16 (s, 3H).  $^{13}C$  NMR (100 MHz,  $CDCl_3$ )  $\delta$  155.57, 153.63, 142.40, 141.53, 141.03, 139.37, 137.07, 133.43, 131.30,

131.05, 130.76, 128.50, 126.02, 119.64, 117.84, 117.71, 114.55, 113.82, 72.53, 55.66, 55.26, 52.80, 21.23. HRMS (ESI) calcd. for  $C_{31}H_{30}BrN_2O_2$   $[M+H]^+$ : 541.1485, found: 541.1484.

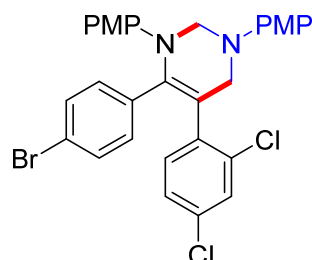

***6-(4-bromophenyl)-5-(2,4-dichlorophenyl)-1,3-bis(4-methoxyphenyl)-1,2,3,4-tetrahydropyrimidine (3d):***

This compound was prepared via general procedure as a white solid (114 mg, yield: 64%), mp: 99-101 °C.

$^1H$  NMR (400 MHz,  $CDCl_3$ )  $\delta$  7.36 (d,  $J = 4.0$  Hz, 1H), 7.15-7.09 (m, 4H), 7.02 (d,  $J = 8.0$  Hz, 2H), 6.93 (d,  $J = 8.0$  Hz, 2H), 6.75 (s, 4H), 6.66 (d,  $J = 8.0$  Hz, 2H), 4.87 (d,  $J = 12.0$  Hz, 1H), 4.77 (d,  $J = 12.0$  Hz, 1H), 4.19 (d,  $J = 16.0$  Hz, 1H), 3.82 (d,  $J = 16.0$  Hz, 1H), 3.72 (s, 3H), 3.69 (s, 3H).  $^{13}C$  NMR (100 MHz,  $CDCl_3$ )  $\delta$  155.86, 153.78, 142.20, 141.32, 140.71, 137.33, 135.71, 135.41, 133.50, 133.44, 131.28, 130.85, 129.53, 127.30, 125.91, 121.56, 118.18, 118.03, 114.51, 114.02, 72.81, 55.64, 55.30, 52.63. HRMS (ESI) calcd. for  $C_{30}H_{26}BrCl_2N_2O_2$   $[M+H]^+$ : 595.0549, found: 595.0545.

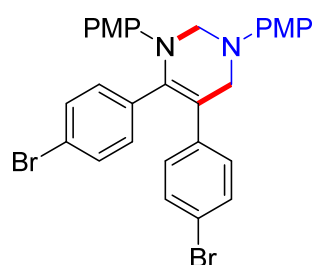

***5,6-bis(4-bromophenyl)-1,3-bis(4-methoxyphenyl)-1,2,3,4-tetrahydropyrimidine (3e):***

This compound was prepared via general procedure as a white solid (141mg, yield:

78%), mp: 169-171 °C.

<sup>1</sup>H NMR (400 MHz, CDCl<sub>3</sub>) δ 7.31 (d, *J* = 8.0 Hz, 2H), 7.14 (d, *J* = 8.0 Hz, 2H), 7.00 (t, *J* = 8.0 Hz, 4H), 6.87 (d, *J* = 8.0 Hz, 2H), 6.80-6.71 (m, 4H), 6.65 (d, *J* = 8.0 Hz, 2H), 4.76 (s, 2H), 4.08 (s, 2H), 3.73 (s, 3H), 3.69 (s, 3H). <sup>13</sup>C NMR (100 MHz, CDCl<sub>3</sub>) δ 155.89, 153.79, 142.22, 140.58, 140.45, 138.70, 135.52, 132.41, 131.31, 131.00, 127.53, 126.11, 121.39, 120.17, 119.19, 117.82, 114.58, 113.98, 72.63, 55.65, 55.30, 52.86. HRMS (ESI) calcd. for C<sub>30</sub>H<sub>27</sub>Br<sub>2</sub>N<sub>2</sub>O<sub>2</sub> [M+H]<sup>+</sup>: 605.0434, found: 605.0435.

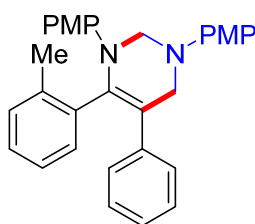

***1,3-bis(4-methoxyphenyl)-5-phenyl-6-(o-tolyl)-1,2,3,4-tetrahydropyrimidine (3f):***

This compound was prepared via general procedure as yellow oil (85 mg, yield: 61%).

<sup>1</sup>H NMR (400 MHz, CDCl<sub>3</sub>) δ 7.14-7.07 (m, 3H), 7.07-7.01 (m, 3H), 6.96-6.91 (m, 1H), 6.88-6.82 (m, 6H), 6.81-6.76 (m, 2H), 6.63-6.57 (m, 2H), 4.89-4.75 (m, 2H), 4.29-4.14 (m, 2H), 3.74 (s, 3H), 3.65 (s, 3H), 2.17 (s, 3H). <sup>13</sup>C NMR (100 MHz, CDCl<sub>3</sub>) δ 155.70, 153.69, 142.75, 140.58, 140.42, 140.00, 137.40, 135.95, 132.45, 130.00, 128.97, 127.72, 127.39, 125.91, 125.74, 124.95, 118.21, 118.09, 114.54, 113.64, 71.57, 55.66, 55.24, 52.68, 20.15. HRMS (ESI) calcd. for C<sub>31</sub>H<sub>30</sub>N<sub>2</sub>NaO<sub>2</sub> [M+Na]<sup>+</sup>: 485.2199, found: 485.2194.

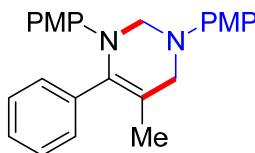

***1,3-bis(4-methoxyphenyl)-5-methyl-6-phenyl-1,2,3,4-tetrahydropyrimidine (3g):***

This compound was prepared via general procedure as yellow oil (83 mg, yield: 72%).

<sup>1</sup>H NMR (400 MHz, CDCl<sub>3</sub>) δ 7.45-7.39 (m, 2H), 7.25 (t, *J* = 8.0 Hz, 2H), 7.17 (t, *J* =

8.0 Hz, 1H), 6.96-6.91 (m, 2H), 6.82-6.77 (m, 2H), 6.76-6.71 (m, 2H), 6.69-6.63 (m, 2H), 4.74 (s, 2H), 3.77 (s, 2H), 3.76 (s, 3H), 3.69 (s, 3H), 1.92 (s, 3H).  $^{13}\text{C}$  NMR (100 MHz,  $\text{CDCl}_3$ )  $\delta$  155.20, 153.27, 142.70, 141.82, 137.96, 137.42, 130.02, 127.70, 127.15, 125.28, 117.17, 115.32, 114.53, 113.79, 72.41, 55.68, 55.28, 53.66, 17.54. HRMS (ESI) calcd. for  $\text{C}_{25}\text{H}_{27}\text{N}_2\text{O}_2$   $[\text{M}+\text{H}]^+$ : 387.2067, found: 387.2069.

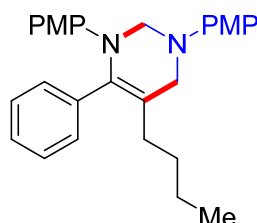

***5-butyl-1,3-bis(4-methoxyphenyl)-6-phenyl-1,2,3,4-tetrahydropyrimidine (3h):***

This compound was prepared via general procedure as yellow oil (75 mg, yield: 58%).

$^1\text{H}$  NMR (300 MHz,  $\text{CDCl}_3$ )  $\delta$  7.38-7.32 (m, 2H), 7.24-7.10 (m, 3H), 6.93-6.86 (m, 2H), 6.79-6.69 (m, 4H), 6.65-6.59 (m, 2H), 4.69 (s, 2H), 3.80 (s, 2H), 3.73 (s, 3H), 3.65 (s, 3H), 2.26-2.14 (m, 2H), 1.61-1.53 (m, 2H), 1.37-1.27 (m, 2H), 0.88 (t,  $J = 8.0$  Hz, 3H).  $^{13}\text{C}$  NMR (75 MHz,  $\text{CDCl}_3$ )  $\delta$  155.23, 153.27, 142.86, 141.69, 138.44, 137.57, 129.88, 127.66, 127.18, 125.38, 119.92, 117.23, 114.53, 113.75, 72.24, 55.68, 55.26, 51.65, 32.20, 30.96, 22.72, 14.00. HRMS (ESI) calcd. for  $\text{C}_{28}\text{H}_{33}\text{N}_2\text{O}_2$   $[\text{M}+\text{H}]^+$ : 429.2537, found: 429.2536.

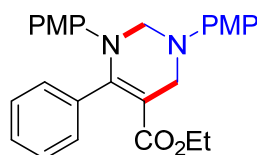

***ethyl 1,3-bis(4-methoxyphenyl)-6-phenyl-1,2,3,4-tetrahydropyrimidine-5-carboxylate (3i):<sup>[4]</sup>***

This compound was prepared via general procedure as a white solid (99 mg, yield: 74%).

$^1\text{H}$  NMR (400 MHz,  $\text{CDCl}_3$ )  $\delta$  7.13 (s, 5H), 6.92 (d,  $J = 12.0$  Hz, 2H), 6.78 (d,  $J = 12.0$  Hz, 2H), 6.62 (d,  $J = 8.0$  Hz, 2H), 6.52 (d,  $J = 8.0$  Hz, 2H), 4.84 (s, 2H), 4.27 (s, 2H),

3.90 (q,  $J = 8.0$  Hz, 2H), 3.75 (s, 3H), 3.64 (s, 3H), 0.87 (t,  $J = 8.0$  Hz, 3H).  $^{13}\text{C}$  NMR (100 MHz,  $\text{CDCl}_3$ )  $\delta$  167.84, 156.70, 154.86, 154.18, 142.39, 138.90, 136.60, 129.76, 128.13, 128.05, 127.45, 119.30, 114.48, 113.68, 102.29, 71.97, 59.39, 55.62, 55.22, 49.66, 13.81.

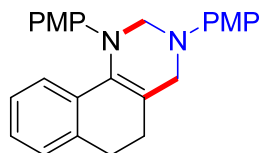

**1,3-bis(4-methoxyphenyl)-1,2,3,4,5,6-hexahydrobenzo[h]quinazoline (3j):**

This compound was prepared via general procedure as a white solid (106 mg, yield: 89%), mp: 144-146 °C.

$^1\text{H}$  NMR (400 MHz,  $\text{CDCl}_3$ )  $\delta$  7.13 (d,  $J = 4.0$  Hz, 1H), 7.10-7.03 (m, 2H), 7.02-6.93 (m, 3H), 6.82-6.74 (m, 4H), 6.71 (d,  $J = 8.0$  Hz, 2H), 4.74 (s, 2H), 3.85 (s, 2H), 3.72 (s, 3H), 3.73 (s, 3H), 2.93 (t,  $J = 8.0$  Hz, 2H), 2.40 (t,  $J = 8.0$  Hz, 2H).  $^{13}\text{C}$  NMR (100 MHz,  $\text{CDCl}_3$ )  $\delta$  155.15, 153.29, 148.26, 142.61, 142.02, 136.02, 134.85, 131.78, 127.32, 126.57, 126.27, 123.59, 121.74, 116.96, 114.58, 114.28, 72.24, 55.69, 55.43, 52.12, 28.22, 26.20. HRMS (ESI) calcd. for  $\text{C}_{26}\text{H}_{27}\text{N}_2\text{O}_2$   $[\text{M}+\text{H}]^+$ : 399.2067, found: 399.2065.

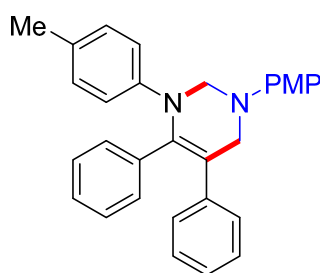

**3-(4-methoxyphenyl)-5,6-diphenyl-1-(p-tolyl)-1,2,3,4-tetrahydropyrimidine (3k):**

This compound was prepared via general procedure as yellow oil (97 mg, yield: 75%).

$^1\text{H}$  NMR (400 MHz,  $\text{CDCl}_3$ )  $\delta$  7.23-7.11 (m, 7H), 7.04-6.96 (m, 3H), 6.93-6.83 (m, 4H), 6.78 (s, 4H), 4.87 (s, 2H), 4.14 (s, 2H), 3.74 (s, 3H), 2.17 (s, 3H).  $^{13}\text{C}$  NMR (125 MHz,  $\text{CDCl}_3$ )  $\delta$  153.55, 145.17, 142.48, 140.43, 140.15, 136.82, 132.13, 130.83,



129.81, 129.17, 127.97, 127.48, 127.04, 126.09, 124.24, 120.57, 117.64, 114.53, 72.15, 55.65, 53.21, 20.73. HRMS (ESI) calcd. for C<sub>30</sub>H<sub>29</sub>N<sub>2</sub>O [M+H]<sup>+</sup>: 433.2274, found: 433.2278.

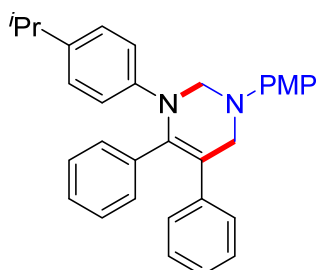

***1-(4-isopropylphenyl)-3-(4-methoxyphenyl)-5,6-diphenyl-1,2,3,4-tetrahydropyrimidine (3l):***

This compound was prepared via general procedure as yellow oil (94 mg, yield: 68%).

<sup>1</sup>H NMR (400 MHz, CDCl<sub>3</sub>) δ 7.22-7.11 (m, 7H), 7.03-6.98 (m, 3H), 6.94 (d, *J* = 8.0 Hz, 2H), 6.88 (d, *J* = 8.0 Hz, 2H), 6.77 (s, 4H), 4.88 (s, 2H), 4.14 (s, 2H), 3.73 (s, 3H), 2.78-2.68 (m, 1H), 1.14 (s, 3H), 1.12 (s, 3H). <sup>13</sup>C NMR (101 MHz, CDCl<sub>3</sub>) δ 153.51, 145.33, 142.93, 142.50, 140.40, 140.19, 136.86, 130.81, 129.81, 128.00, 127.50, 127.03, 126.50, 126.13, 123.92, 120.85, 117.57, 114.51, 71.98, 55.65, 53.30, 33.28, 23.95. HRMS (ESI) calcd. for C<sub>32</sub>H<sub>33</sub>N<sub>2</sub>O [M+H]<sup>+</sup>: 461.2587, found: 461.2588.

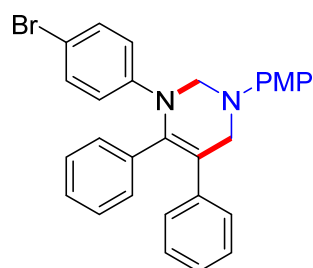

***1-(4-bromophenyl)-3-(4-methoxyphenyl)-5,6-diphenyl-1,2,3,4-tetrahydropyrimidine (3m):***

This compound was prepared via general procedure as yellow oil (77 mg, yield: 52%).

<sup>1</sup>H NMR (400 MHz, CDCl<sub>3</sub>) δ 7.21-7.11 (m, 9H), 7.04-7.97 (m, 3H), 6.80 (d, *J* = 8.0

Hz, 2H), 6.78 (s, 4H), 4.88 (s, 2H), 4.14 (s, 2H), 3.73 (s, 3H).  $^{13}\text{C}$  NMR (100 MHz,  $\text{CDCl}_3$ )  $\delta$  153.85, 146.82, 142.17, 139.71, 139.68, 136.29, 131.52, 130.71, 129.78, 128.08, 127.69, 127.33, 126.39, 125.73, 121.68, 117.97, 115.55, 114.59, 72.03, 55.67, 53.30. HRMS (ESI) calcd. for  $\text{C}_{29}\text{H}_{26}\text{BrN}_2\text{O}$   $[\text{M}+\text{H}]^+$ : 497.1223, found: 497.1221.

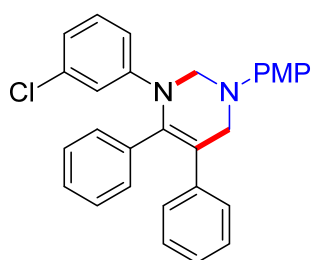

***1-(3-chlorophenyl)-3-(4-methoxyphenyl)-5,6-diphenyl-1,2,3,4-tetrahydropyrimidine (3n):***

This compound was prepared via general procedure as yellow oil (64 mg, yield: 47%).

$^1\text{H}$  NMR (400 MHz,  $\text{CDCl}_3$ )  $\delta$  7.21-7.12 (m, 7H), 7.03-6.98 (m, 3H), 6.96 (d,  $J = 8.0$  Hz, 1H), 6.92 (t,  $J = 4.0$  Hz, 1H), 6.83-6.74 (m, 6H), 4.90 (s, 2H), 4.15 (s, 2H), 3.73 (s, 3H).  $^{13}\text{C}$  NMR (100 MHz,  $\text{CDCl}_3$ )  $\delta$  153.89, 148.96, 142.18, 139.67, 139.54, 136.23, 133.98, 130.66, 129.78, 129.37, 128.09, 127.70, 127.35, 126.43, 124.14, 122.69, 122.26, 121.90, 118.08, 114.57, 71.90, 55.65, 53.36. HRMS (ESI) calcd. for  $\text{C}_{29}\text{H}_{26}\text{ClN}_2\text{O}$   $[\text{M}+\text{H}]^+$ : 453.1728, found: 453.1725.

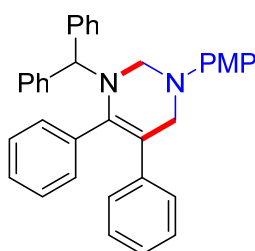

***1-benzhydryl-3-(4-methoxyphenyl)-5,6-diphenyl-1,2,3,4-tetrahydropyrimidine (3o):***

This compound was prepared via general procedure as a white solid (110 mg, yield: 72%), mp: 186-188 °C.

$^1\text{H}$  NMR (300 MHz,  $\text{CDCl}_3$ )  $\delta$  7.25-7.16 (m, 12H), 7.12-6.99 (m, 8H), 6.76-6.69 (m,

2H), 6.56-6.49 (m, 2H), 5.56 (s, 1H), 4.47 (s, 2H), 3.83 (s, 2H), 3.73 (s, 3H).  $^{13}\text{C}$  NMR (100 MHz,  $\text{CDCl}_3$ )  $\delta$  153.13, 142.76, 142.63, 140.88, 140.67, 137.07, 130.80, 129.65, 129.02, 128.00, 127.91, 127.72, 127.48, 126.92, 125.49, 116.94, 116.64, 114.32, 66.23, 63.93, 61.29, 55.63, 52.48. HRMS (ESI) calcd. for  $\text{C}_{36}\text{H}_{33}\text{N}_2\text{O}$   $[\text{M}+\text{H}]^+$ : 509.2587, found: 509.2589.

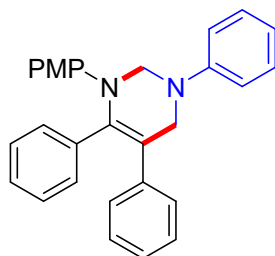

***1-(4-methoxyphenyl)-3,5,6-triphenyl-1,2,3,4-tetrahydropyrimidine (3p):***

This compound was prepared via general procedure as yellow oil (109 mg, yield: 87%).

$^1\text{H}$  NMR (400 MHz,  $\text{CDCl}_3$ )  $\delta$  7.24-7.11 (m, 9H), 7.04-6.92 (m, 5H), 6.83-6.75 (m, 3H), 6.71-6.62 (m, 2H), 4.93 (s, 2H), 4.22 (s, 2H), 3.67 (s, 3H).  $^{13}\text{C}$  NMR (100 MHz,  $\text{CDCl}_3$ )  $\delta$  155.65, 148.18, 141.02, 140.92, 140.07, 136.78, 130.93, 129.76, 129.21, 128.04, 127.54, 127.18, 126.18, 125.88, 120.26, 119.19, 115.26, 113.93, 70.82, 55.28, 52.00. HRMS (ESI) calcd. for  $\text{C}_{29}\text{H}_{27}\text{N}_2\text{O}$   $[\text{M}+\text{H}]^+$ : 419.2118, found: 419.2115.

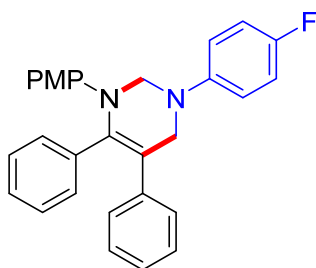

***3-(4-fluorophenyl)-1-(4-methoxyphenyl)-5,6-diphenyl-1,2,3,4-tetrahydropyrimidine (3q):***

This compound was prepared via general procedure as yellow oil (92 mg, yield: 70%).

$^1\text{H}$  NMR (400 MHz,  $\text{CDCl}_3$ )  $\delta$  7.22-7.12 (m, 7H), 7.03-6.96 (m, 3H), 6.94-6.85 (m,

4H), 6.77-6.69 (m, 2H), 6.67-6.61 (m, 2H), 4.85 (s, 2H), 4.16 (s, 2H), 3.67 (s, 3H).  $^{13}\text{C}$  NMR (100 MHz,  $\text{CDCl}_3$ )  $\delta$  155.63, 144.80, 144.78, 140.93, 139.98, 136.68, 130.90, 129.76, 128.04, 127.54, 127.18, 126.19, 125.85, 119.95, 117.16, 117.09, 115.70, 115.48, 113.91, 72.00, 55.27, 52.74. HRMS (ESI) calcd. for  $\text{C}_{29}\text{H}_{26}\text{FN}_2\text{O}$   $[\text{M}+\text{H}]^+$ : 437.2024, found: 437.2025.

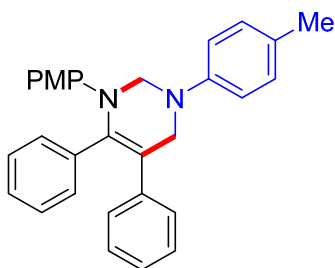

***1-(4-methoxyphenyl)-5,6-diphenyl-3-(p-tolyl)-1,2,3,4-tetrahydropyrimidine (3r):***

This compound was prepared via general procedure as yellow oil (114 mg, yield: 88%).

$^1\text{H}$  NMR (400 MHz,  $\text{CDCl}_3$ )  $\delta$  7.20-7.09 (m, 7H), 7.01-6.96 (m, 5H), 6.93 (d,  $J = 8.0$  Hz, 2H), 6.69 (d,  $J = 8.0$  Hz, 2H), 6.63 (d,  $J = 8.0$  Hz, 2H), 4.85 (s, 2H), 4.16 (s, 2H), 3.64 (s, 3H), 2.22 (s, 3H).  $^{13}\text{C}$  NMR (100 MHz,  $\text{CDCl}_3$ )  $\delta$  155.63, 146.06, 141.08, 140.93, 140.18, 136.87, 130.96, 129.81, 129.72, 128.72, 128.04, 127.54, 127.15, 126.15, 125.95, 120.28, 115.68, 113.91, 71.45, 55.29, 52.43, 20.48. HRMS (ESI) calcd. for  $\text{C}_{30}\text{H}_{29}\text{N}_2\text{O}$   $[\text{M}+\text{H}]^+$ : 433.2274, found: 433.2275.

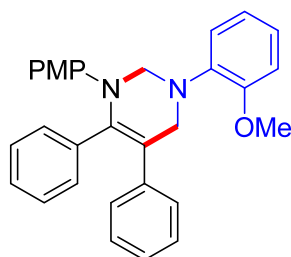

***3-(2-methoxyphenyl)-1-(4-methoxyphenyl)-5,6-diphenyl-1,2,3,4-tetrahydropyrimidine (3s):***

This compound was prepared via general procedure as colorless oil (104 mg, yield: 77%).

$^1\text{H}$  NMR (400 MHz,  $\text{CDCl}_3$ )  $\delta$  7.20-7.10 (m, 7H), 7.06 (dd,  $J = 8.0, 4.0$  Hz, 1H), 7.01-6.95 (m, 3H), 6.93-6.85 (m, 2H), 6.84-6.79 (m, 2H), 6.70 (dd,  $J = 8.0, 4.0$  Hz, 1H), 6.62-6.55 (m, 2H), 4.87 (s, 2H), 4.20 (s, 2H), 3.64 (s, 3H), 3.44 (s, 3H).  $^{13}\text{C}$  NMR (100 MHz,  $\text{CDCl}_3$ )  $\delta$  154.86, 152.20, 141.32, 140.40, 138.56, 137.71, 136.91, 130.97, 129.99, 127.94, 127.45, 126.92, 125.92, 125.74, 122.77, 120.74, 119.41, 118.34, 113.37, 111.38, 71.09, 55.32, 55.17, 53.49. HRMS (ESI) calcd. for  $\text{C}_{30}\text{H}_{29}\text{N}_2\text{O}_2$   $[\text{M}+\text{H}]^+$ : 449.2224, found: 449.2221.

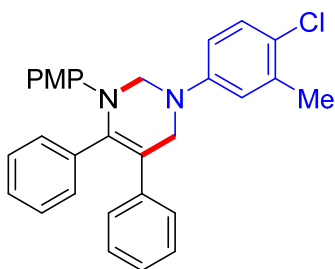

***3-(4-chloro-3-methylphenyl)-1-(4-methoxyphenyl)-5,6-diphenyl-1,2,3,4-tetrahydropyrimidine (3t):***

This compound was prepared via general procedure as yellow oil (109 mg, yield: 78%).

$^1\text{H}$  NMR (400 MHz,  $\text{CDCl}_3$ )  $\delta$  7.22-7.11 (m, 7H), 7.03-6.96 (m, 4H), 6.93 (d,  $J = 8.0$  Hz, 2H), 6.75 (d,  $J = 4.0$  Hz, 1H), 6.65 (d,  $J = 8.0$  Hz, 2H), 6.54 (dd,  $J = 8.0, 4.0$  Hz, 1H), 4.86 (s, 2H), 4.16 (s, 2H), 3.67 (s, 3H), 2.23 (s, 3H).  $^{13}\text{C}$  NMR (75 MHz,  $\text{CDCl}_3$ )  $\delta$  155.73, 147.38, 140.95, 140.76, 139.85, 136.61, 134.80, 131.15, 130.88, 129.69, 128.03, 127.52, 127.20, 126.22, 126.12, 125.81, 120.01, 115.61, 113.97, 113.87, 70.46, 55.28, 52.14, 18.96. HRMS (ESI) calcd. for  $\text{C}_{30}\text{H}_{28}\text{ClN}_2\text{O}$   $[\text{M}+\text{H}]^+$ : 467.1885, found: 467.1884,.

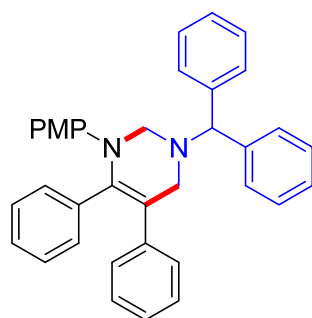

### ***3-benzhydryl-1-(4-methoxyphenyl)-5,6-diphenyl-1,2,3,4-tetrahydropyrimidine (3u):***

This compound was prepared via general procedure as a white solid (120 mg, yield: 79%), mp: 200-202 °C.

$^1\text{H}$  NMR (400 MHz,  $\text{CDCl}_3$ )  $\delta$  7.24-7.19 (m, 4H), 7.18-7.10 (m, 8H), 7.09-7.02 (m, 3H), 7.00-6.91 (m, 5H), 6.83 (d,  $J = 8.0$  Hz, 2H), 6.64 (d,  $J = 8.0$  Hz, 2H), 4.56 (s, 1H), 4.21 (s, 2H), 3.72 (s, 3H), 3.50 (s, 2H).  $^{13}\text{C}$  NMR (100 MHz,  $\text{CDCl}_3$ )  $\delta$  155.23, 142.46, 141.63, 140.44, 139.88, 137.04, 130.82, 129.80, 128.43, 127.77, 127.64, 127.44, 126.95, 126.85, 125.76, 125.65, 120.73, 113.61, 71.43, 70.98, 55.95, 55.44. HRMS (ESI) calcd. for  $\text{C}_{36}\text{H}_{33}\text{N}_2\text{O}$   $[\text{M}+\text{H}]^+$ : 509.2587, found: 509.2589.

## **Large scale reaction for Scheme 2**

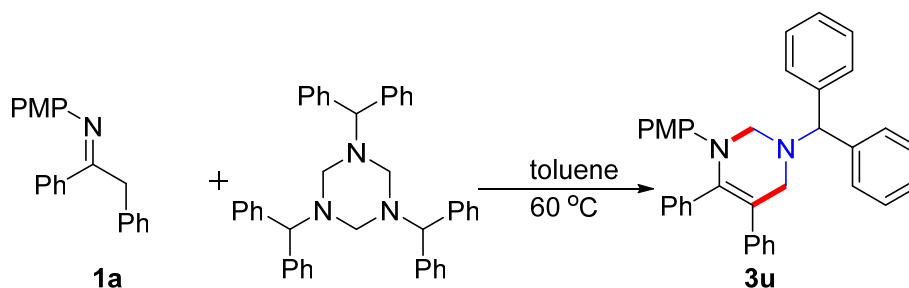

To a flask was added **1a** (5 g, 16.6 mmol), 1,3,5-tribenzhydryl-1,3,5-triazinane (10.7 g, 18.2 mmol) and toluene (300 mL), the resulting solution was stirred at 60 °C for 24 h. The reaction mixture was concentrated, the residue was purified by recrystallization from EtOAc/Hexane to give **3u** as a white solid (6.1 g, yield: 72%).

## **Mechanistic studies for Scheme 3**

### **1. Scheme 3a**

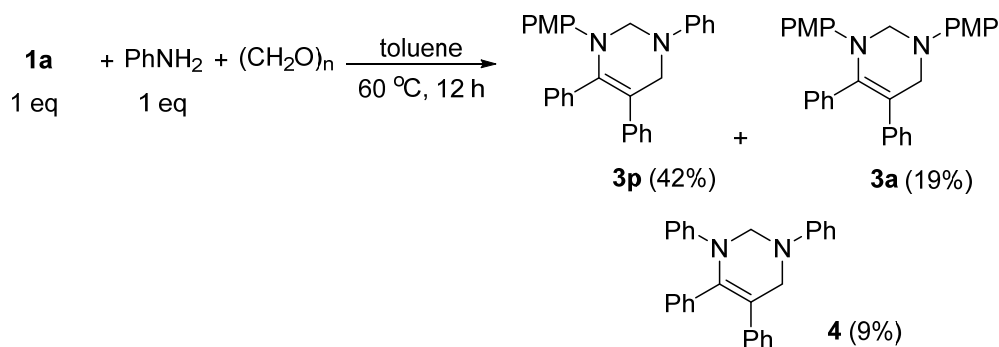

To a tube was added **1a** (0.30 mmol, 1 eq), PhNH<sub>2</sub> (0.30 mmol, 1 eq), (CH<sub>2</sub>O)<sub>n</sub> (0.63 mmol, 2.1 eq) and toluene (6 mL), the resulting mixture was stirred at 60 °C for 12 h. The reaction mixture was concentrated, the residue was purified by flash chromatography on silica gel (petroleum ether/ethyl acetate = 80:1-20:1) to give **3p** (53 mg, yield: 42%), **3a** (26 mg, yield: 19%) as yellow oil and **4** (10 mg, yield: 9%) as yellow oil. Data of **4**: <sup>1</sup>H NMR (400 MHz, CDCl<sub>3</sub>) δ 7.21-7.11 (m, 9H), 7.10-7.04 (m, 2H), 7.02-6.92 (m, 5H), 6.87-6.81(m, 1H), 6.80-6.71(m, 3H), 5.01 (s, 2H), 4.21 (s, 2H). <sup>13</sup>C NMR (75 MHz, CDCl<sub>3</sub>) δ 148.05, 147.42, 140.39, 139.94, 136.59, 130.80, 129.73, 129.17, 128.60, 128.05, 127.56, 127.19, 126.28, 124.17, 122.81, 121.10, 119.21, 115.25, 70.10, 52.18. HRMS (ESI) calcd. for C<sub>28</sub>H<sub>25</sub>N<sub>2</sub> [M+H]<sup>+</sup>: 389.2012, found: 389.2016.

## 2. Scheme 3b

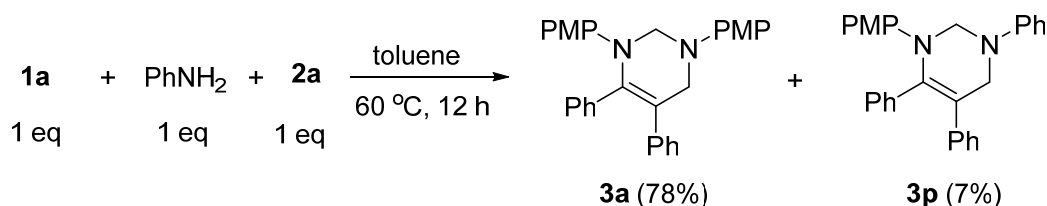

To a tube was added **1a** (0.30 mmol, 1 eq), PhNH<sub>2</sub> (0.30 mmol, 1 eq), **2a** (0.30 mmol, 1 eq) and toluene (6 mL), the resulting mixture was stirred at 60 °C for 12 h. The reaction mixture was concentrated, the residue was purified by flash chromatography on silica gel (petroleum ether/ethyl acetate = 80:1-20:1) to give **3a** (105 mg, yield: 78%) as yellow oil and **3p** (9 mg, yield: 7%) as yellow oil.

## 2. Scheme 3c

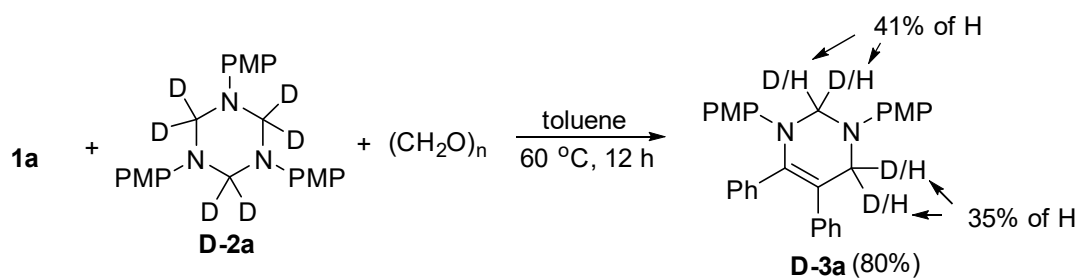

To a tube was added **1a** (0.30 mmol, 1 eq), **D-2a** (0.33 mmol, 1.1 eq),  $(\text{CH}_2\text{O})_n$  (0.63 mmol, 2.1 eq) and toluene (6 mL), the resulting mixture was stirred at 60 °C for 12 h. The reaction mixture was concentrated, the residue was purified by flash chromatography on silica gel (petroleum ether/ethyl acetate = 80:1-20:1) to give **D-3a** (109 mg, yield: 80%) as yellow oil.

$^1\text{H}$  NMR (300 MHz,  $\text{CDCl}_3$ )  $\delta$  7.20-7.10 (m, 7H), 7.01-6.95 (m, 3H), 6.94-6.87 (m, 2H), 6.76 (s, 4H), 6.63 (d,  $J = 8.7$  Hz, 2H), 4.81 (s, 0.82H), 4.13 (s, 0.7H), 3.72 (s, 3H), 3.65 (s, 3H).  $^{13}\text{C}$  NMR (75 MHz,  $\text{CDCl}_3$ )  $\delta$  155.52, 153.55, 142.54, 142.51, 141.14, 141.10, 140.87, 140.83, 140.79, 140.76, 140.18, 136.84, 130.92, 129.80, 127.99, 127.49, 127.08, 126.07, 126.06, 125.92, 125.88, 120.10, 119.90, 117.69, 117.64, 114.57, 113.83, 72.64, 72.58, 55.66, 55.26, 53.08, 53.01. HRMS (ESI) calcd. for  $\text{C}_{30}\text{H}_{25}\text{D}_4\text{N}_2\text{O}_2$   $[\text{M}+\text{H}]^+$ : 453.2475, found: 453.2478.

### X-ray structure of **3j**:

The crystal structures have been deposited at the Cambridge Crystallographic Data Centre (CCDC 1577296, **3j**). The data can be obtained free of charge via the internet at [www.ccdc.cam.ac.uk/data\\_request/cif](http://www.ccdc.cam.ac.uk/data_request/cif).

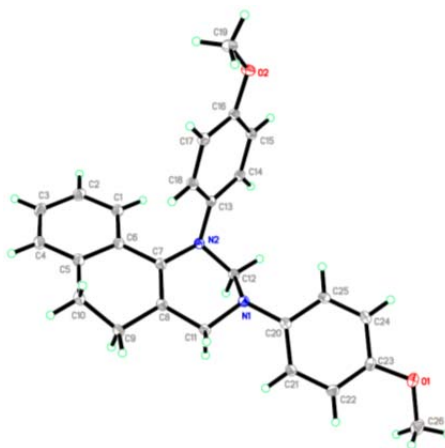



## References:

- [1] Zhu, C.; Xu, G.; Sun, J. *Angew. Chem. Int. Ed.* **2016**, *55*, 11867.
- [2] (a) Gautier, F-M.; Jones, S.; Martin, S. J. *Org. Biomol. Chem.* **2009**, *7*, 229. (b) Saito, K.; Horiguchi, K.; Shibata, Y.; Yamanaka, M.; Akiyama, T. *Chem. Eur. J.* **2014**, *20*, 7616. (c) Lu, B.; Wu, J.; Yoshikai, N. *J. Am. Chem. Soc.* **2014**, *136*, 11598.
- [3] Zheng, Y.; Xue, Z.; Liu, L.; Shu, C.; Yuan, W.; Zhang, X. *Org. Biomol. Chem.* **2013**, *11*, 412.
- [4] Cao, H.; Wang, X.; Jiang, H.; Zhu, Q.; Zhang, M.; Liu, H. *Chem. Eur. J.* **2008**, *14*, 11623.

7.25  
7.18  
7.18  
7.17  
7.16  
7.15  
7.14  
7.12  
6.99  
6.98  
6.98  
6.93  
6.93  
6.92  
6.91  
6.77  
6.66  
6.65  
6.64  
6.63

4.81

4.13

3.73

3.66

1.56

0.00

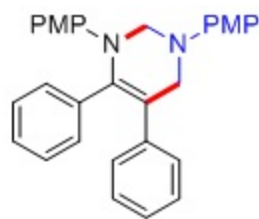

3a

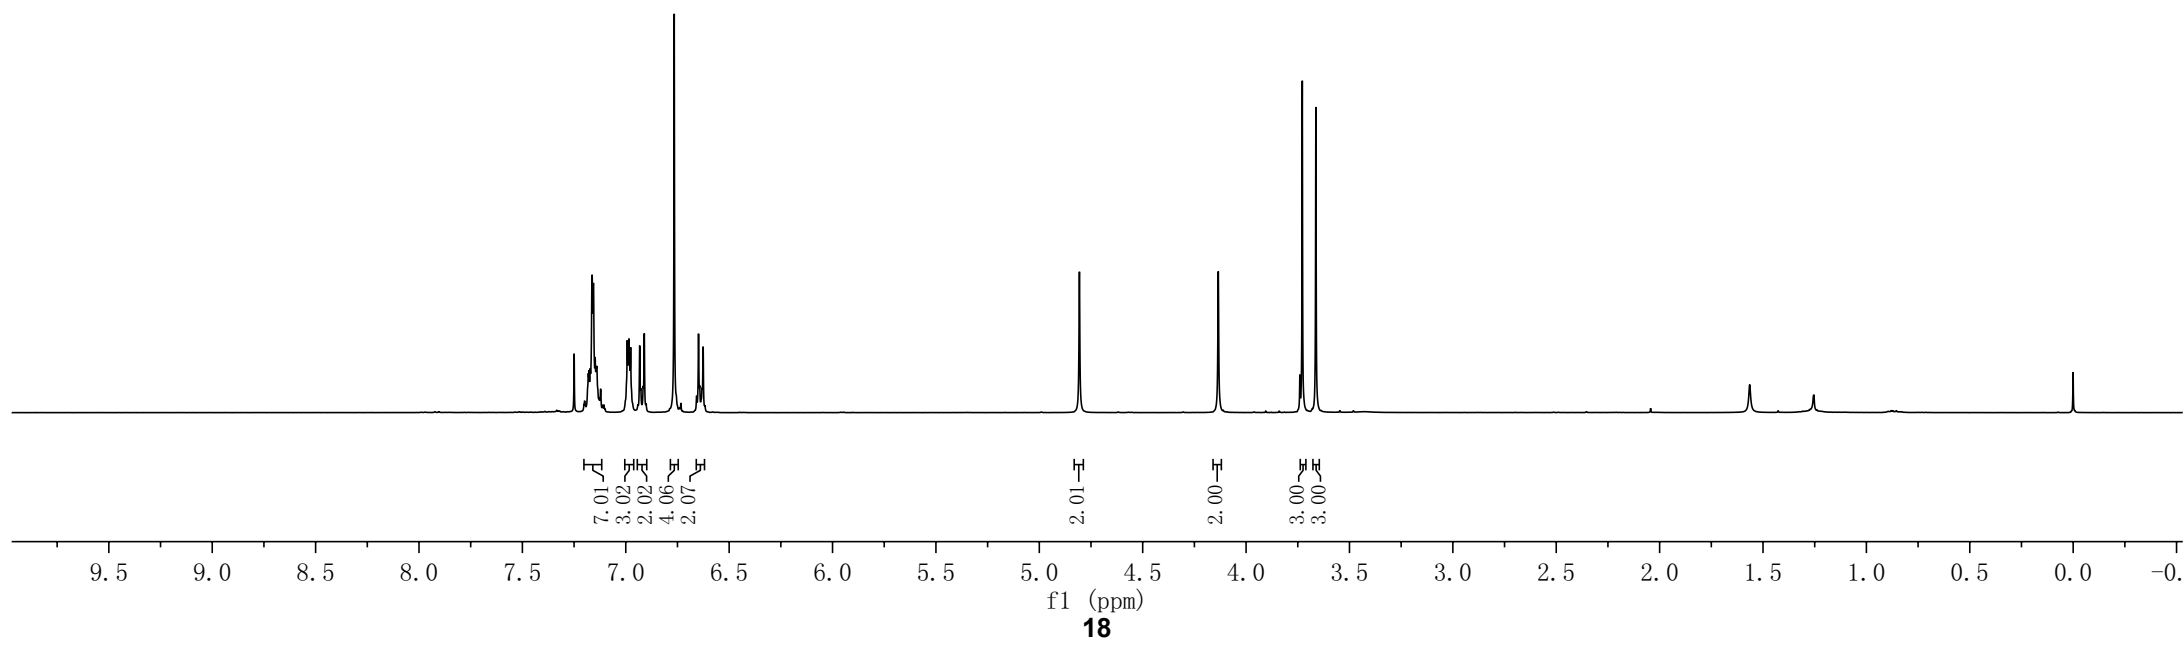

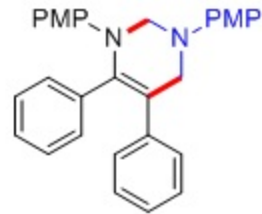

3a

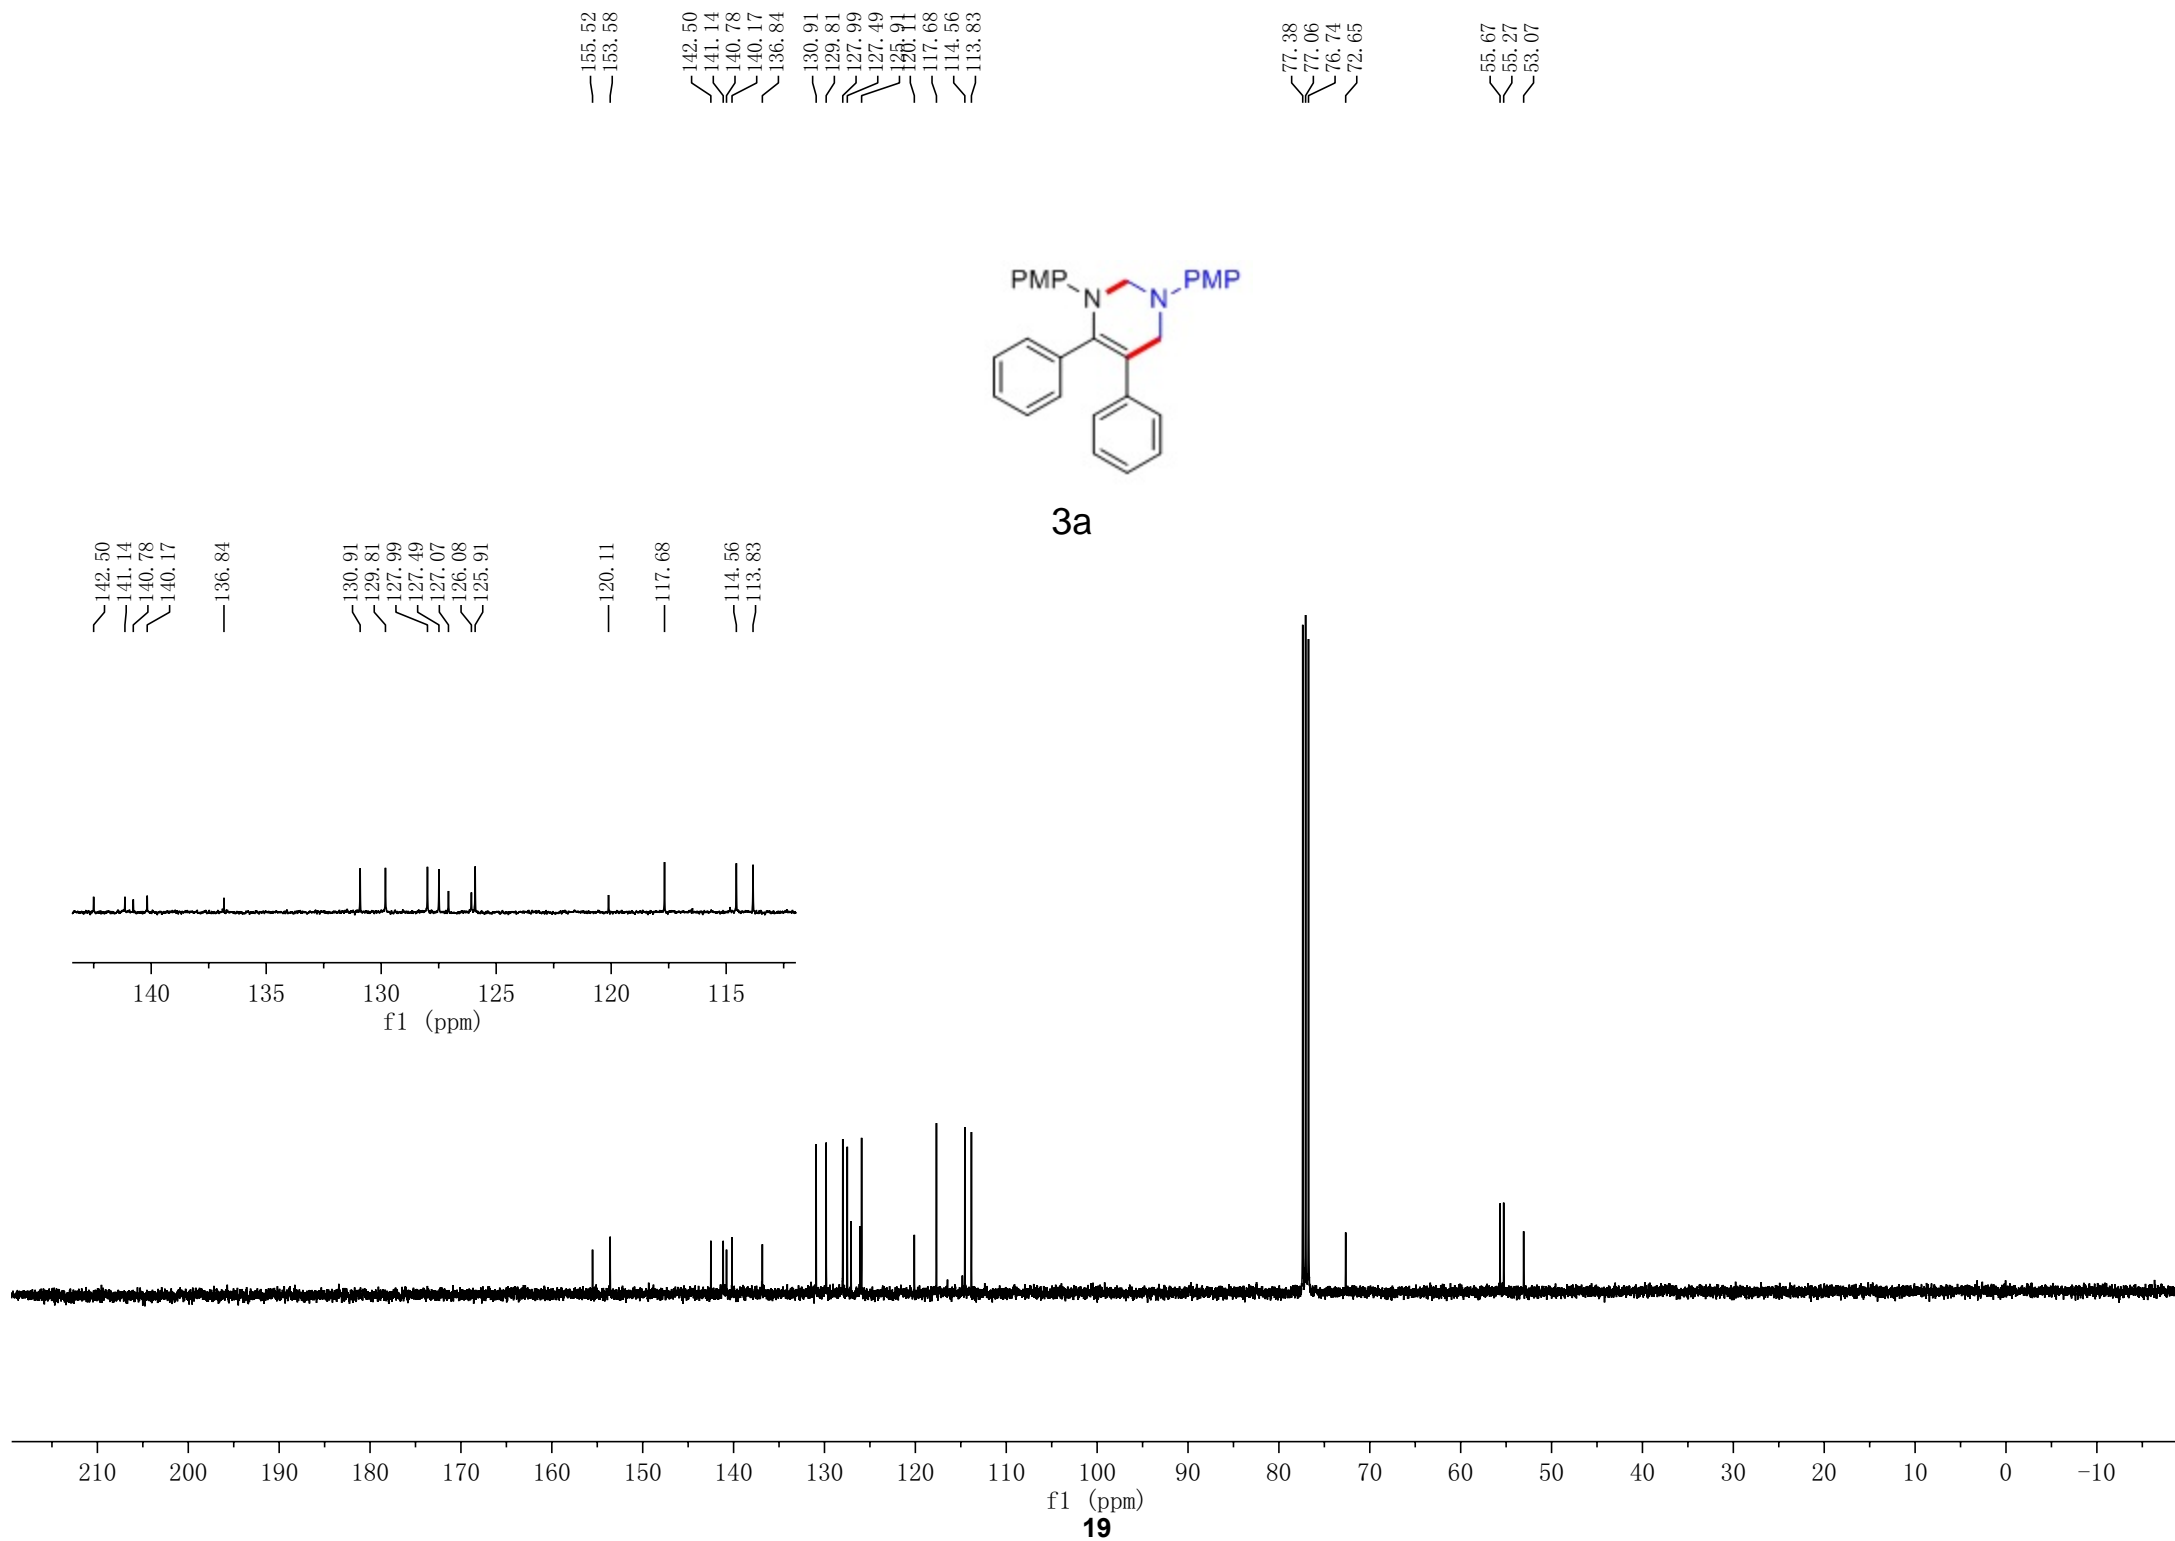

7.23  
7.20  
7.18  
7.18  
7.16  
7.15  
7.14  
7.14  
7.13  
7.12  
7.12  
7.11  
7.10  
7.05  
7.03  
6.93  
6.92  
6.91  
6.90  
6.90  
6.79  
6.77  
6.75  
6.65  
6.65  
6.64  
6.63  
6.62

— 4.79

— 4.12

— 3.71  
— 3.65

— 2.14

— 1.54

— -0.00

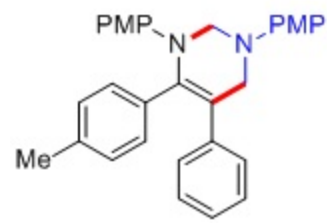

3b

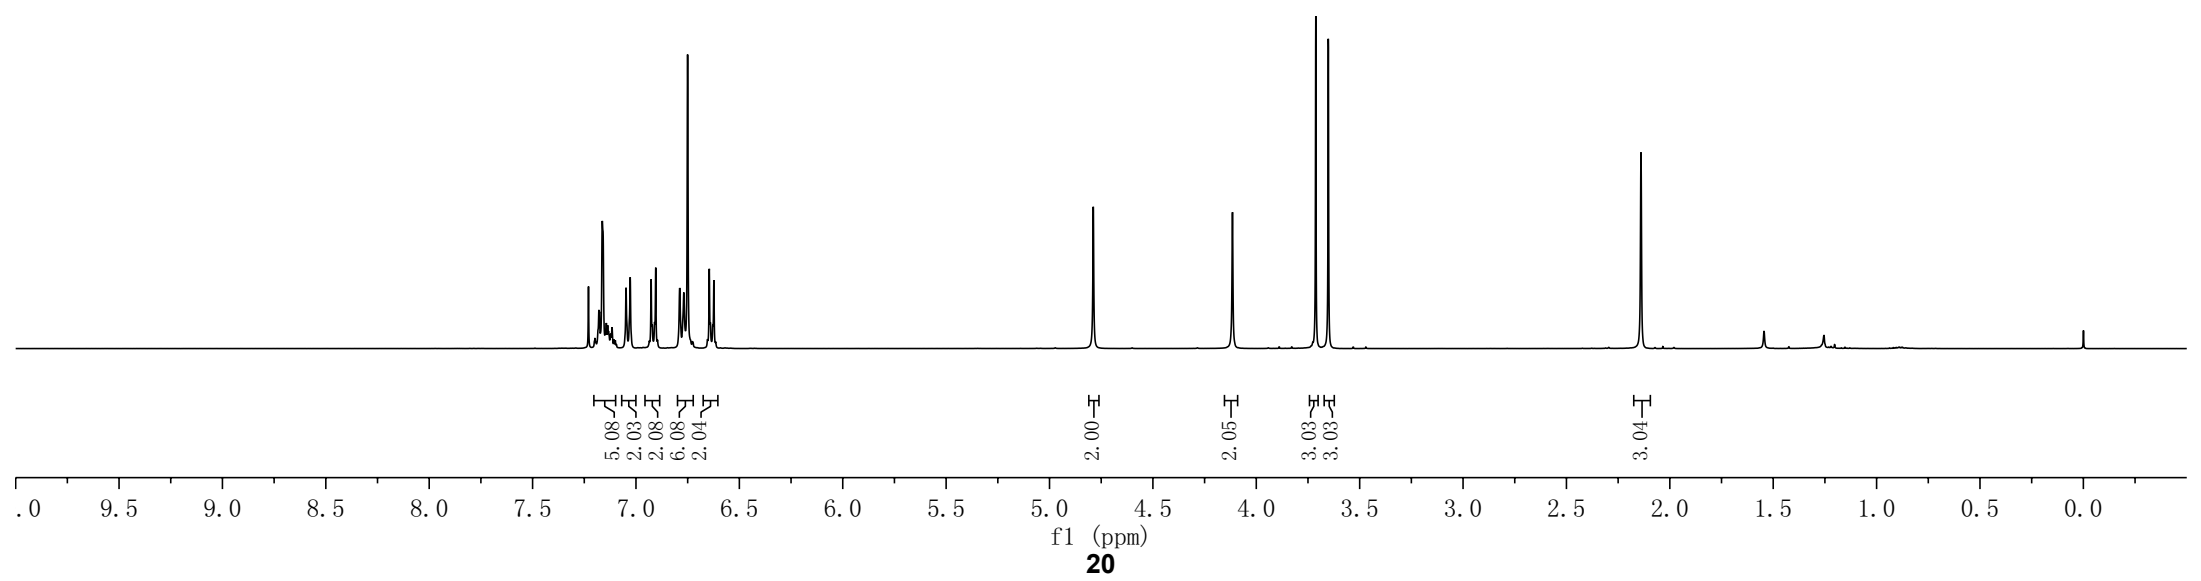

155.48  
153.54  
142.56  
141.33  
140.77  
140.42  
136.71  
133.86  
130.75  
129.79  
128.31  
128.00  
125.91  
119.64  
117.61  
114.57  
113.83

77.40  
77.08  
76.77  
72.63

55.67  
55.27  
53.09

21.21

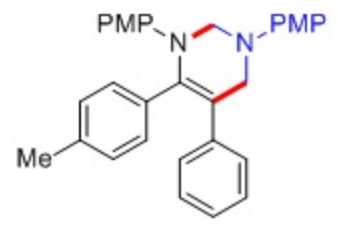

3b

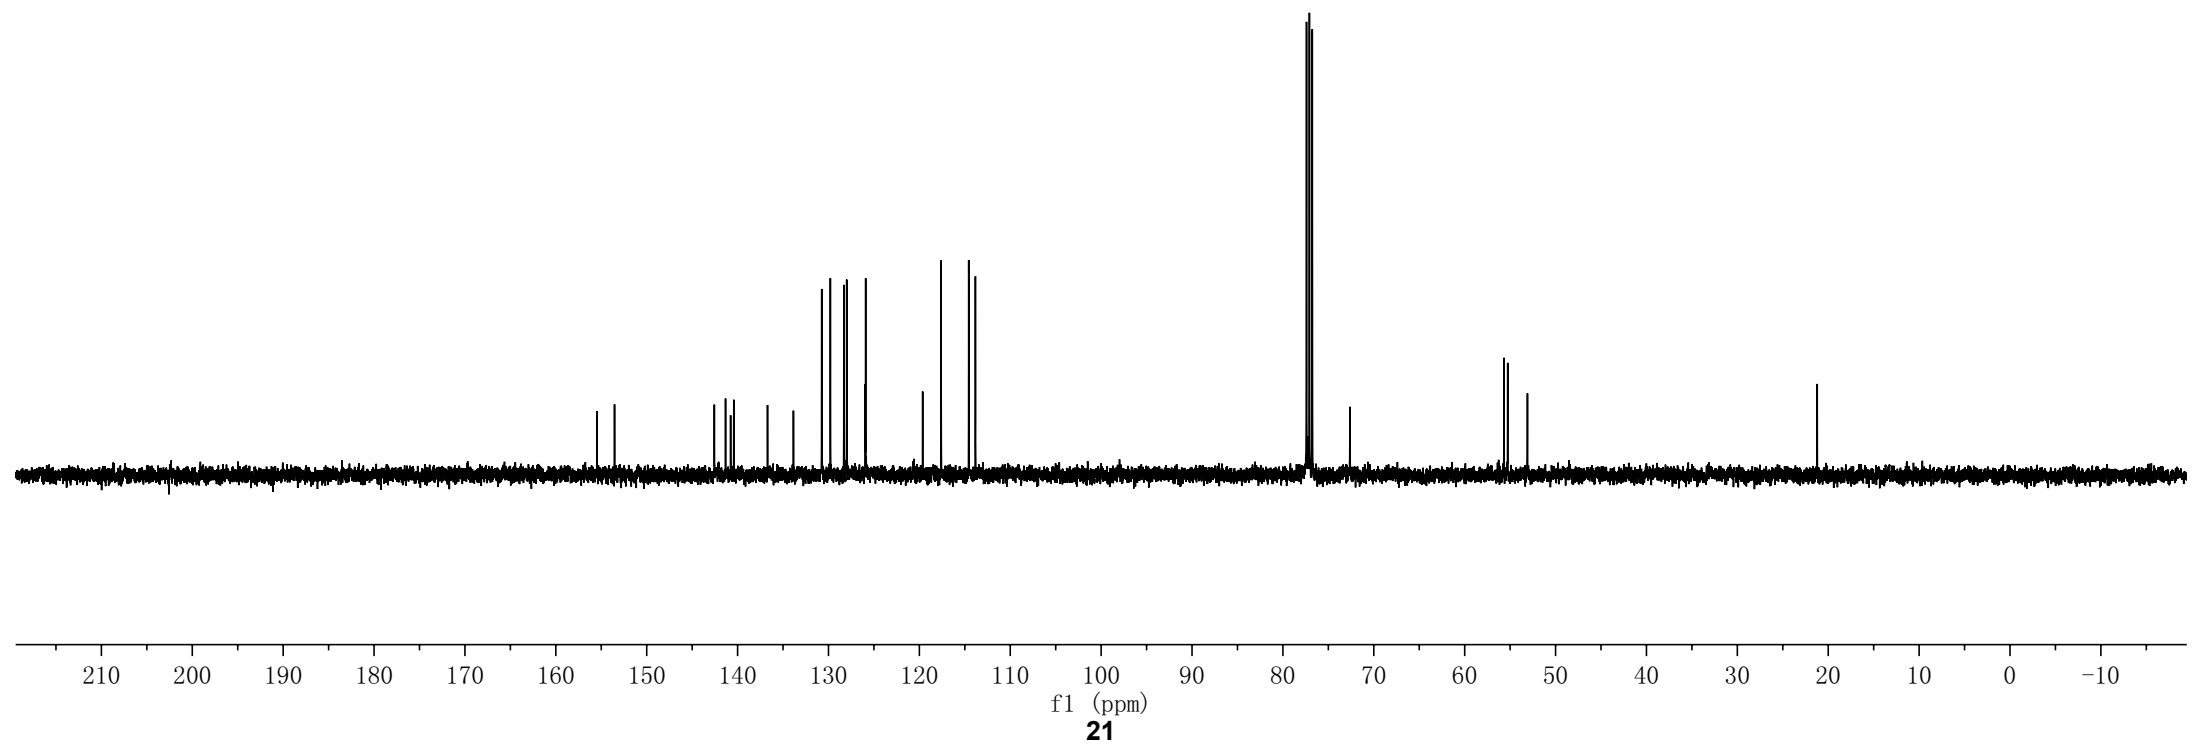

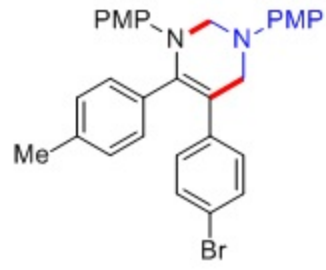

3c

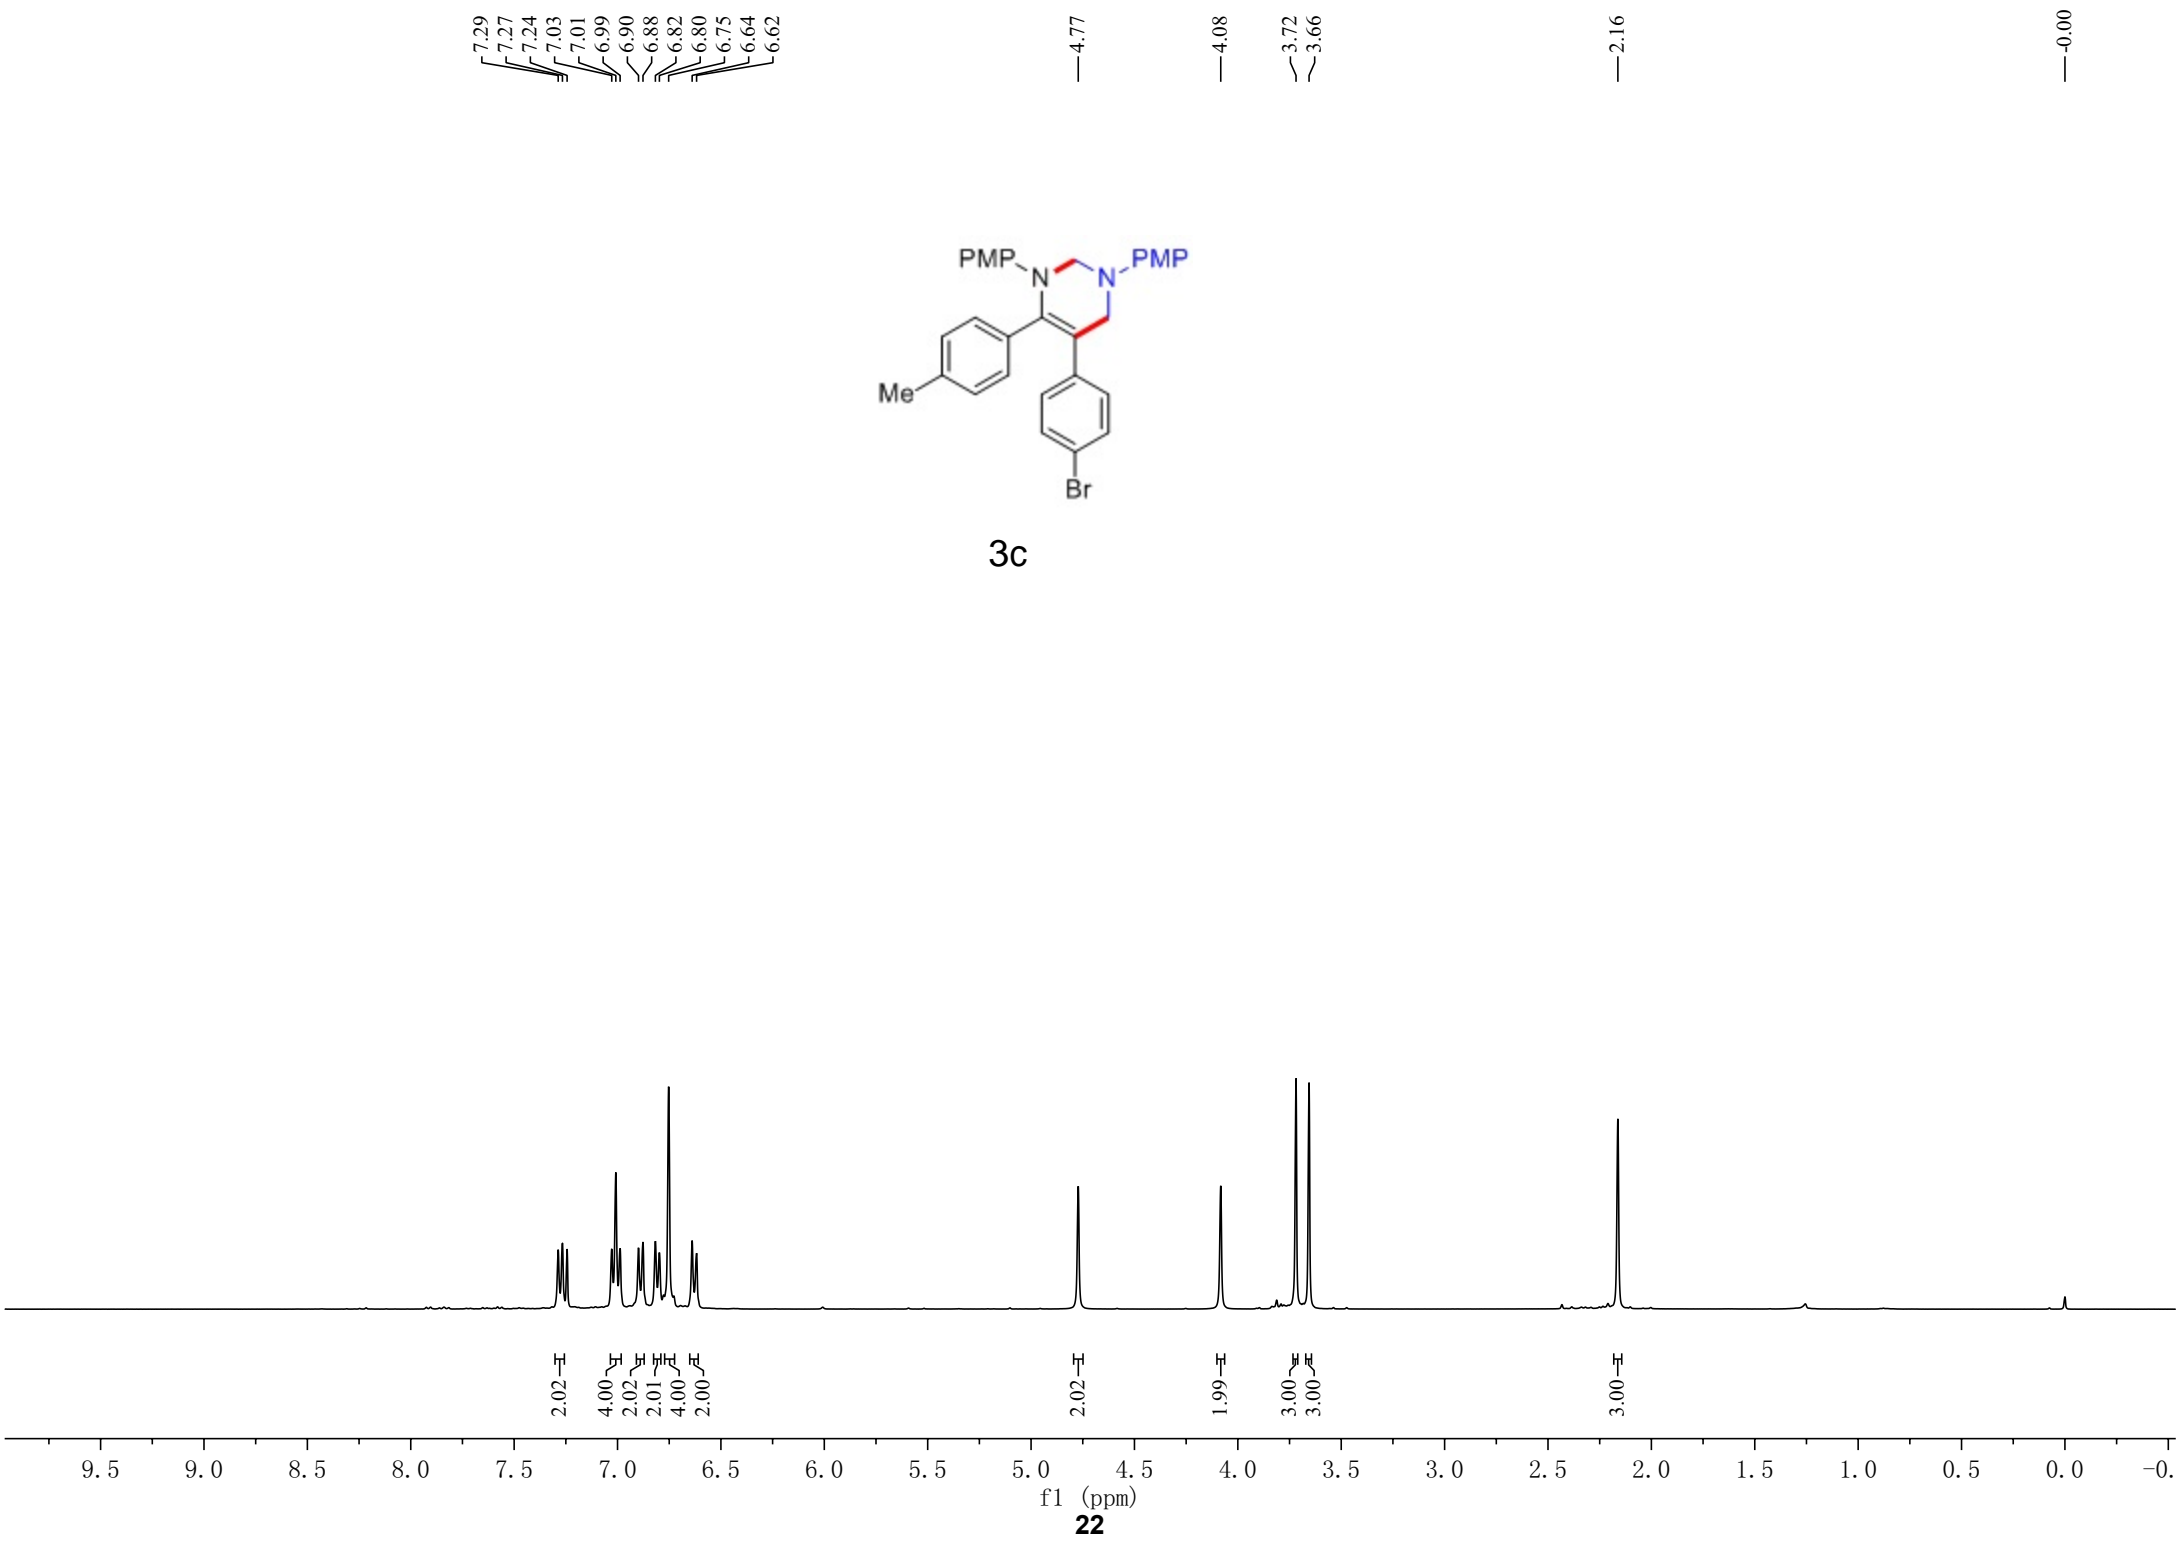

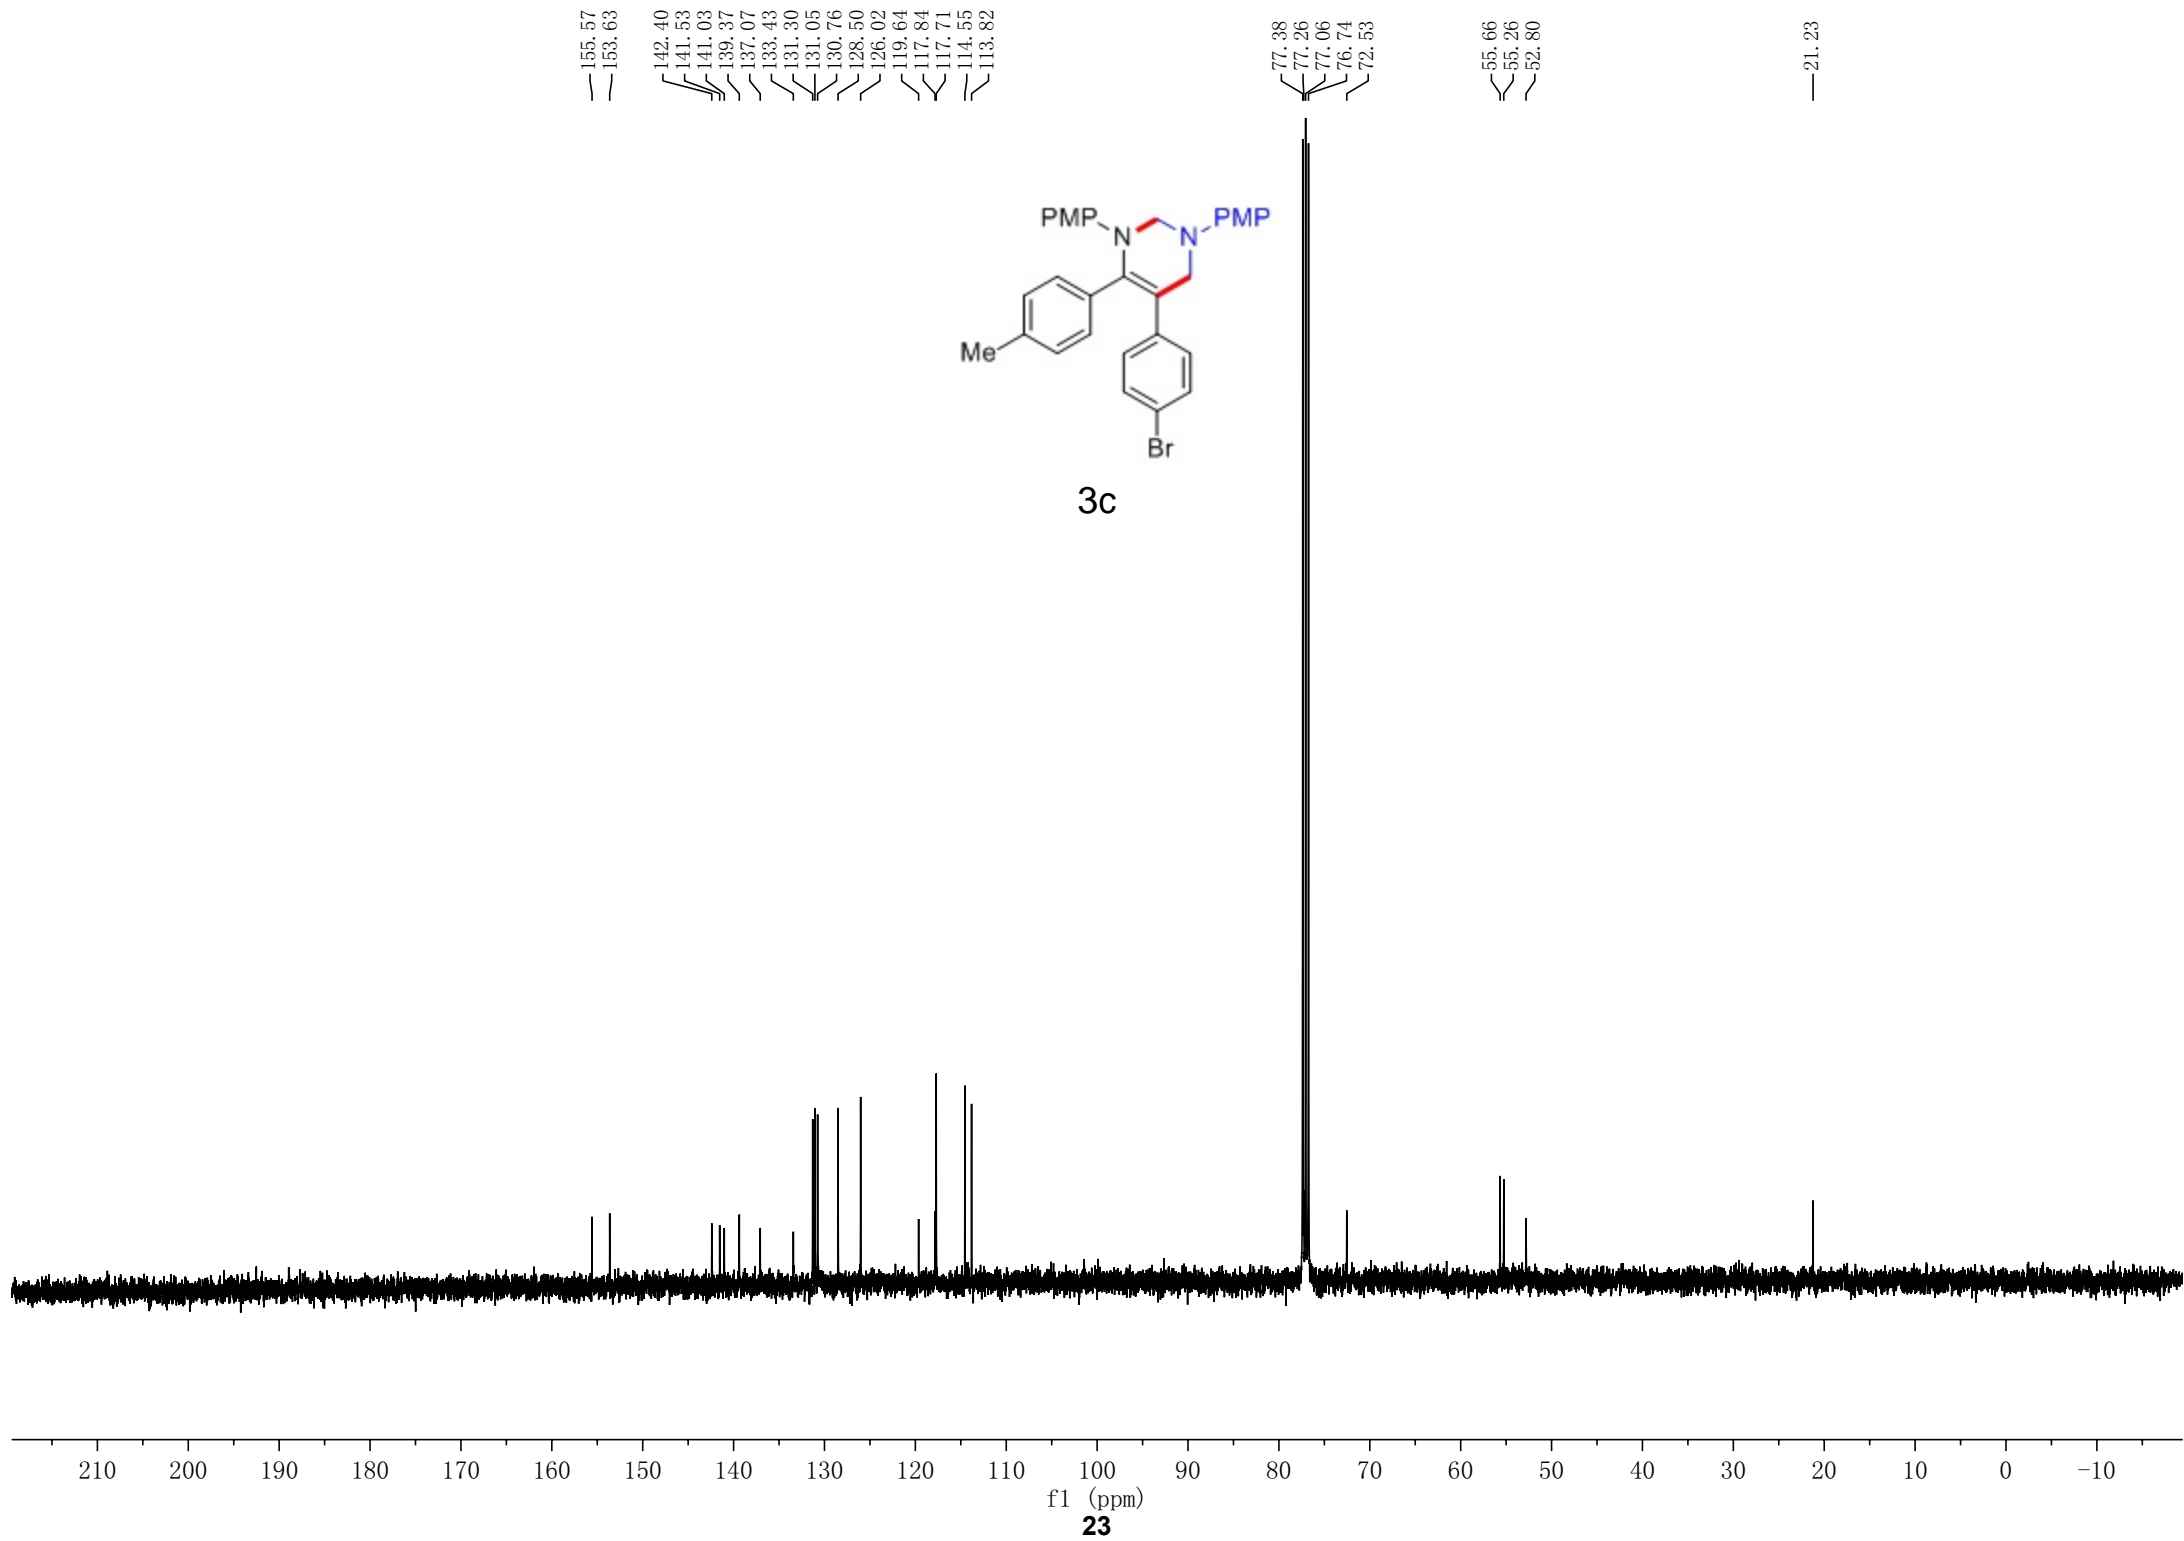

7.37  
7.36  
7.26  
7.13  
7.11  
7.03  
7.01  
6.94  
6.92  
6.75  
6.68  
6.65

4.88  
4.85  
4.79  
4.76  
4.21  
4.17  
3.84  
3.80  
3.72  
3.69

— 1.56

— 0.00

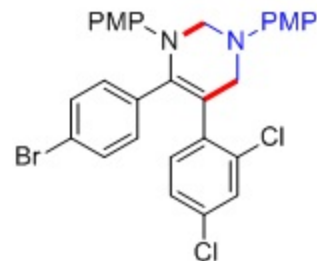

3d

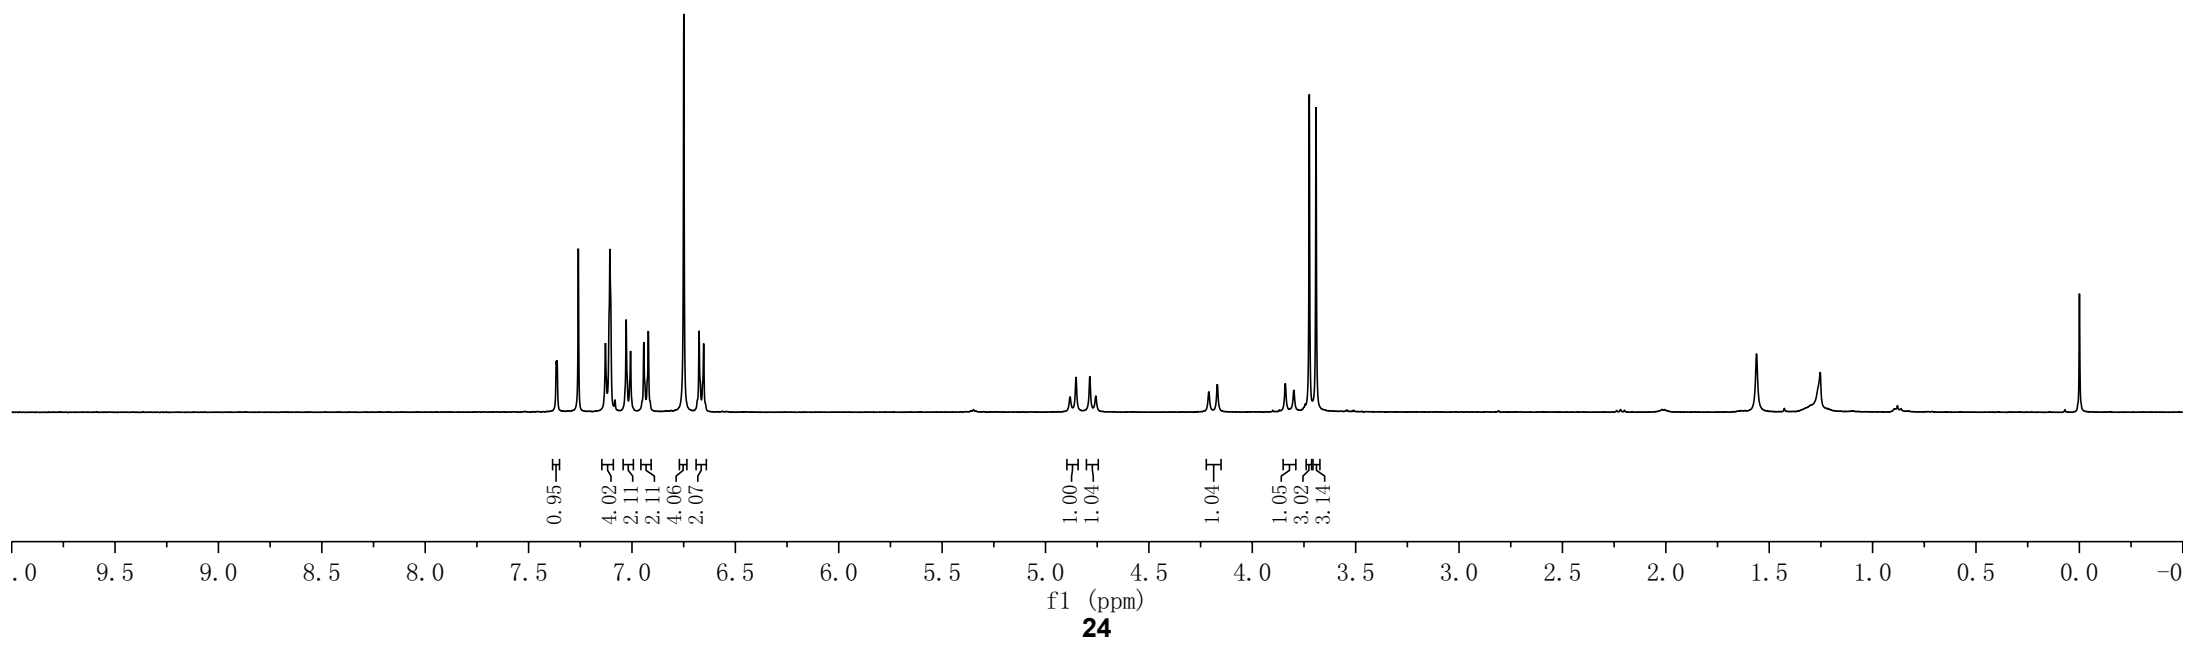



155.86  
153.78  
142.20  
141.32  
140.71  
137.33  
135.71  
135.41  
133.50  
133.44  
131.28  
130.85  
129.53  
127.30  
125.91  
121.56  
118.18  
118.03  
114.51  
114.02

77.37  
77.05  
76.74  
72.81

55.64  
55.30  
52.63

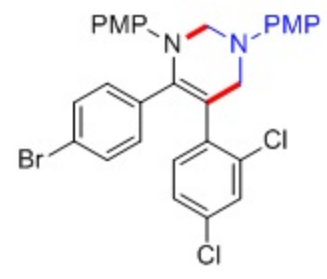

3d

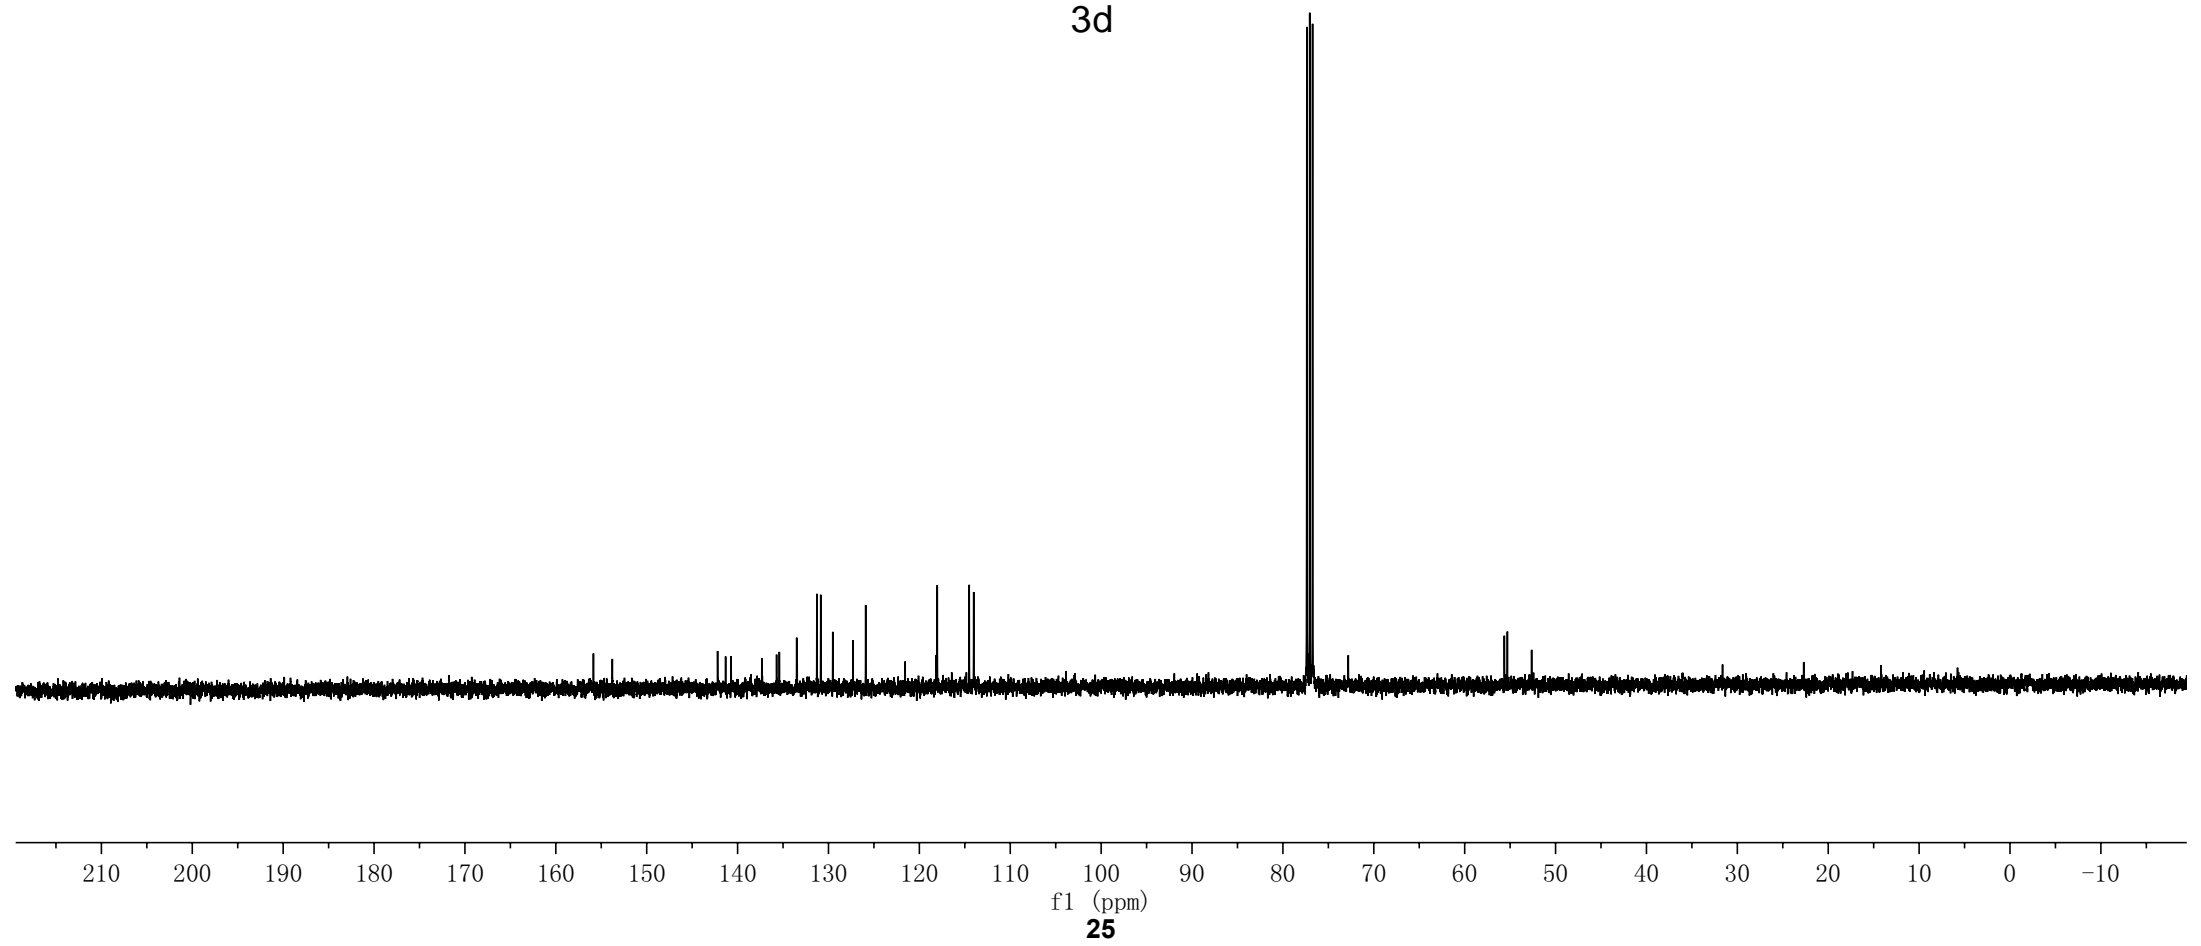

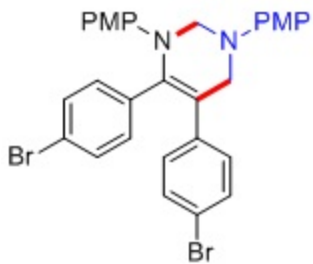

3e

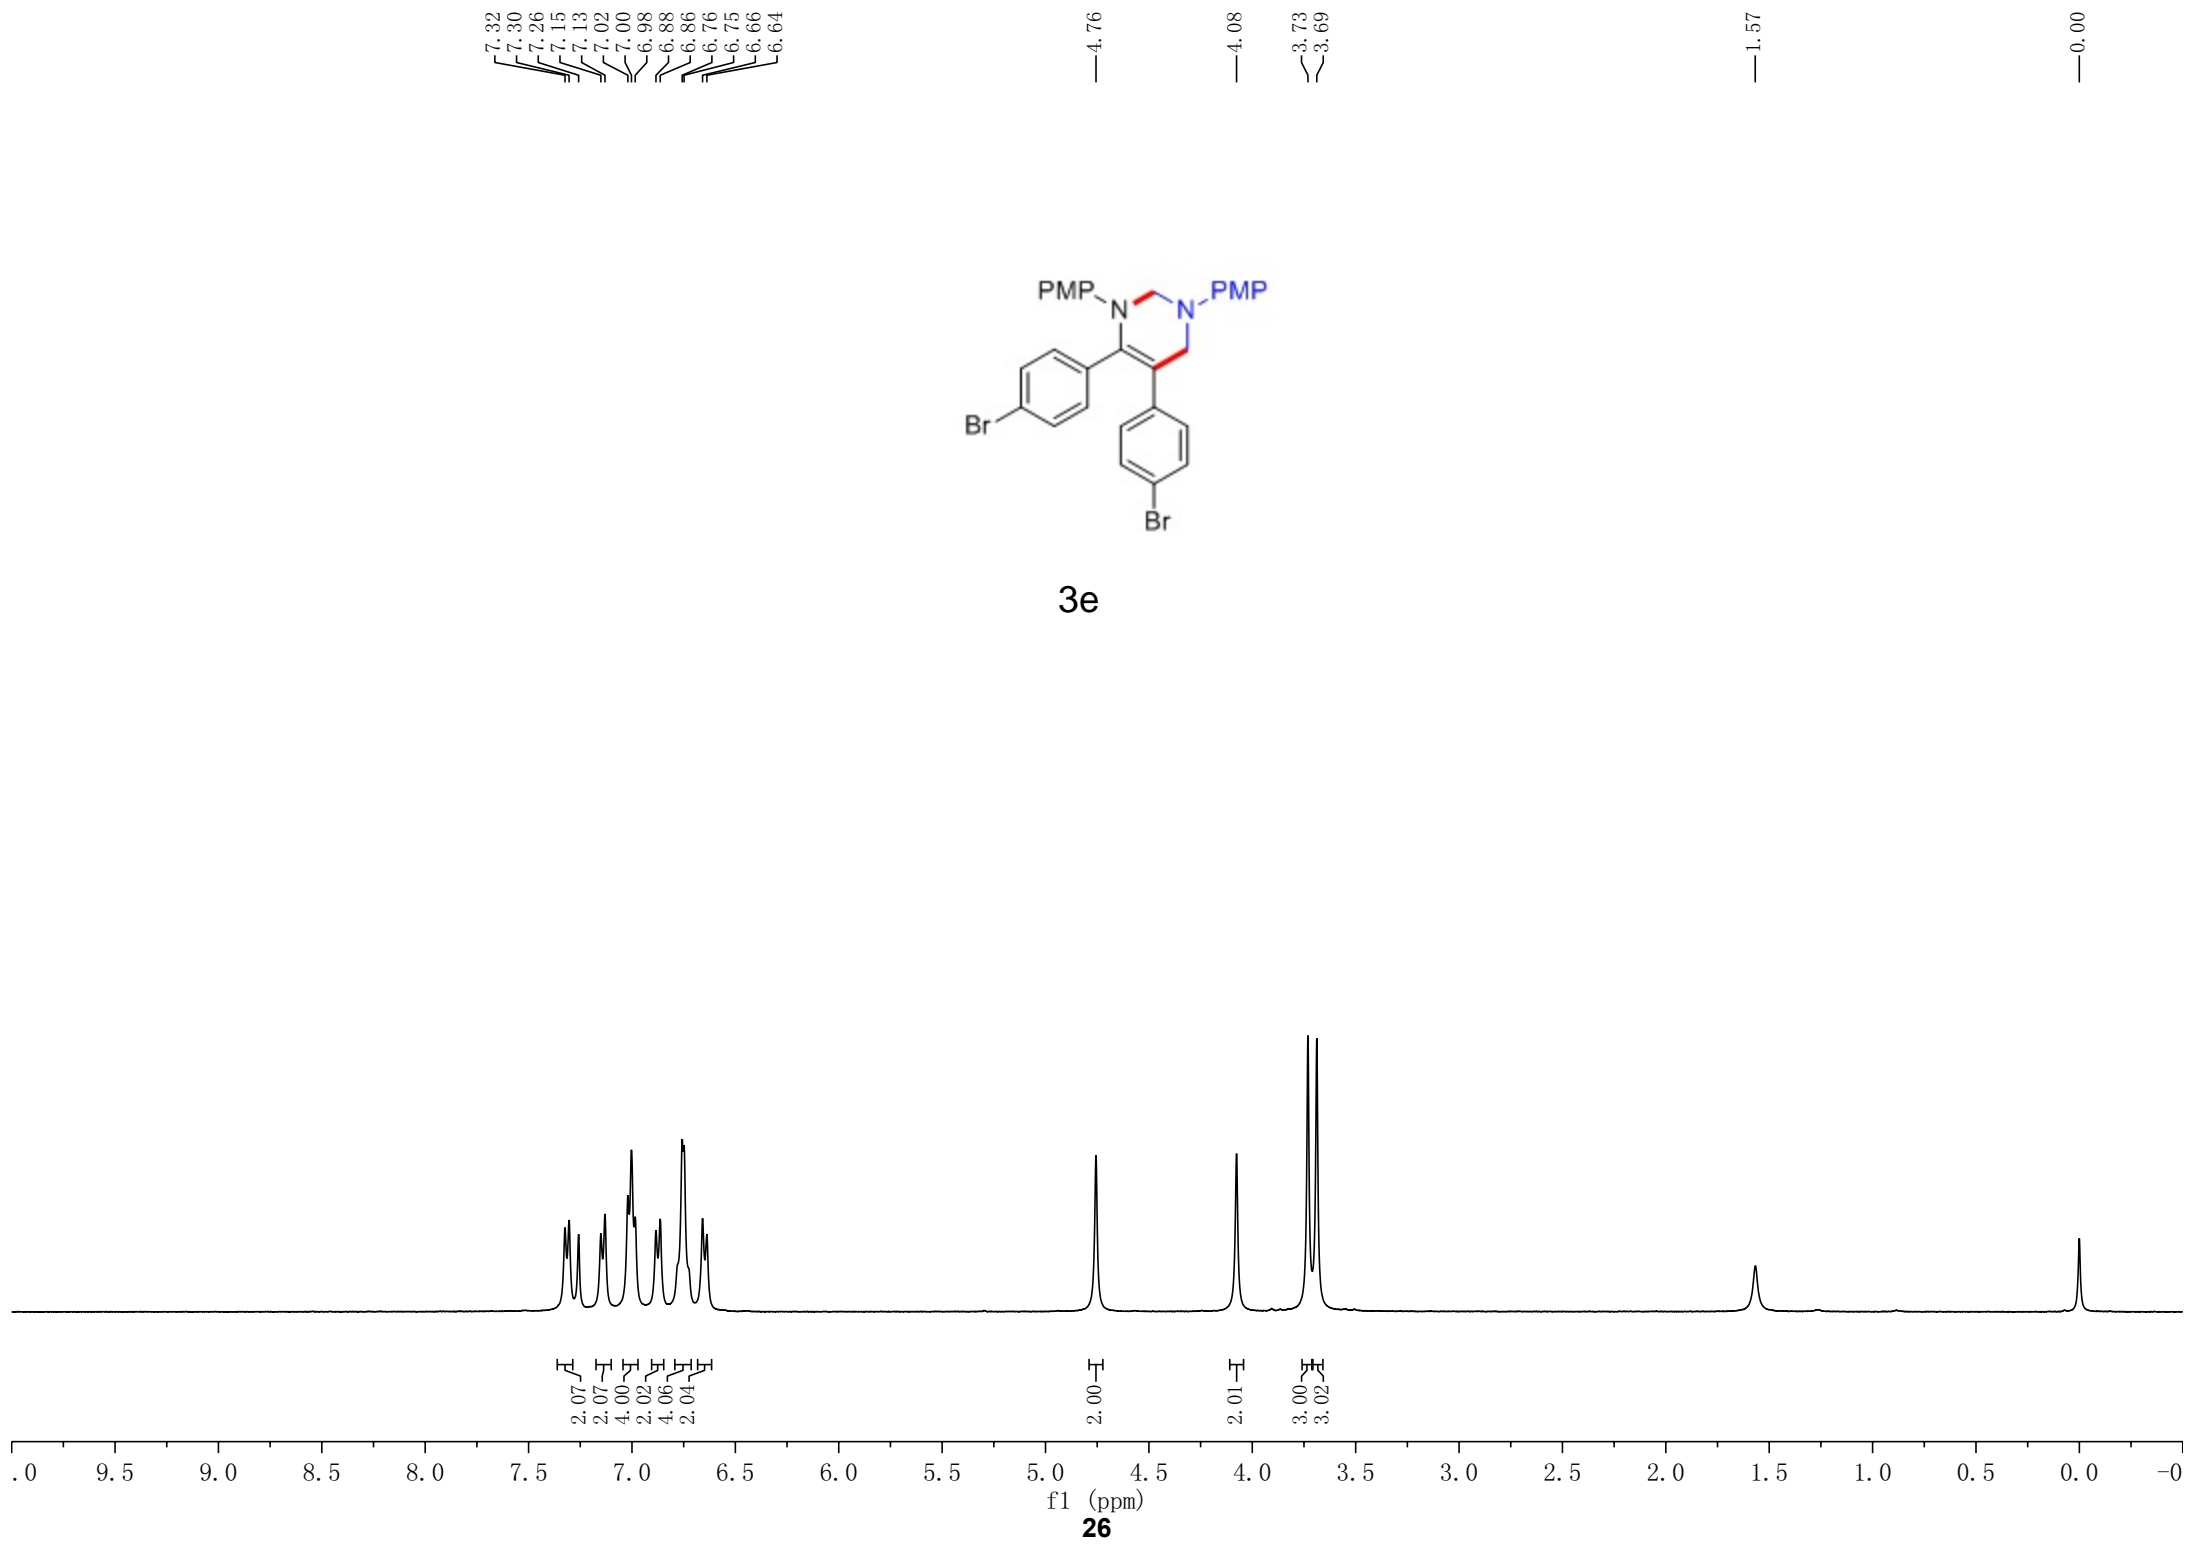

155.89  
153.79  
142.22  
140.58  
140.45  
138.70  
135.52  
132.41  
131.31  
131.00  
127.53  
126.11  
121.39  
120.17  
119.19  
117.82  
114.58  
113.98

77.39  
77.07  
76.75  
72.63

55.65  
55.30  
52.86

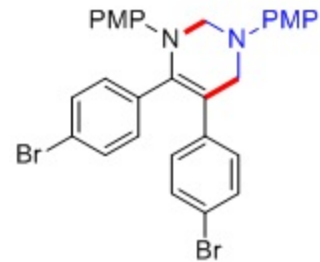

3e

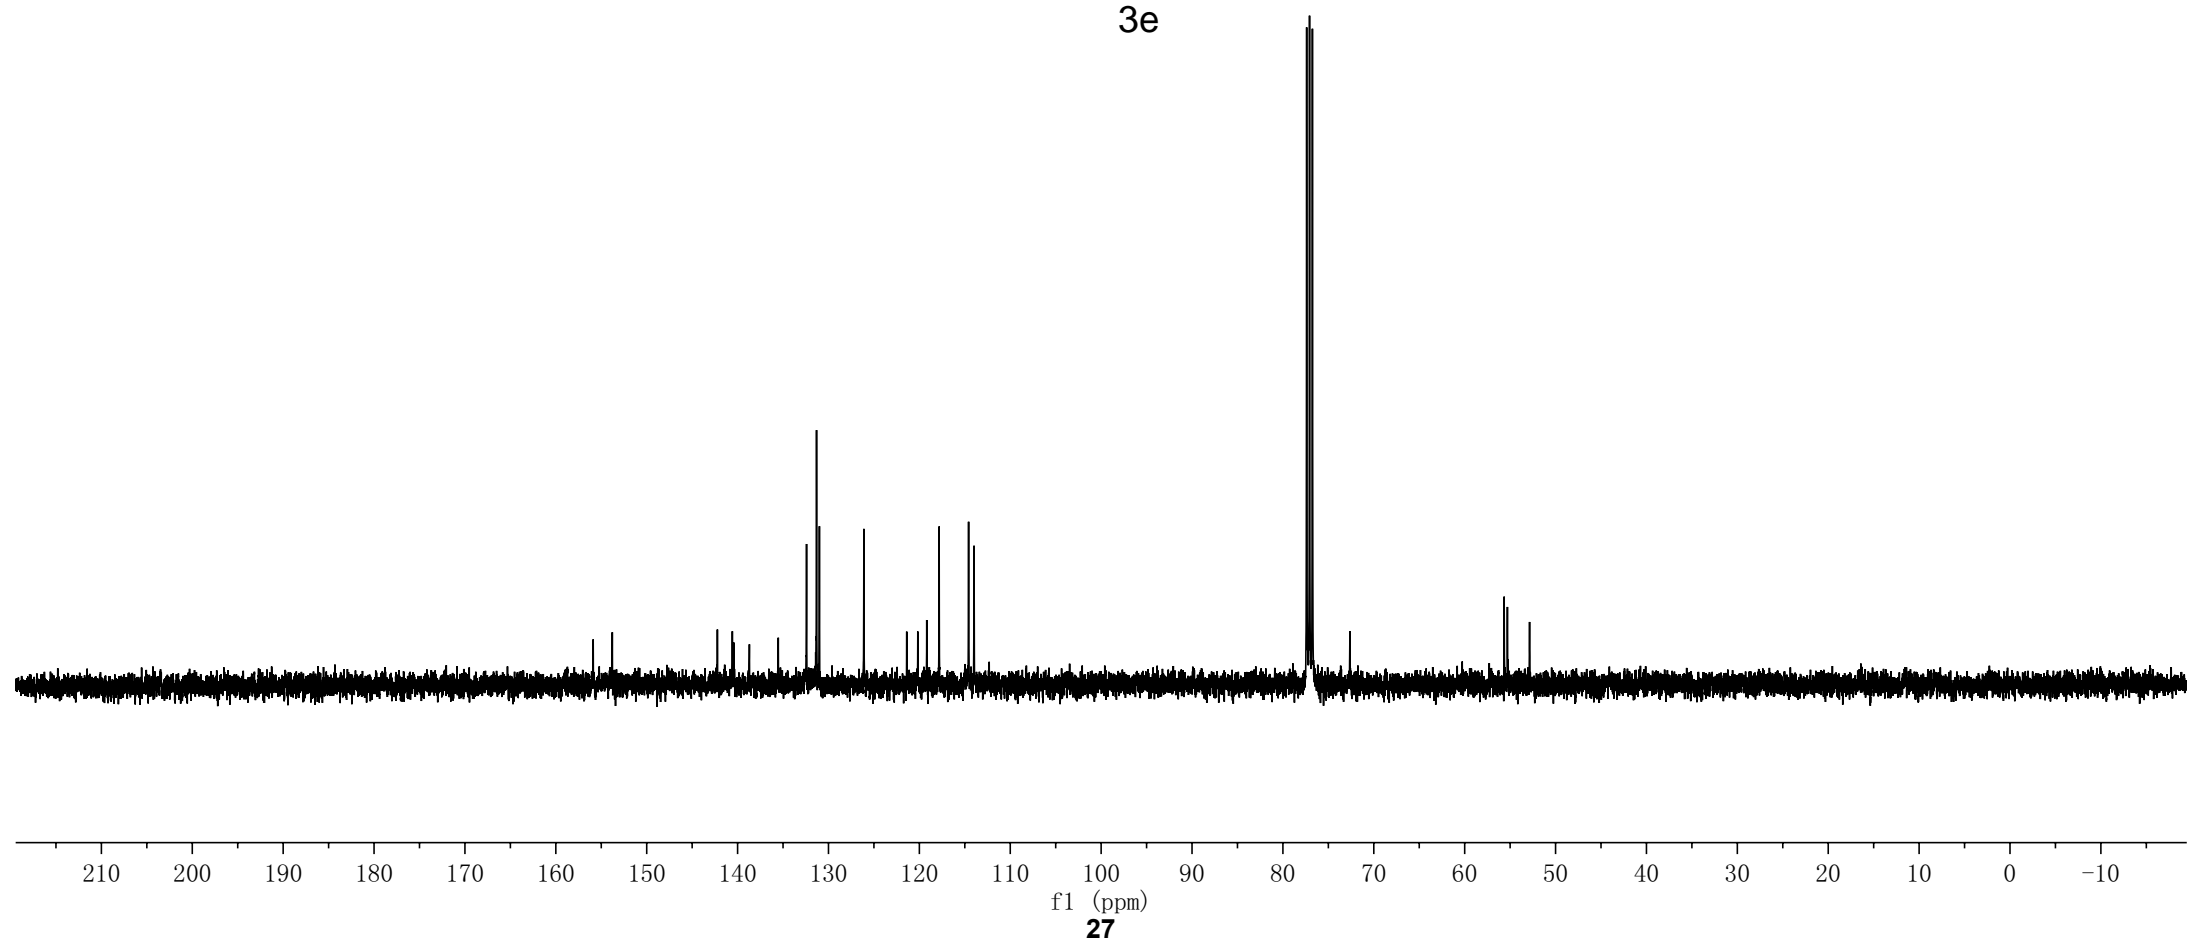

7.25  
7.12  
7.12  
7.10  
7.08  
7.06  
7.05  
7.04  
7.03  
6.95  
6.93  
6.92  
6.91  
6.86  
6.84  
6.82  
6.80  
6.79  
6.78  
6.77  
6.61  
6.61  
6.60  
6.59  
6.58

4.86  
4.84  
4.80  
4.77  
4.27  
4.23  
4.20  
4.16  
3.74  
3.65

2.17

1.56

0.00

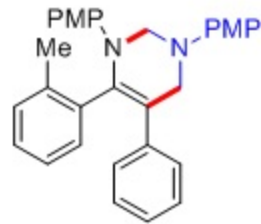

3f

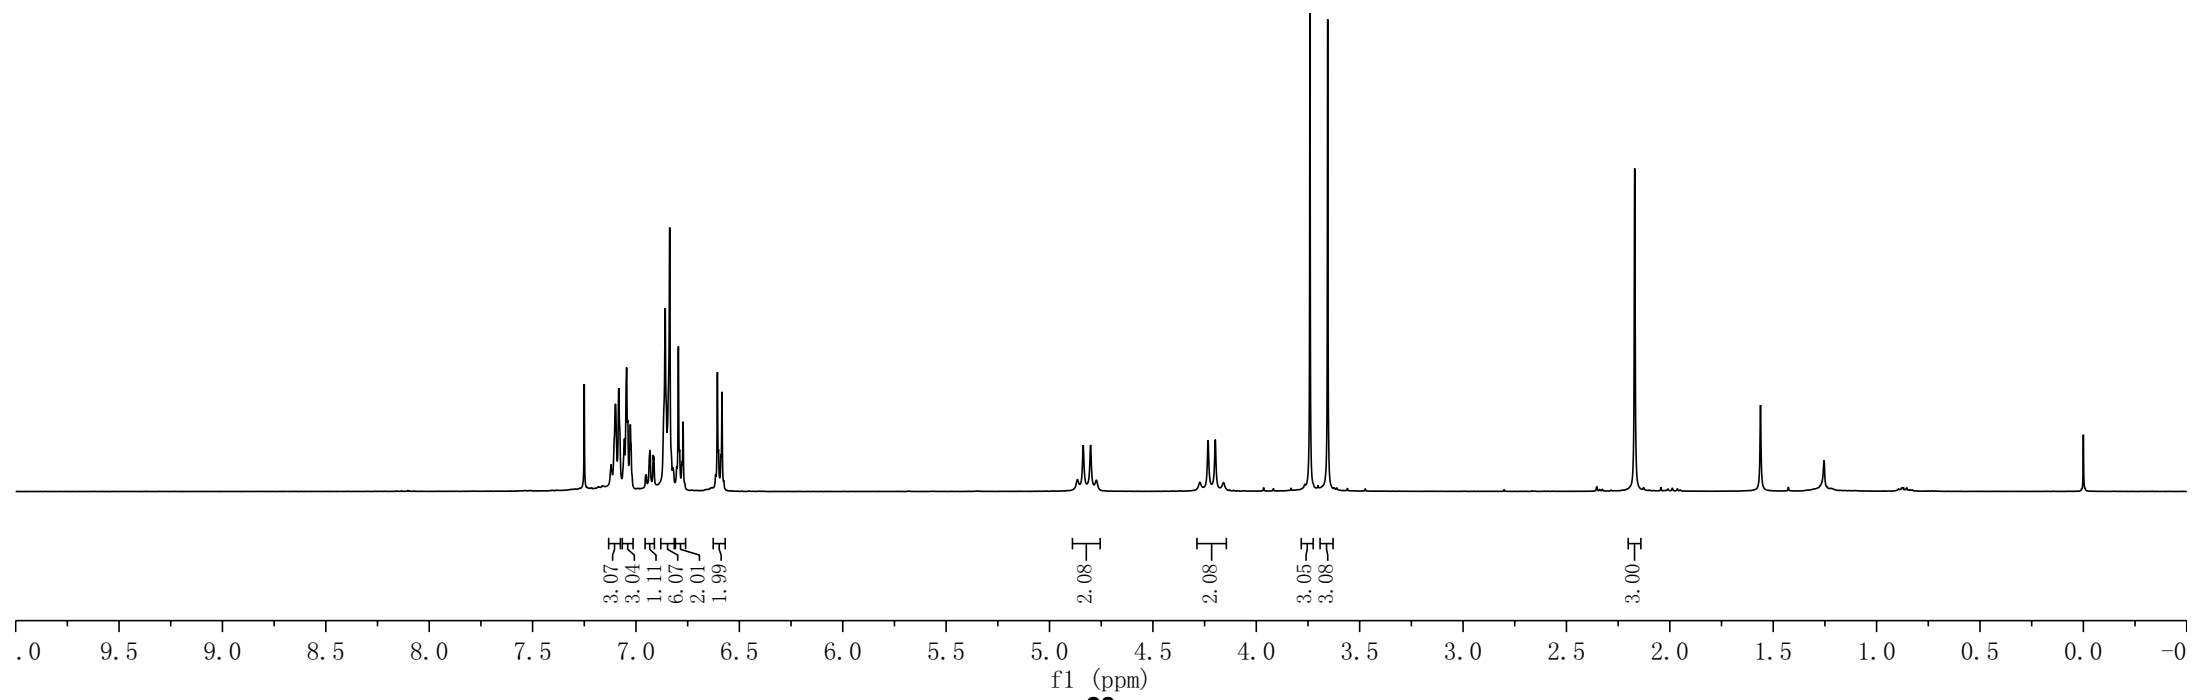

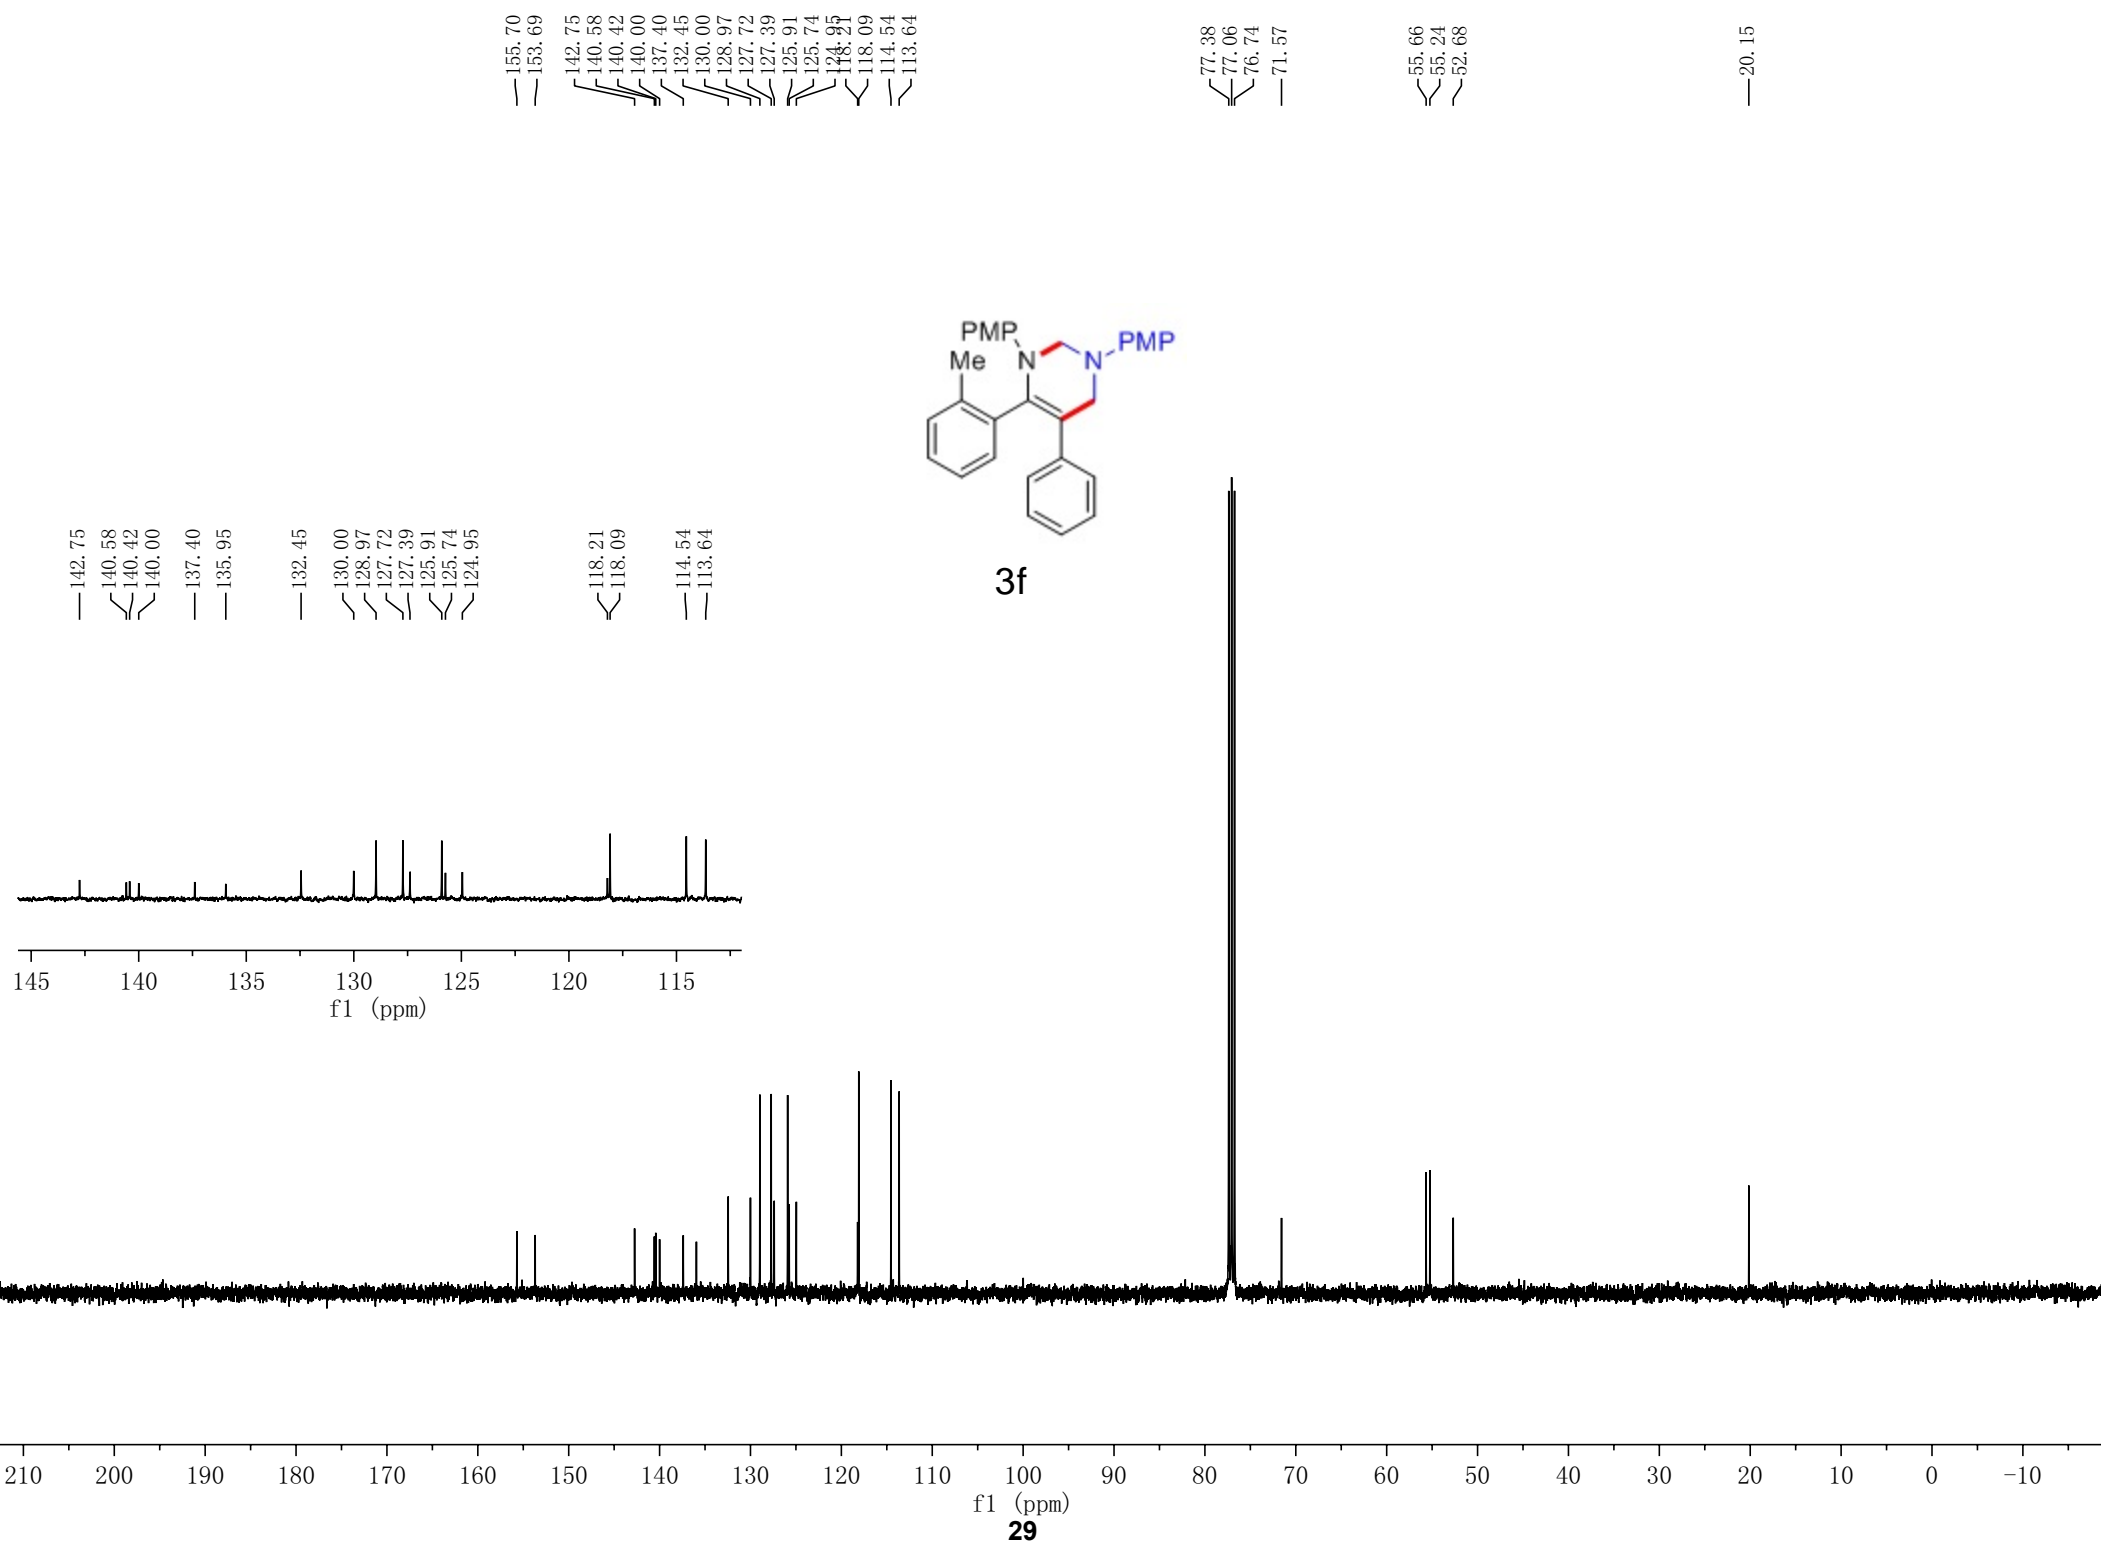

7.43  
7.42  
7.41  
7.28  
7.27  
7.25  
7.23  
7.18  
7.17  
7.15  
7.15  
6.94  
6.94  
6.93  
6.92  
6.91  
6.81  
6.80  
6.79  
6.78  
6.78  
6.78  
6.75  
6.75  
6.74  
6.73  
6.72  
6.68  
6.67  
6.67  
6.66  
6.65

4.74

3.77  
3.76  
3.69

1.92

1.59

0.03

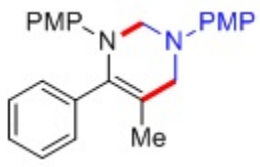

3g

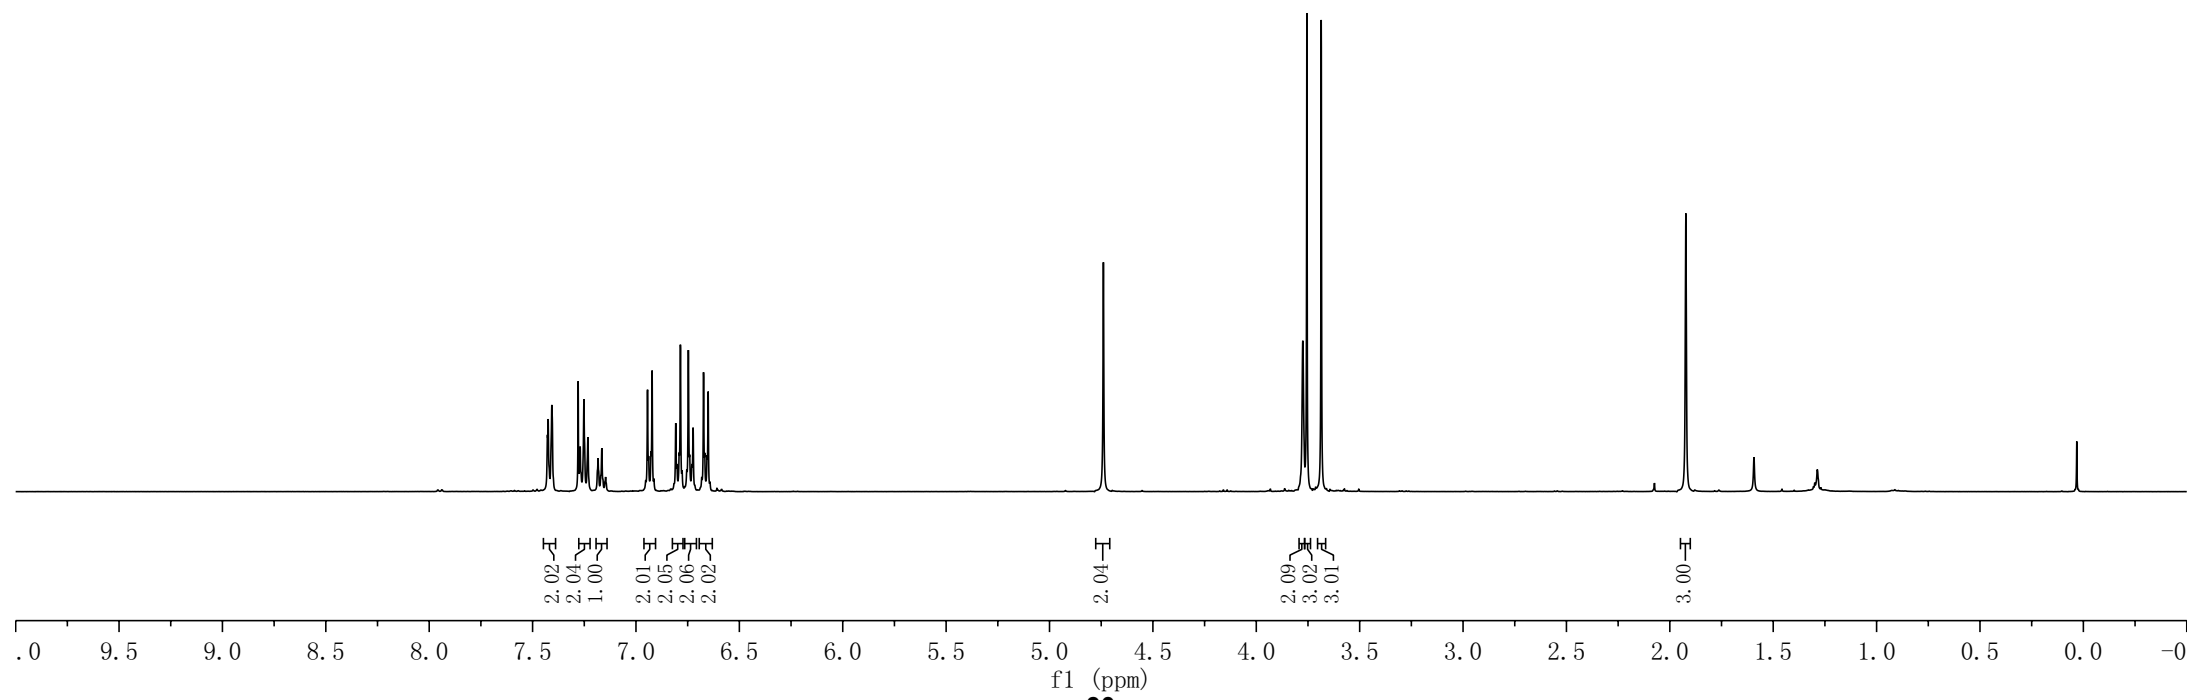

155.20  
153.27

142.70  
141.82  
137.96  
137.42

130.02  
127.70  
127.15  
125.28

117.17  
115.32  
114.53  
113.79

77.39  
77.27  
77.07  
76.75  
72.41

55.68  
55.28  
53.66

17.54

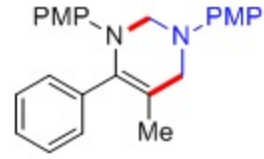

3g

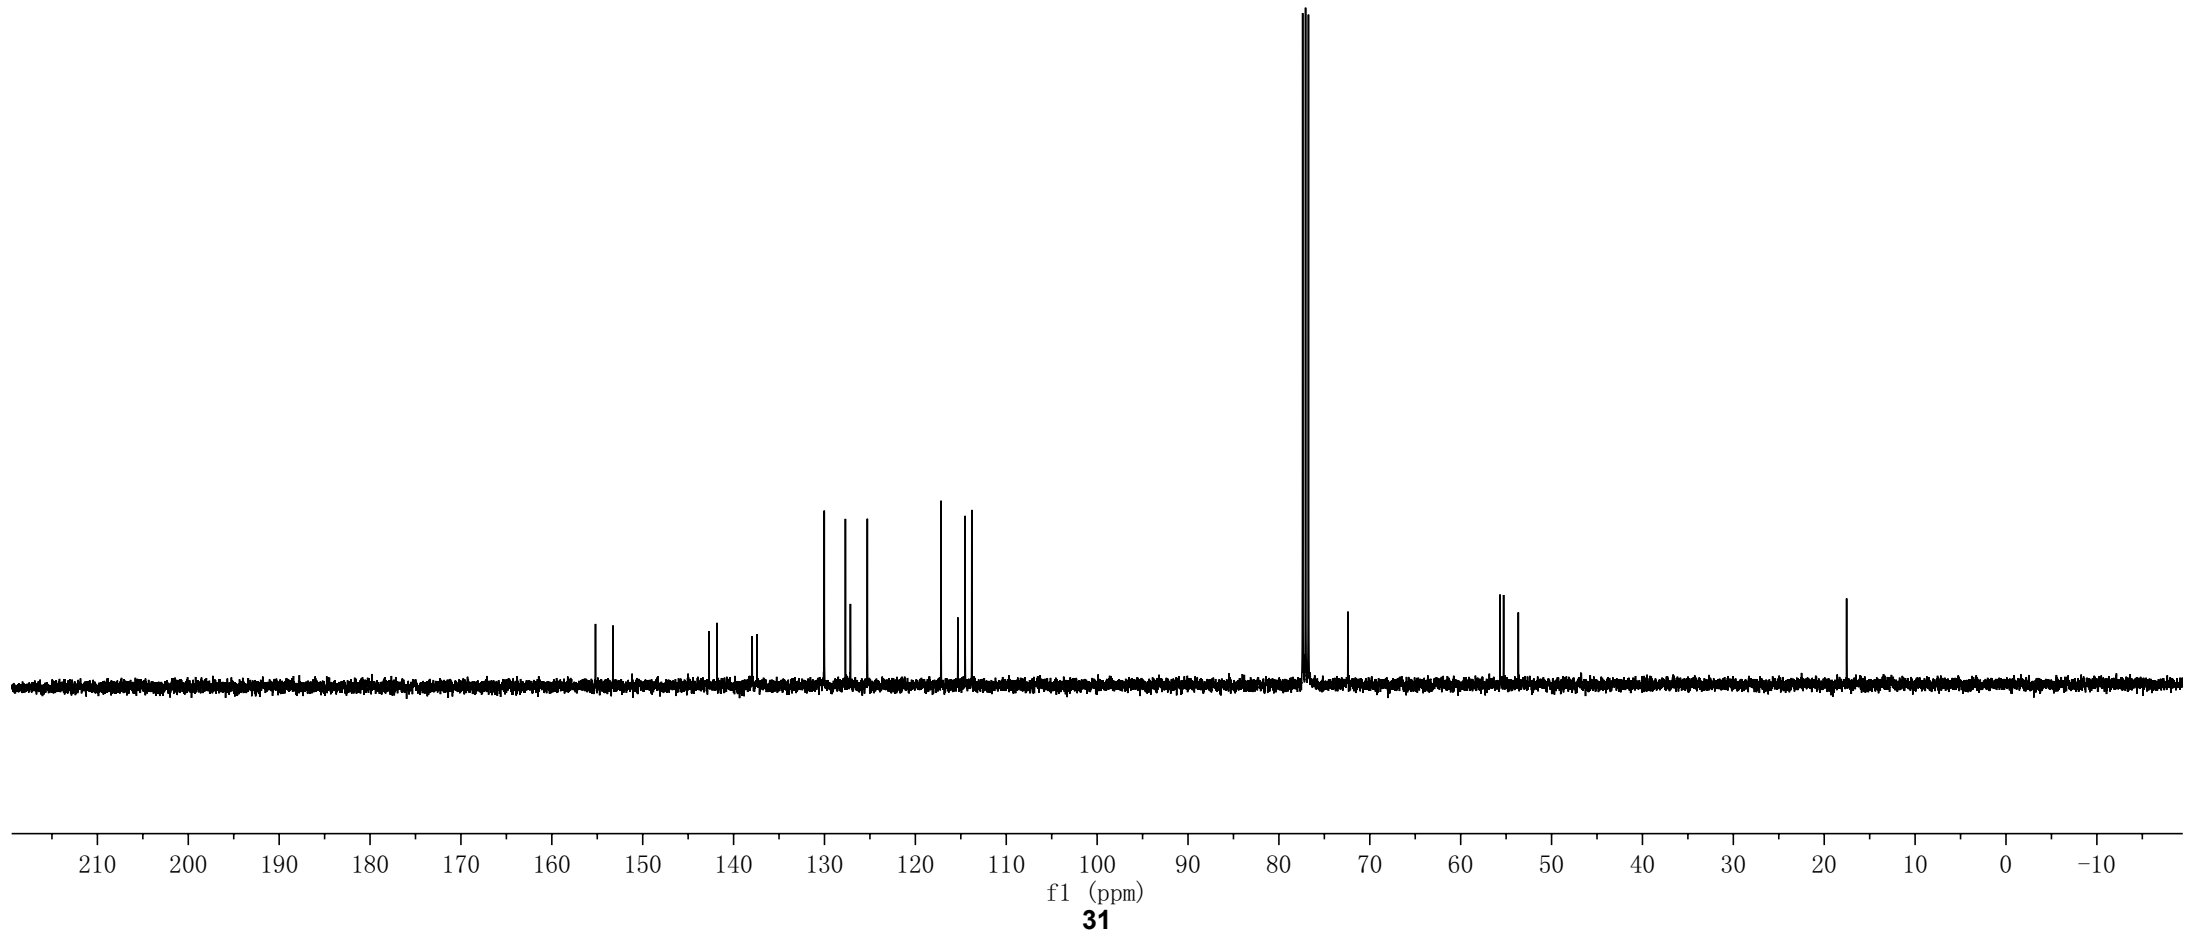

7.37  
7.37  
7.35  
7.34  
7.25  
7.23  
7.23  
7.22  
7.21  
7.20  
7.18  
7.16  
7.15  
7.15  
7.14  
7.13  
6.91  
6.90  
6.89  
6.88  
6.87  
6.78  
6.76  
6.75  
6.74  
6.74  
6.73  
6.72  
6.71  
6.70  
6.65  
6.64  
6.63  
6.61  
6.61

4.69

3.80  
3.72  
3.65

2.24  
2.21  
2.19

1.58  
1.57  
1.56  
1.55  
1.52  
1.33  
1.31  
1.28  
0.90  
0.88  
0.85

-0.00

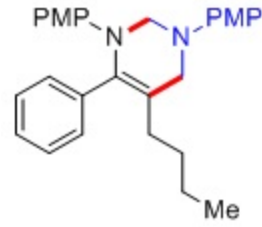

3h

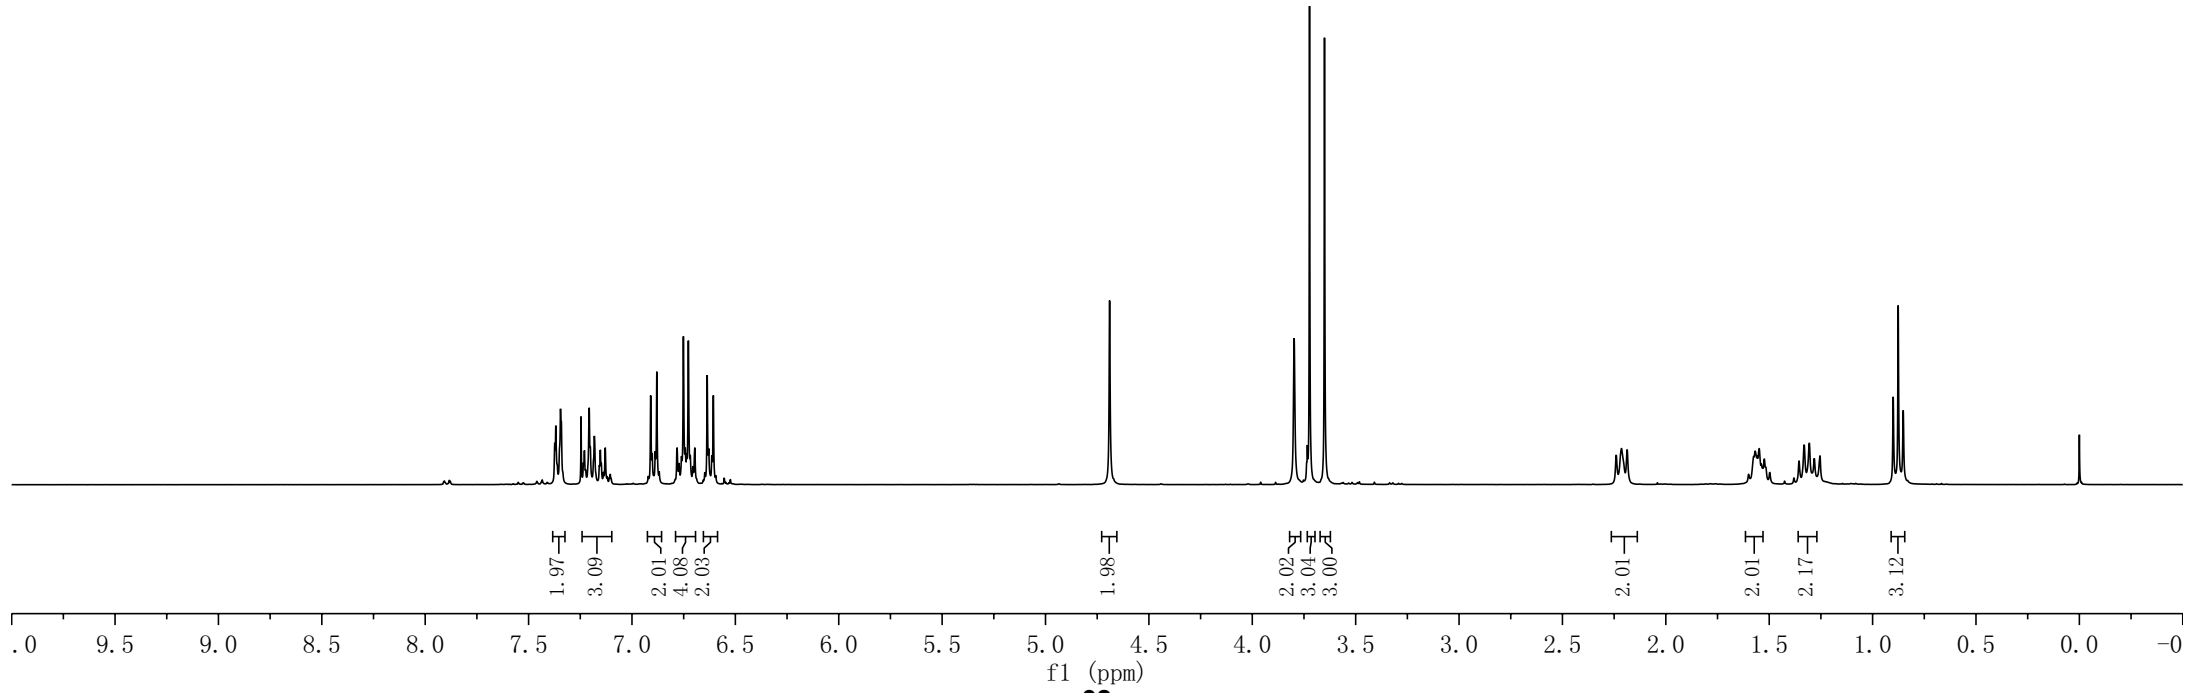



155.23  
153.27

142.86  
141.69  
138.44  
137.57

129.88  
127.66  
127.18  
125.38

119.92  
117.23  
114.53  
113.75

77.48  
77.06  
76.63  
72.24

55.68  
55.26  
51.65

32.20  
30.96

22.72

14.00

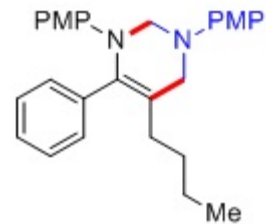

3h

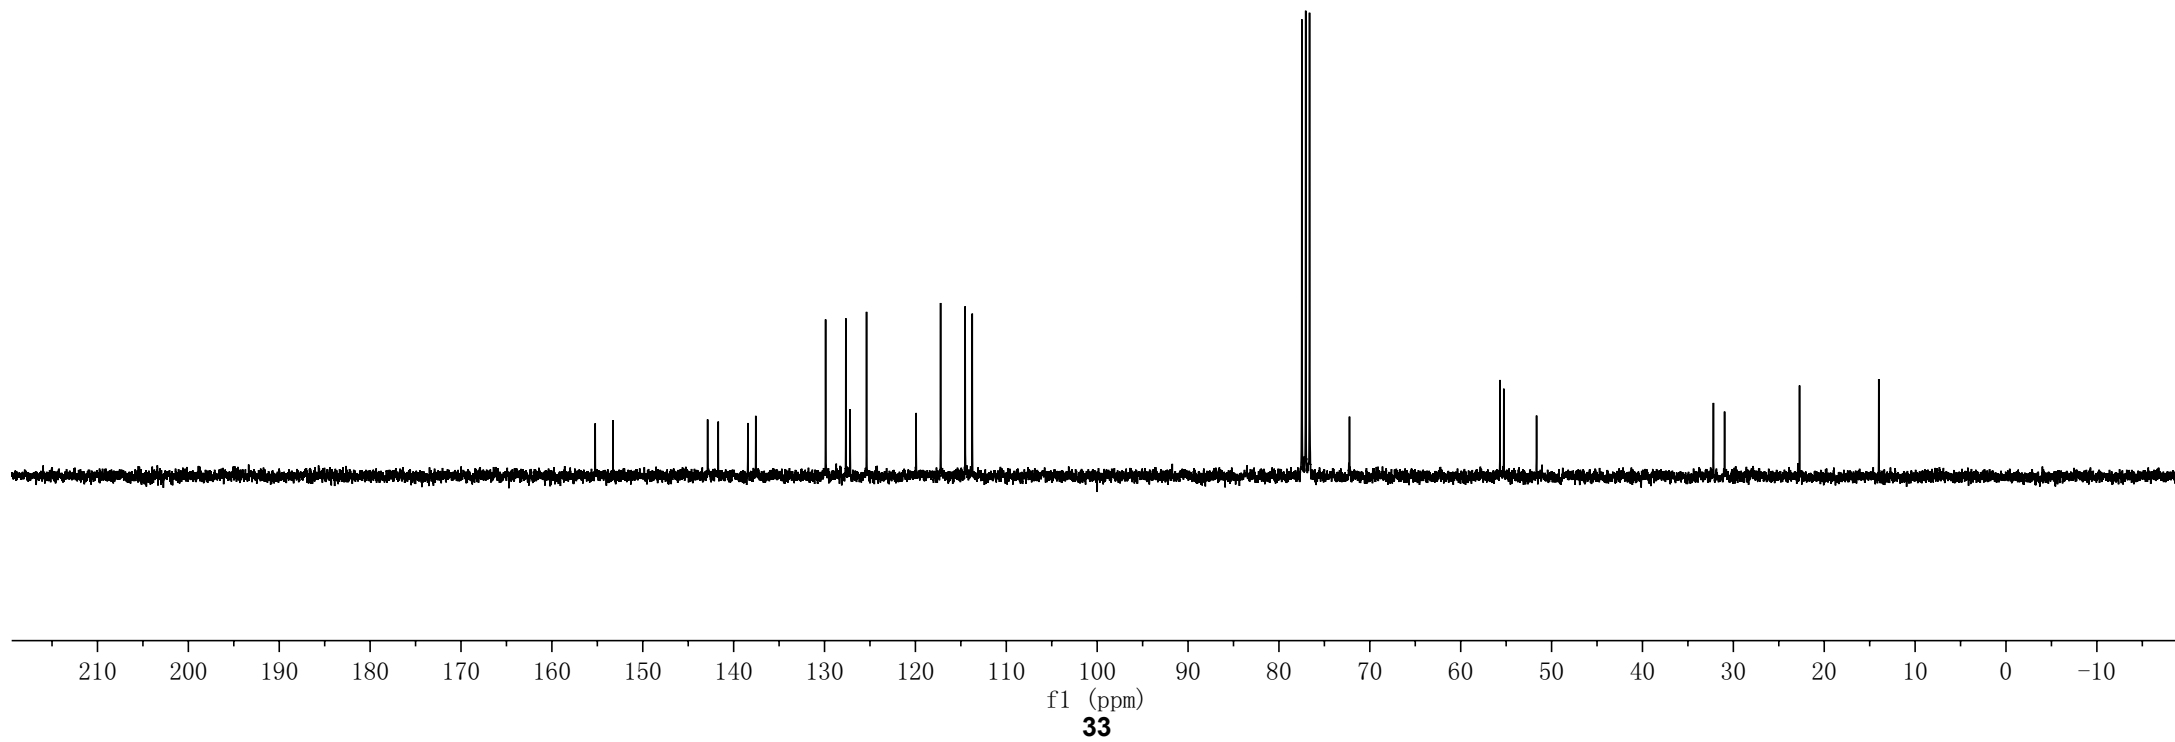

7.26  
7.13  
6.93  
6.90  
6.80  
6.77  
6.63  
6.63  
6.61  
6.53  
6.51

4.84

4.27

3.93  
3.91  
3.90  
3.88  
3.75  
3.64

0.88  
0.87  
0.85

0.00

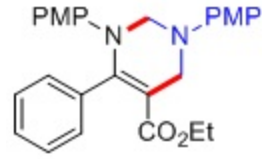

3i

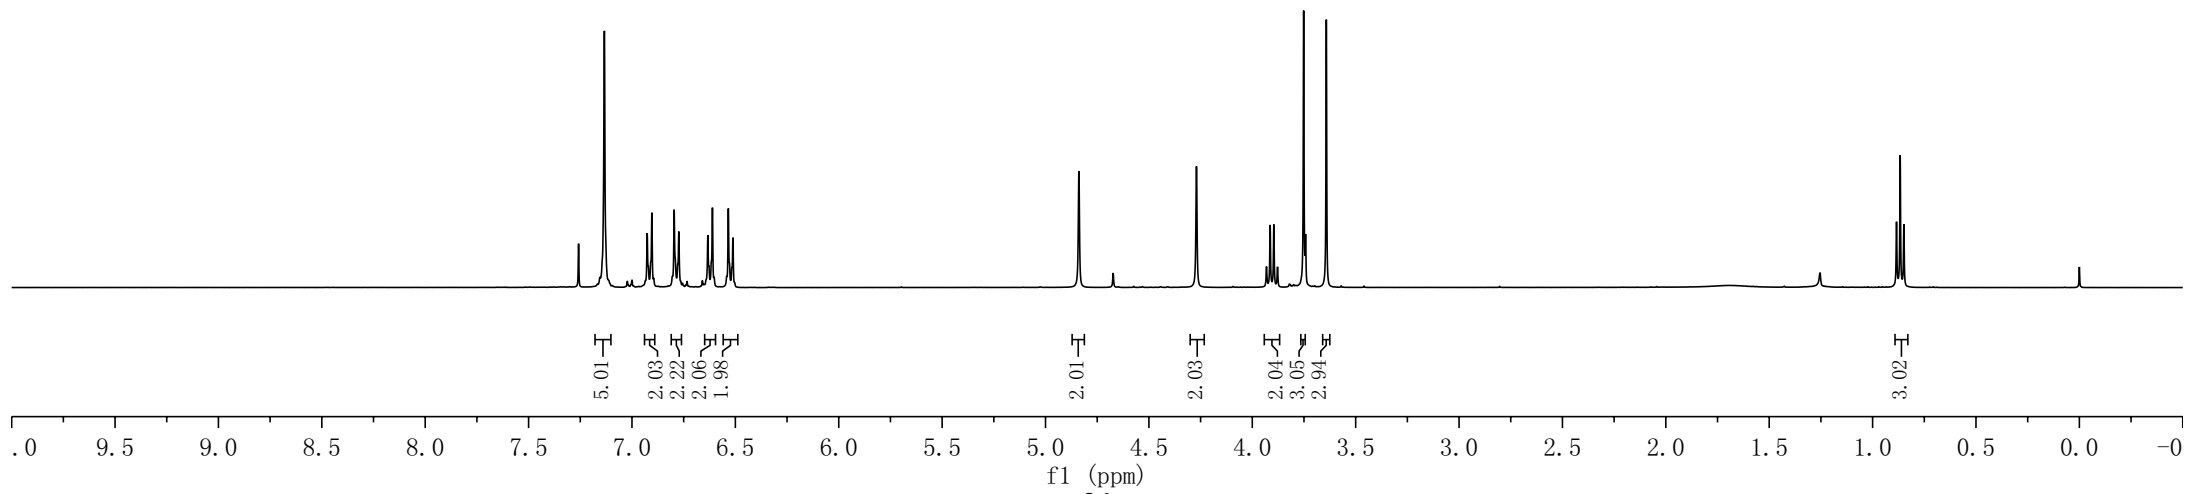

34

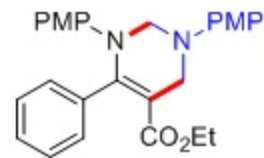

3i

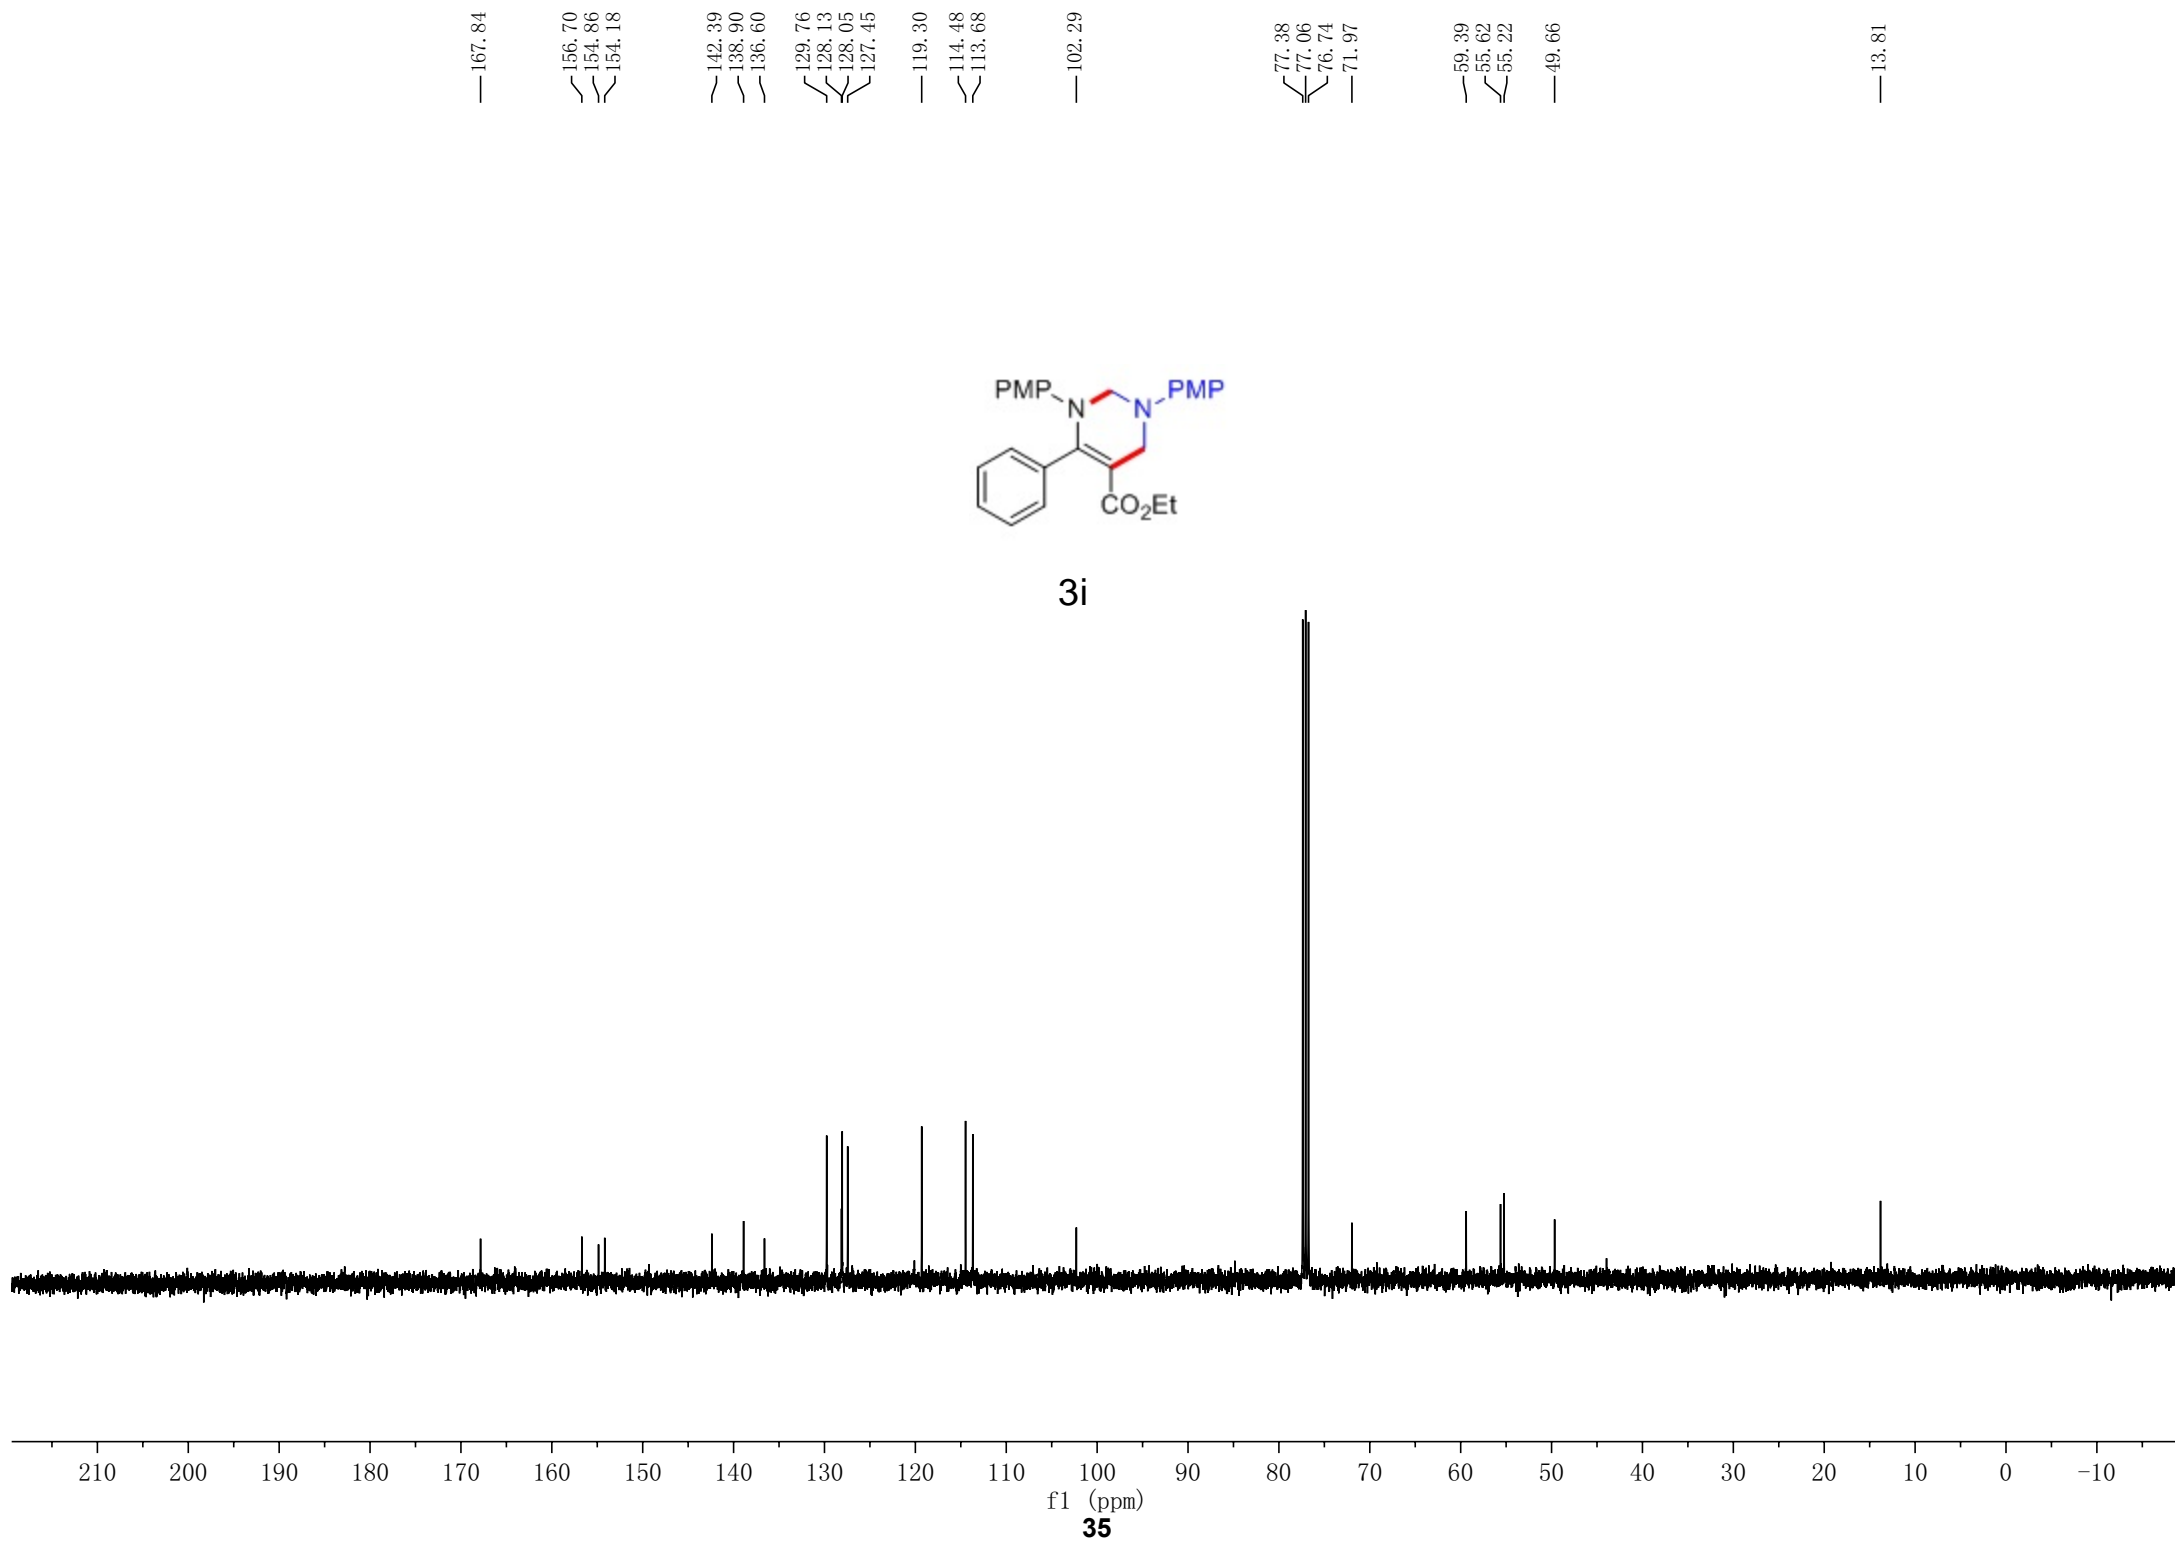

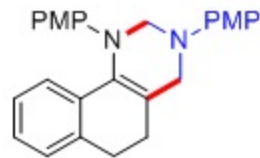

3j

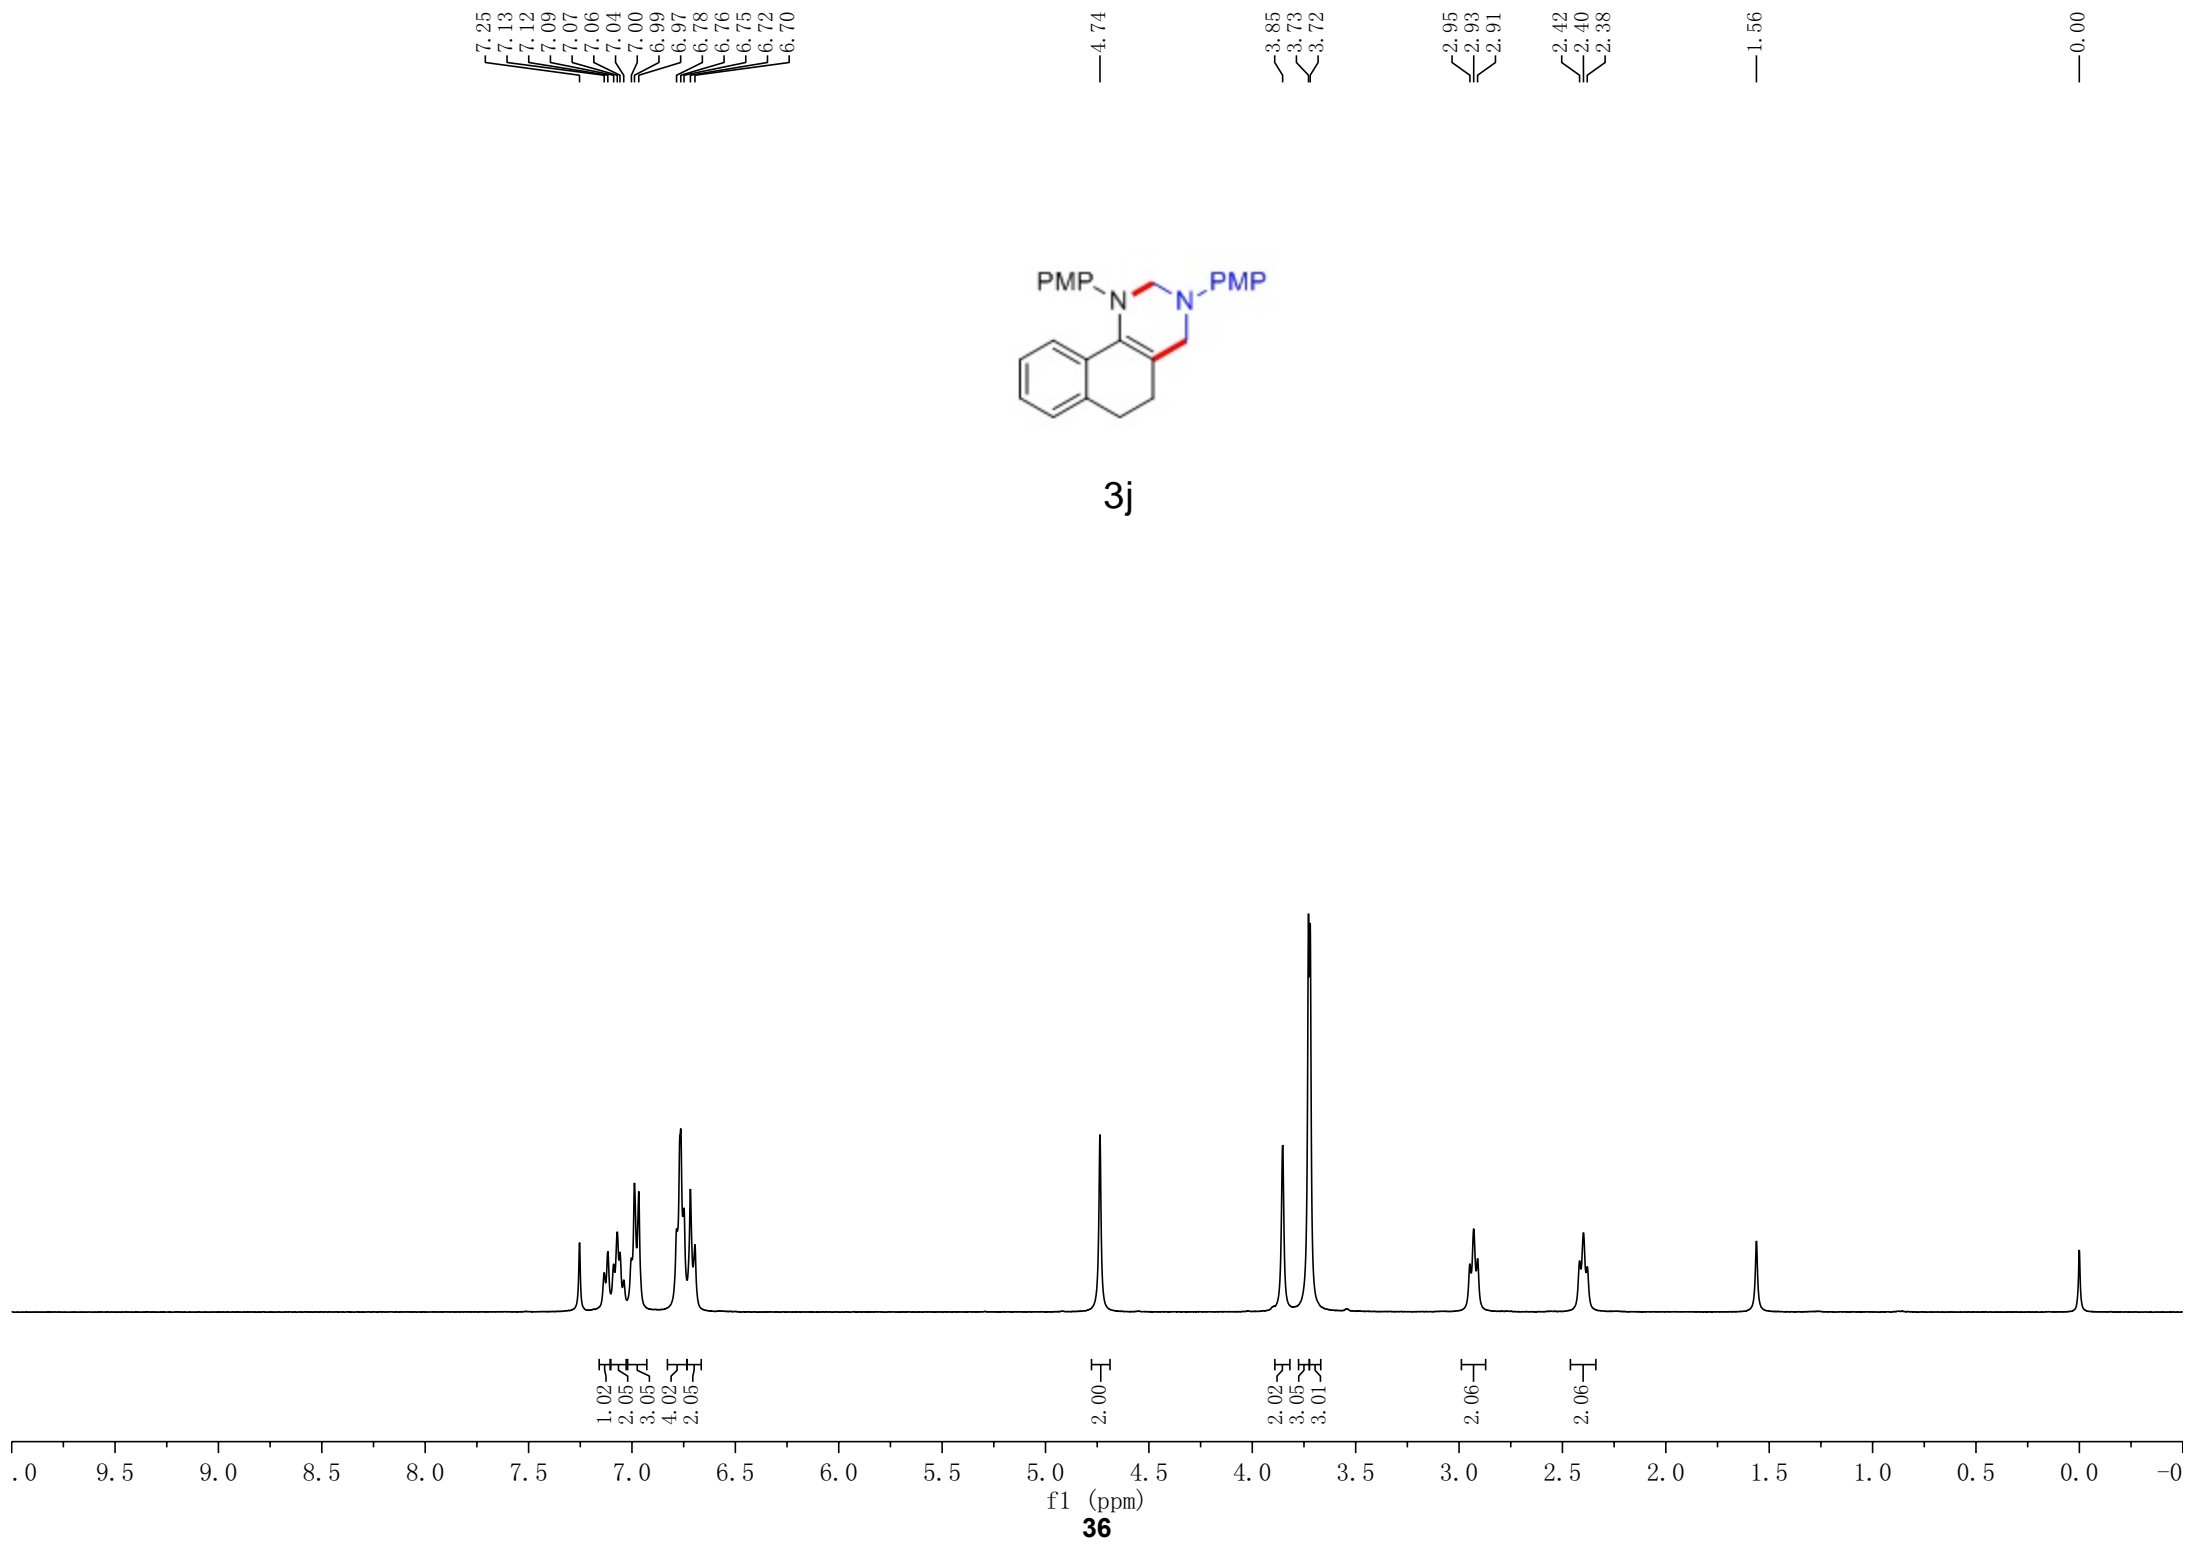

155.15  
153.29  
148.26  
142.61  
142.02  
136.02  
134.85  
131.78  
127.32  
126.57  
126.27  
123.59  
121.74  
116.96  
114.58  
114.28

77.40  
77.08  
76.76  
72.24

55.69  
55.43  
52.12

28.22  
26.20

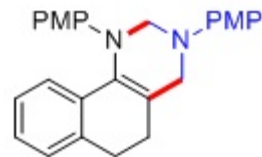

3j

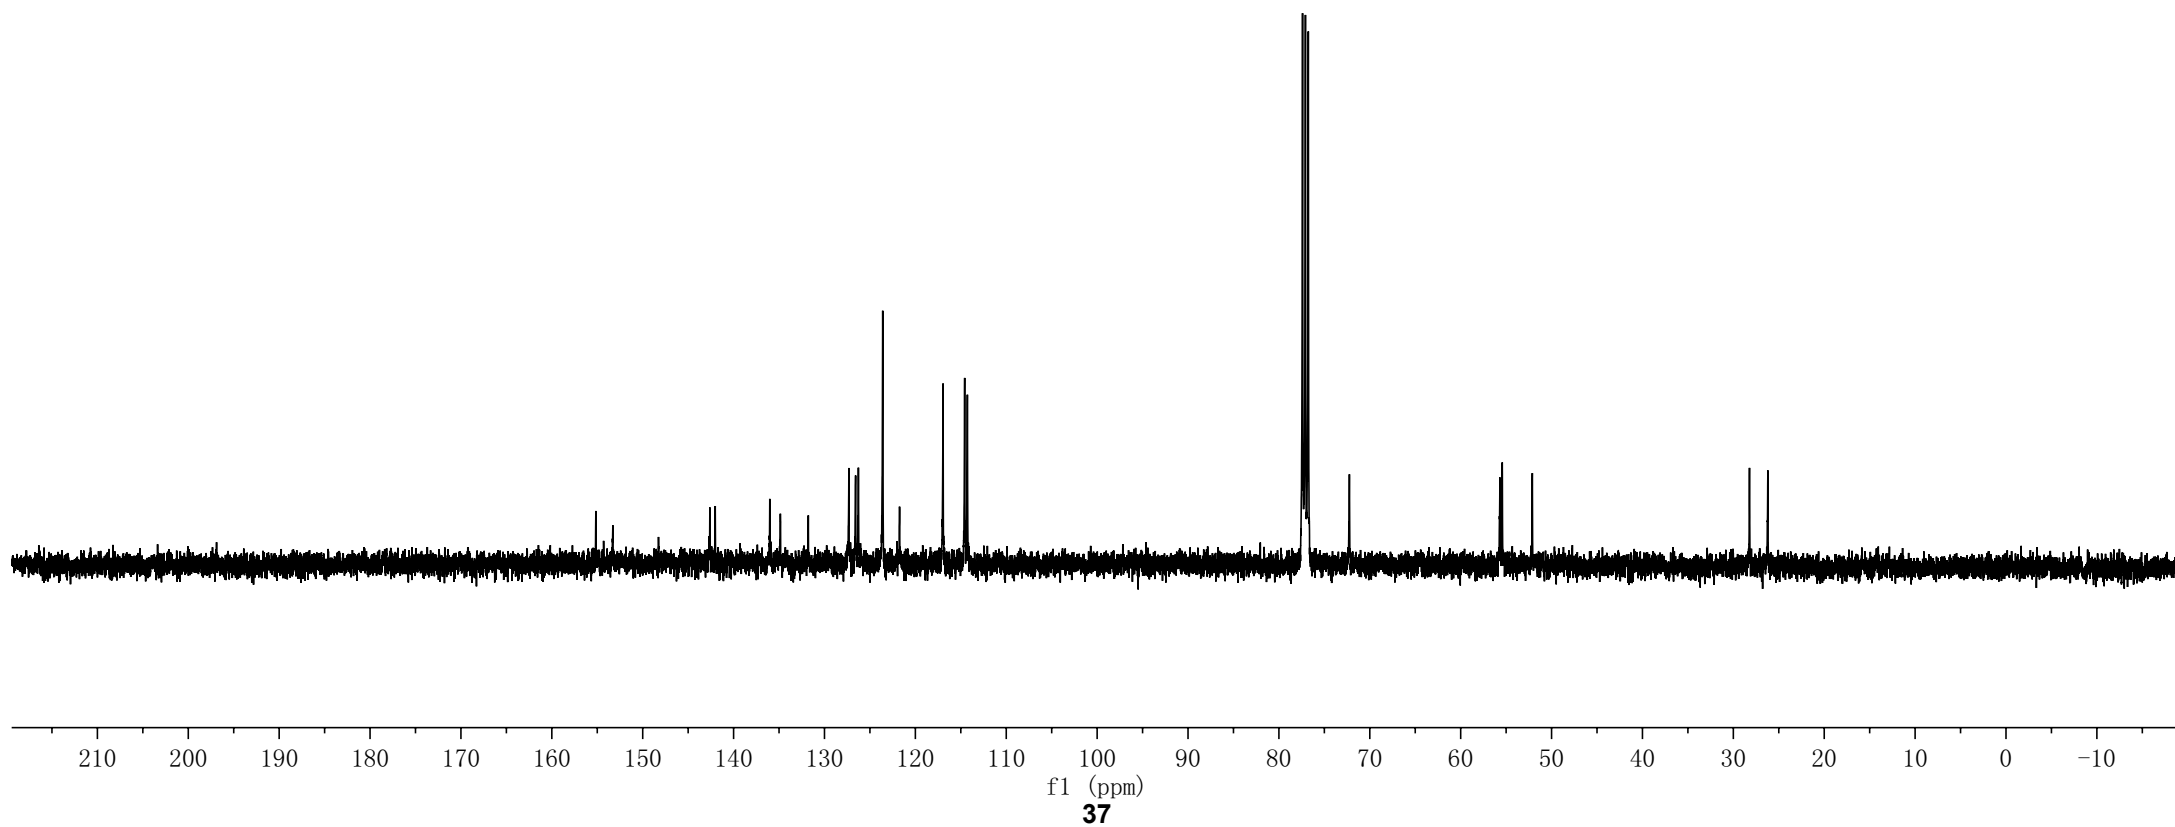

7.26  
7.19  
7.19  
7.18  
7.16  
7.16  
7.15  
7.14  
7.14  
7.01  
7.00  
6.99  
6.91  
6.89  
6.87  
6.85  
6.78

4.87  
4.14  
3.74

2.17  
1.56  
1.26

0.01

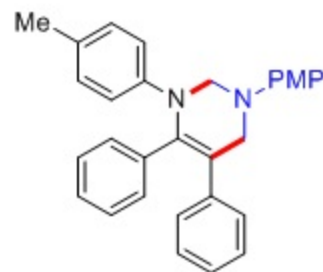

3k

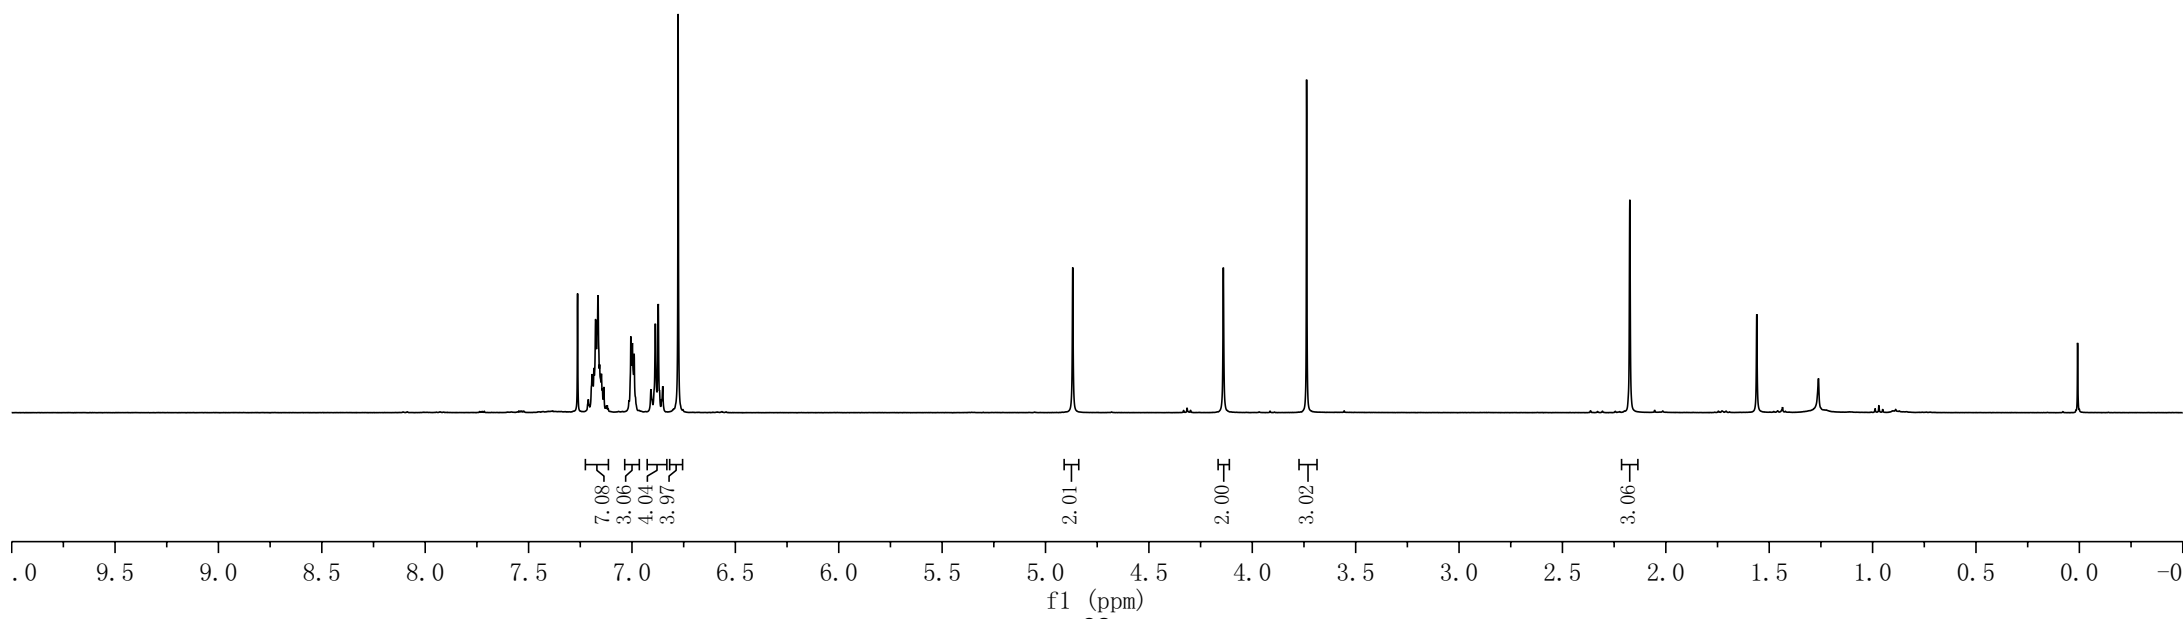

38

153.55  
145.17  
142.48  
140.43  
140.15  
136.82  
132.13  
130.83  
129.81  
129.17  
127.97  
127.48  
127.04  
126.09  
124.24  
120.57  
117.64  
114.53

77.29  
77.03  
76.78  
72.15

55.65  
53.21

20.73

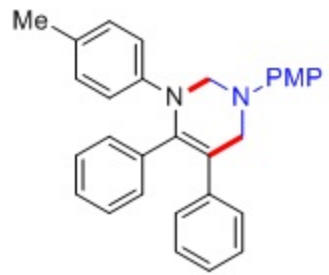

3k

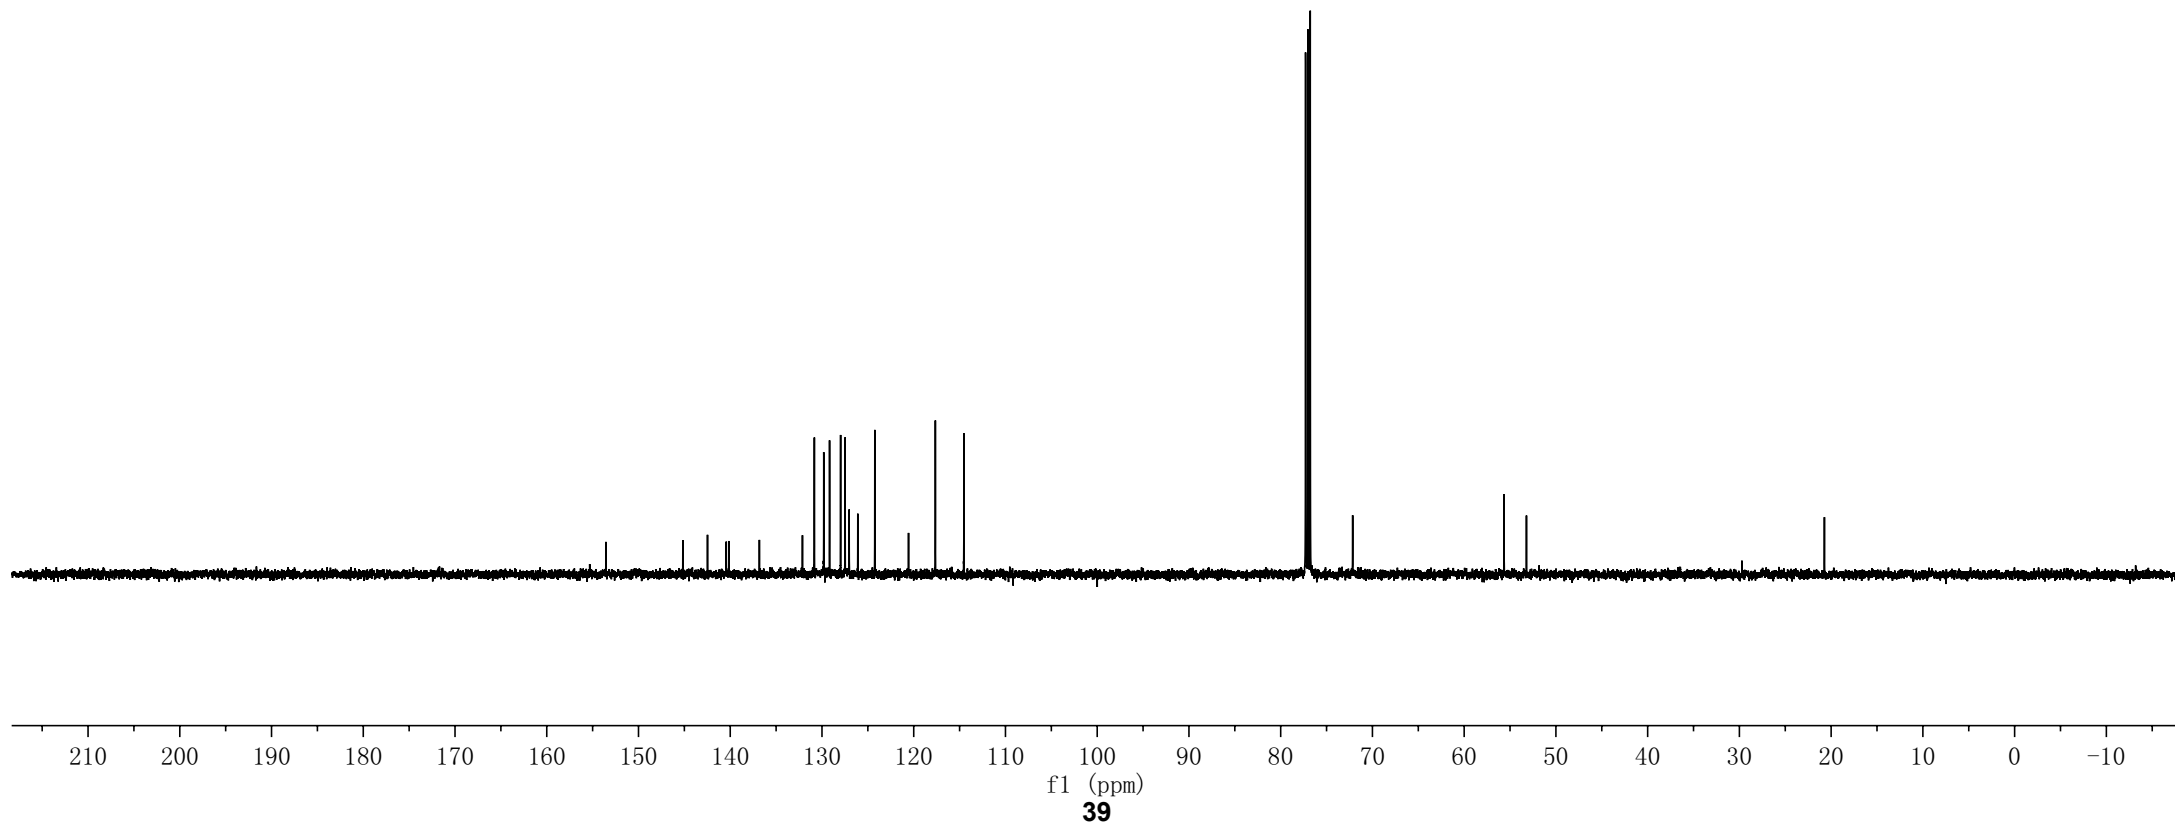

7.26  
7.21  
7.21  
7.19  
7.18  
7.18  
7.17  
7.16  
7.15  
7.14  
7.14  
7.01  
7.00  
6.95  
6.93  
6.89  
6.87  
6.77

4.88

4.14

3.73

2.79  
2.77  
2.75  
2.74  
2.72  
2.70  
2.68

1.55

1.14  
1.12

0.01

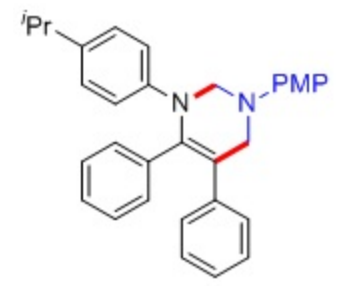

31

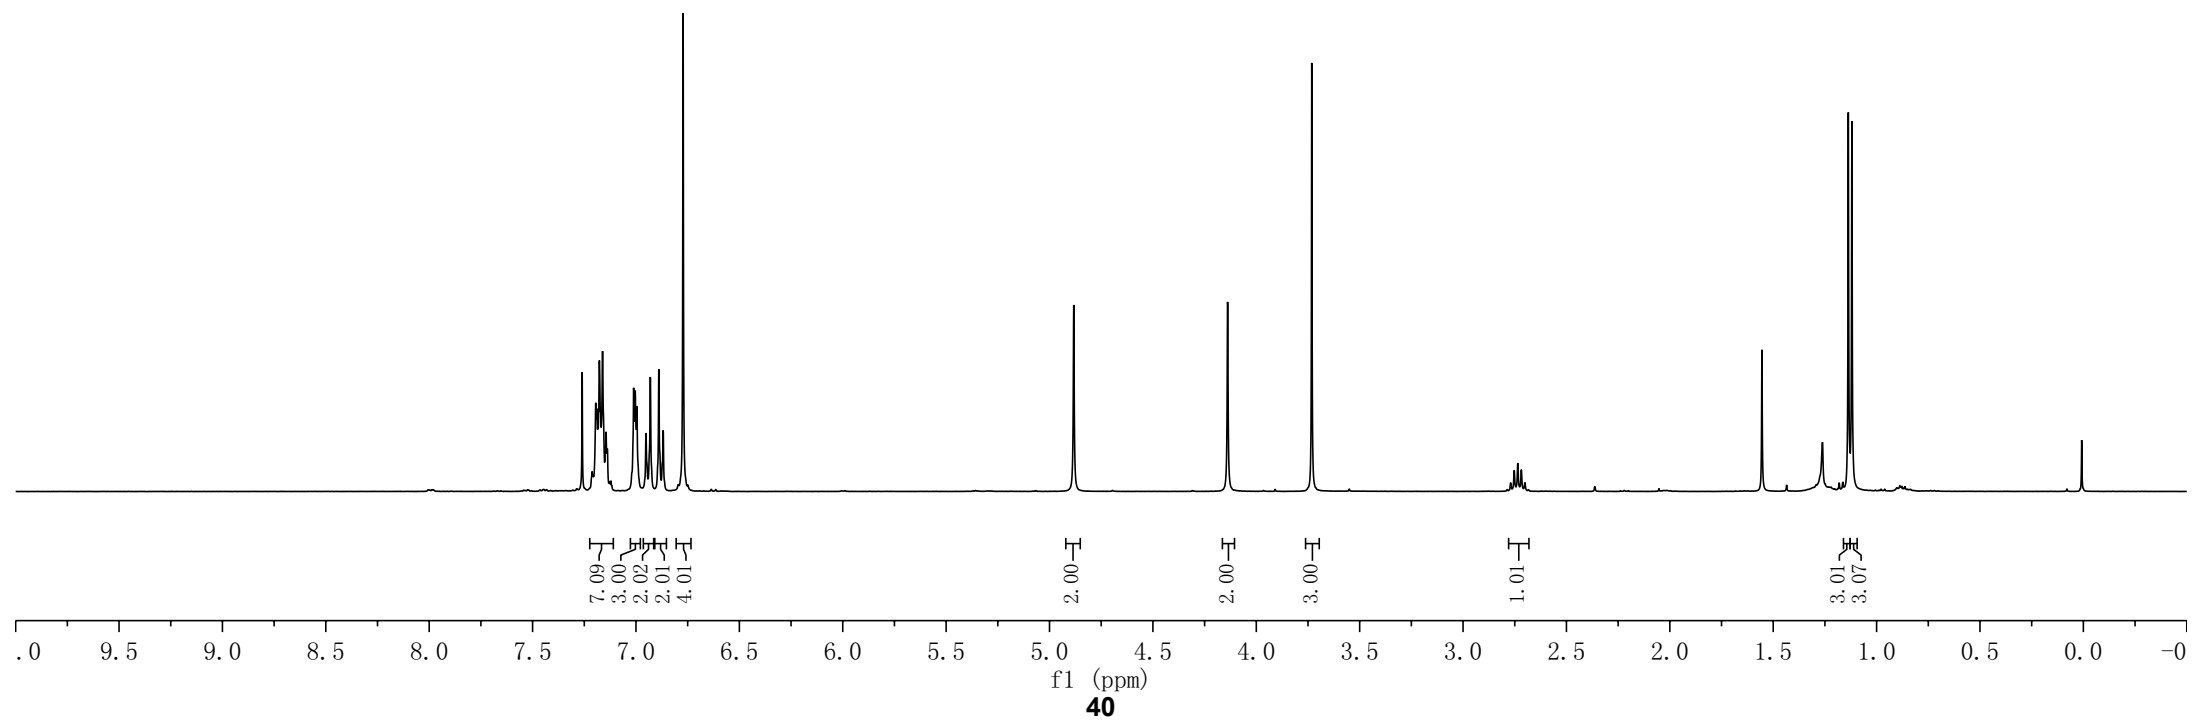



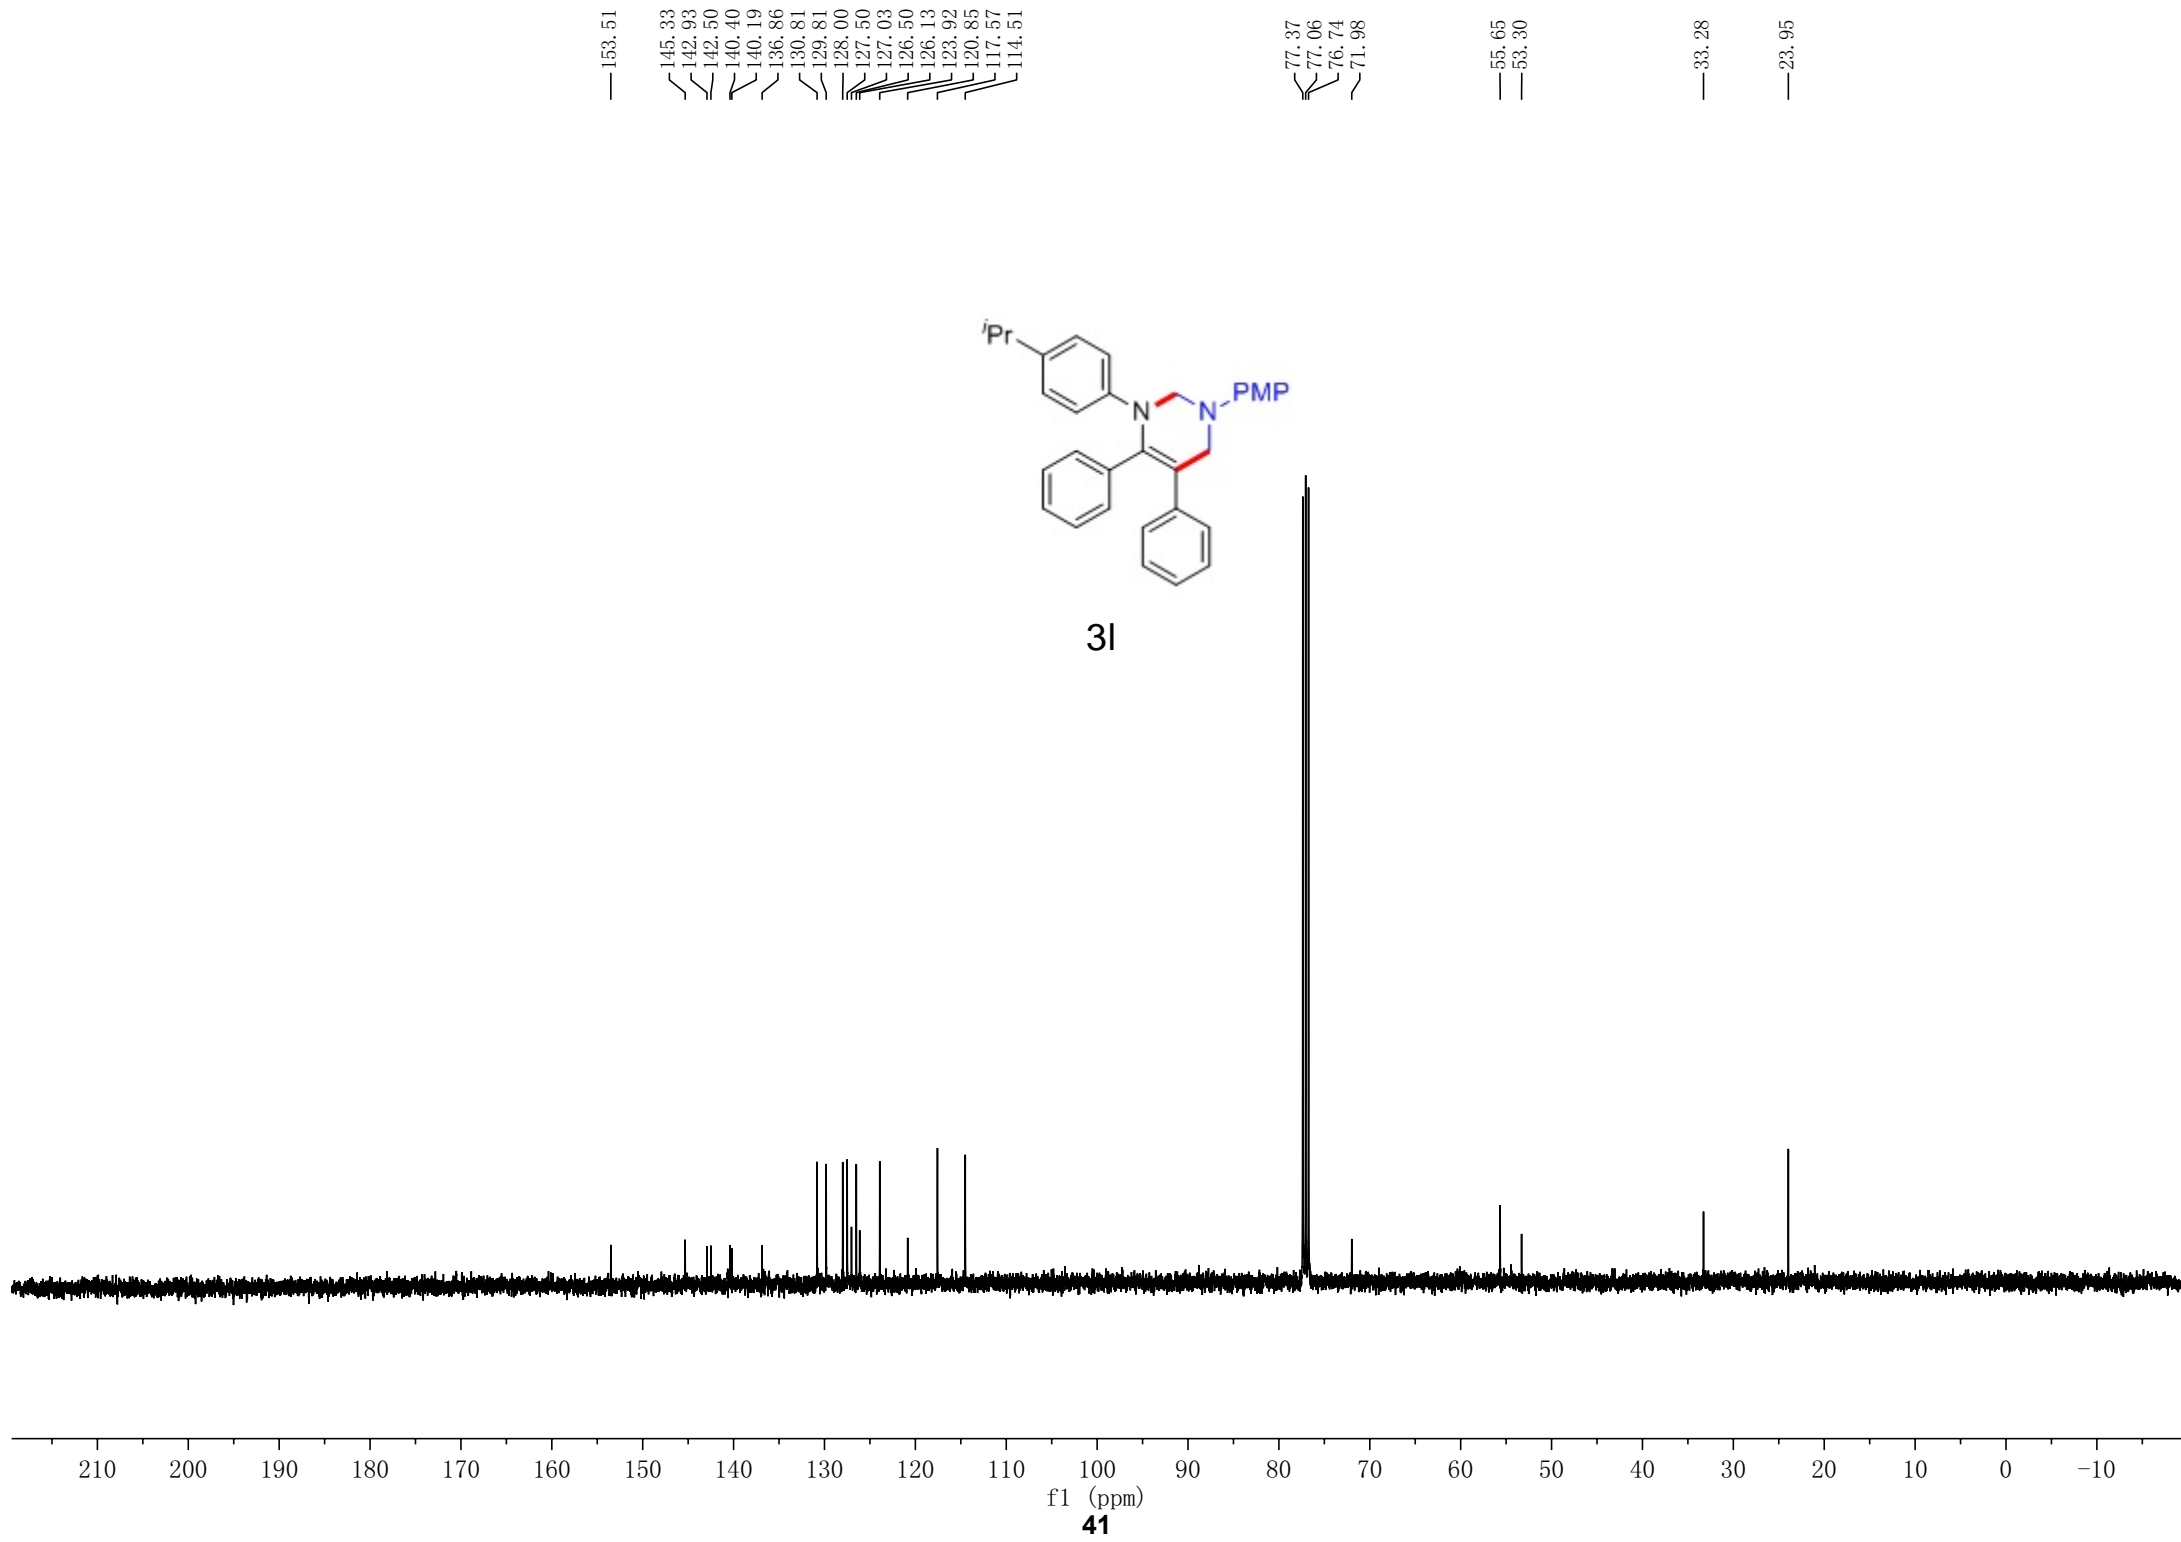

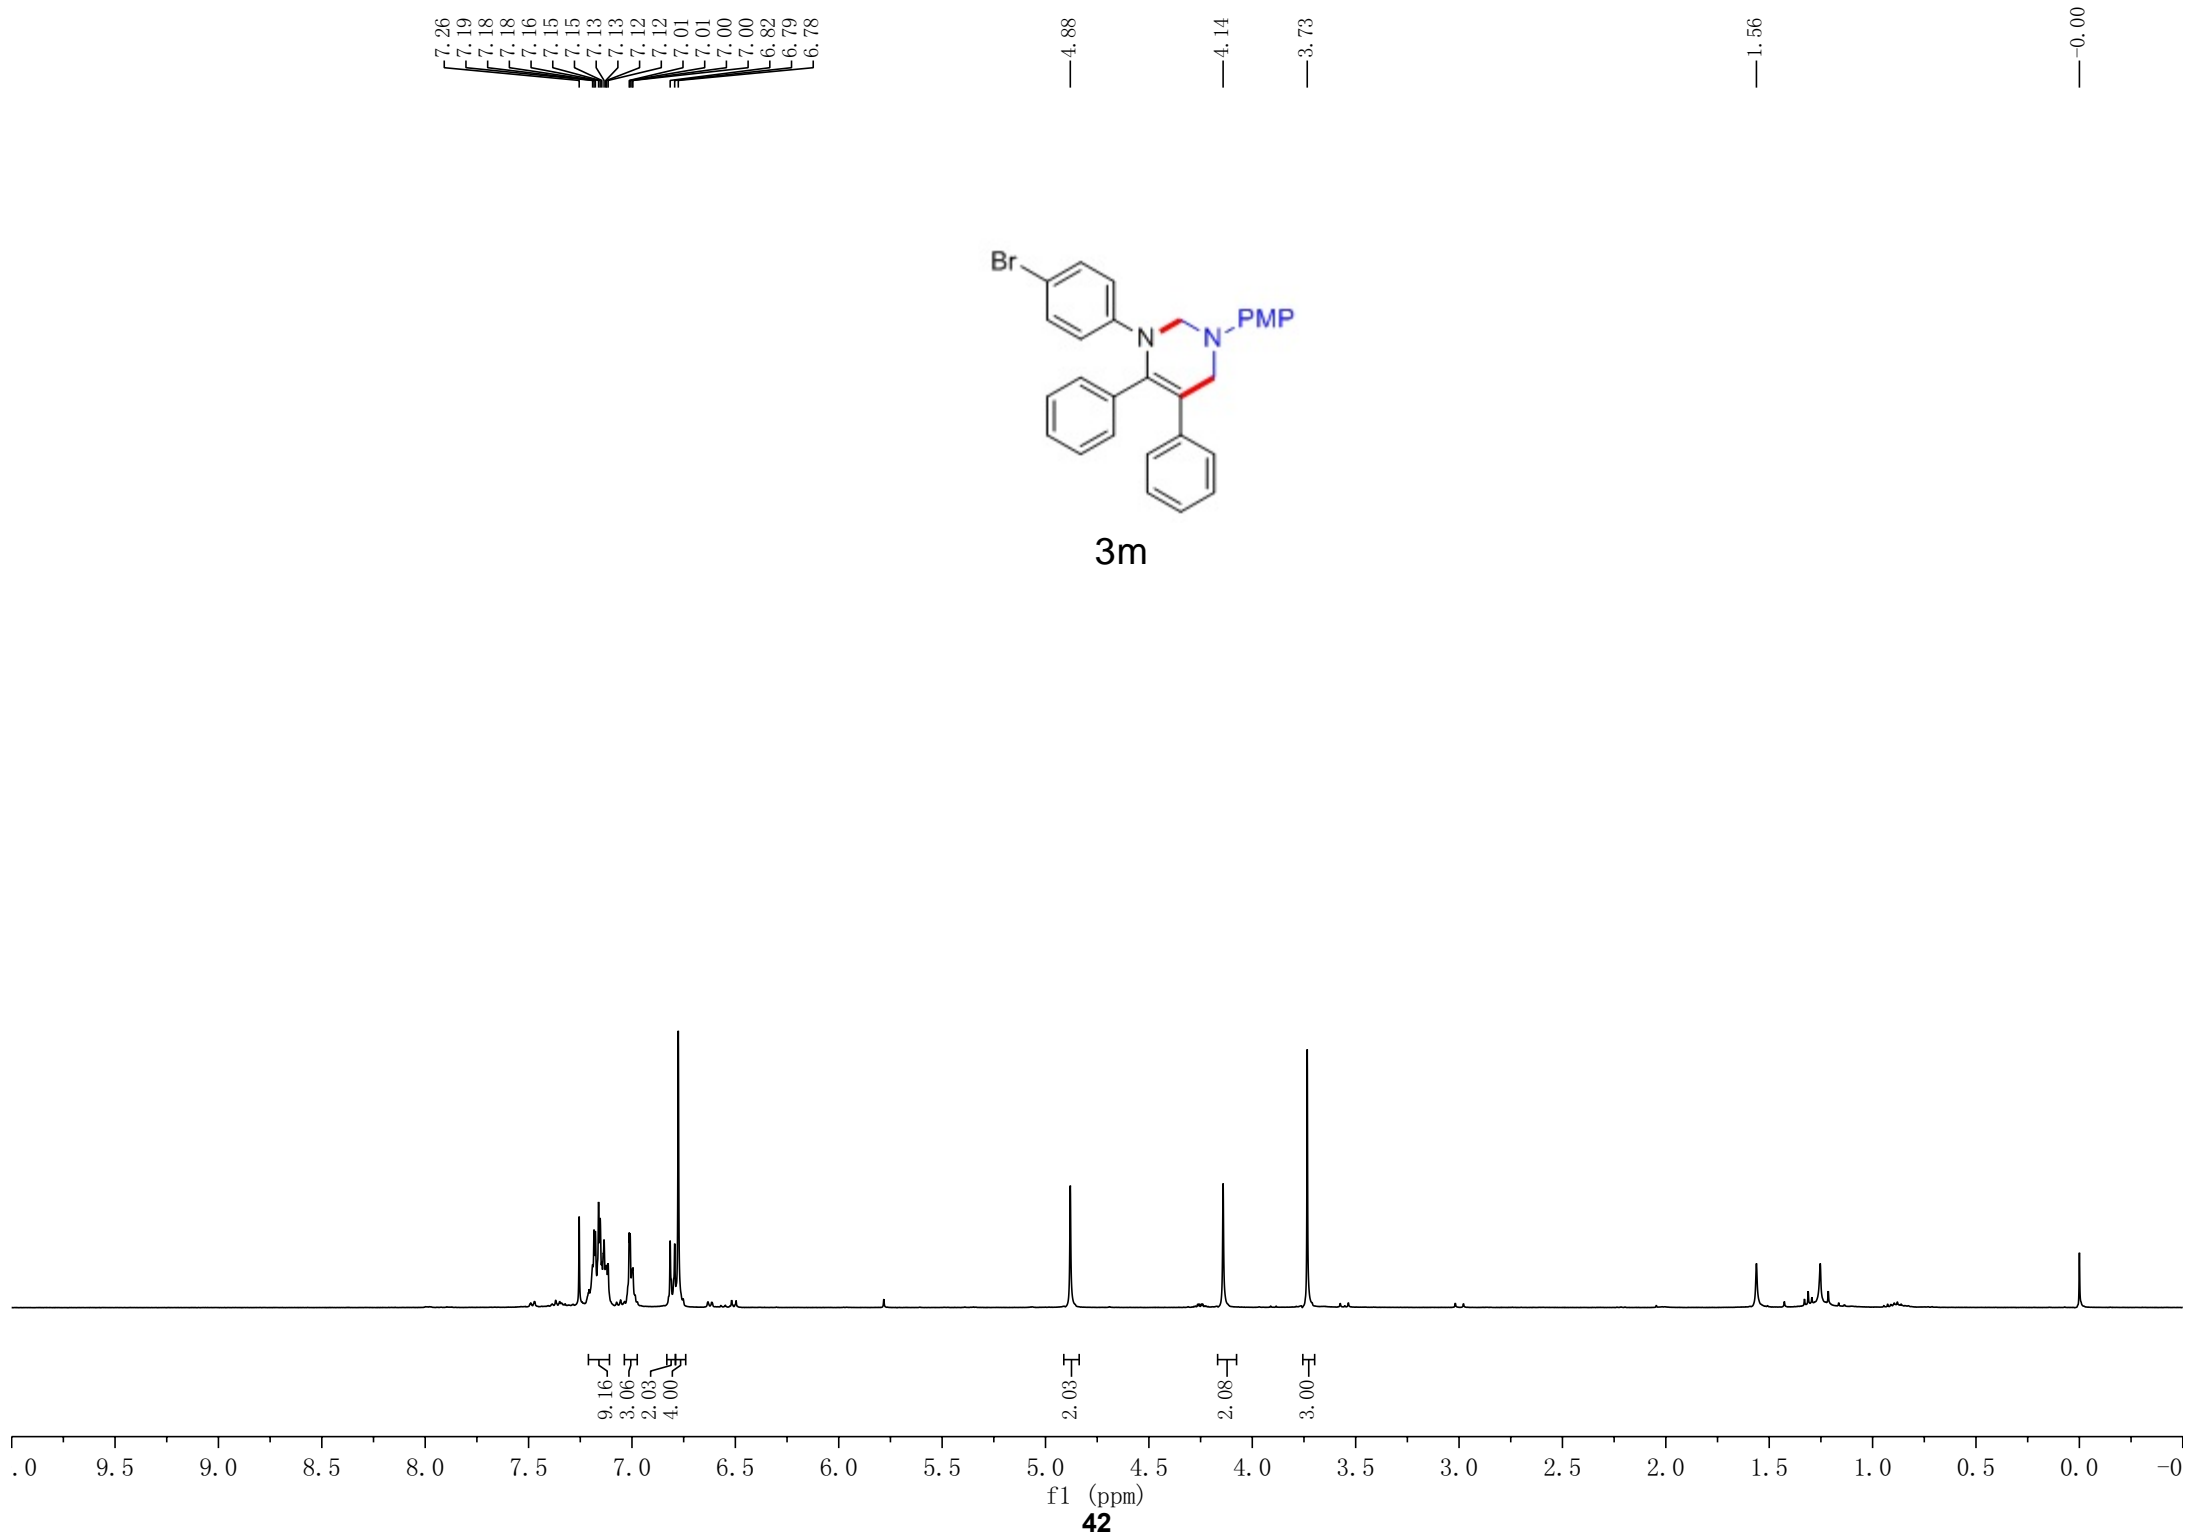

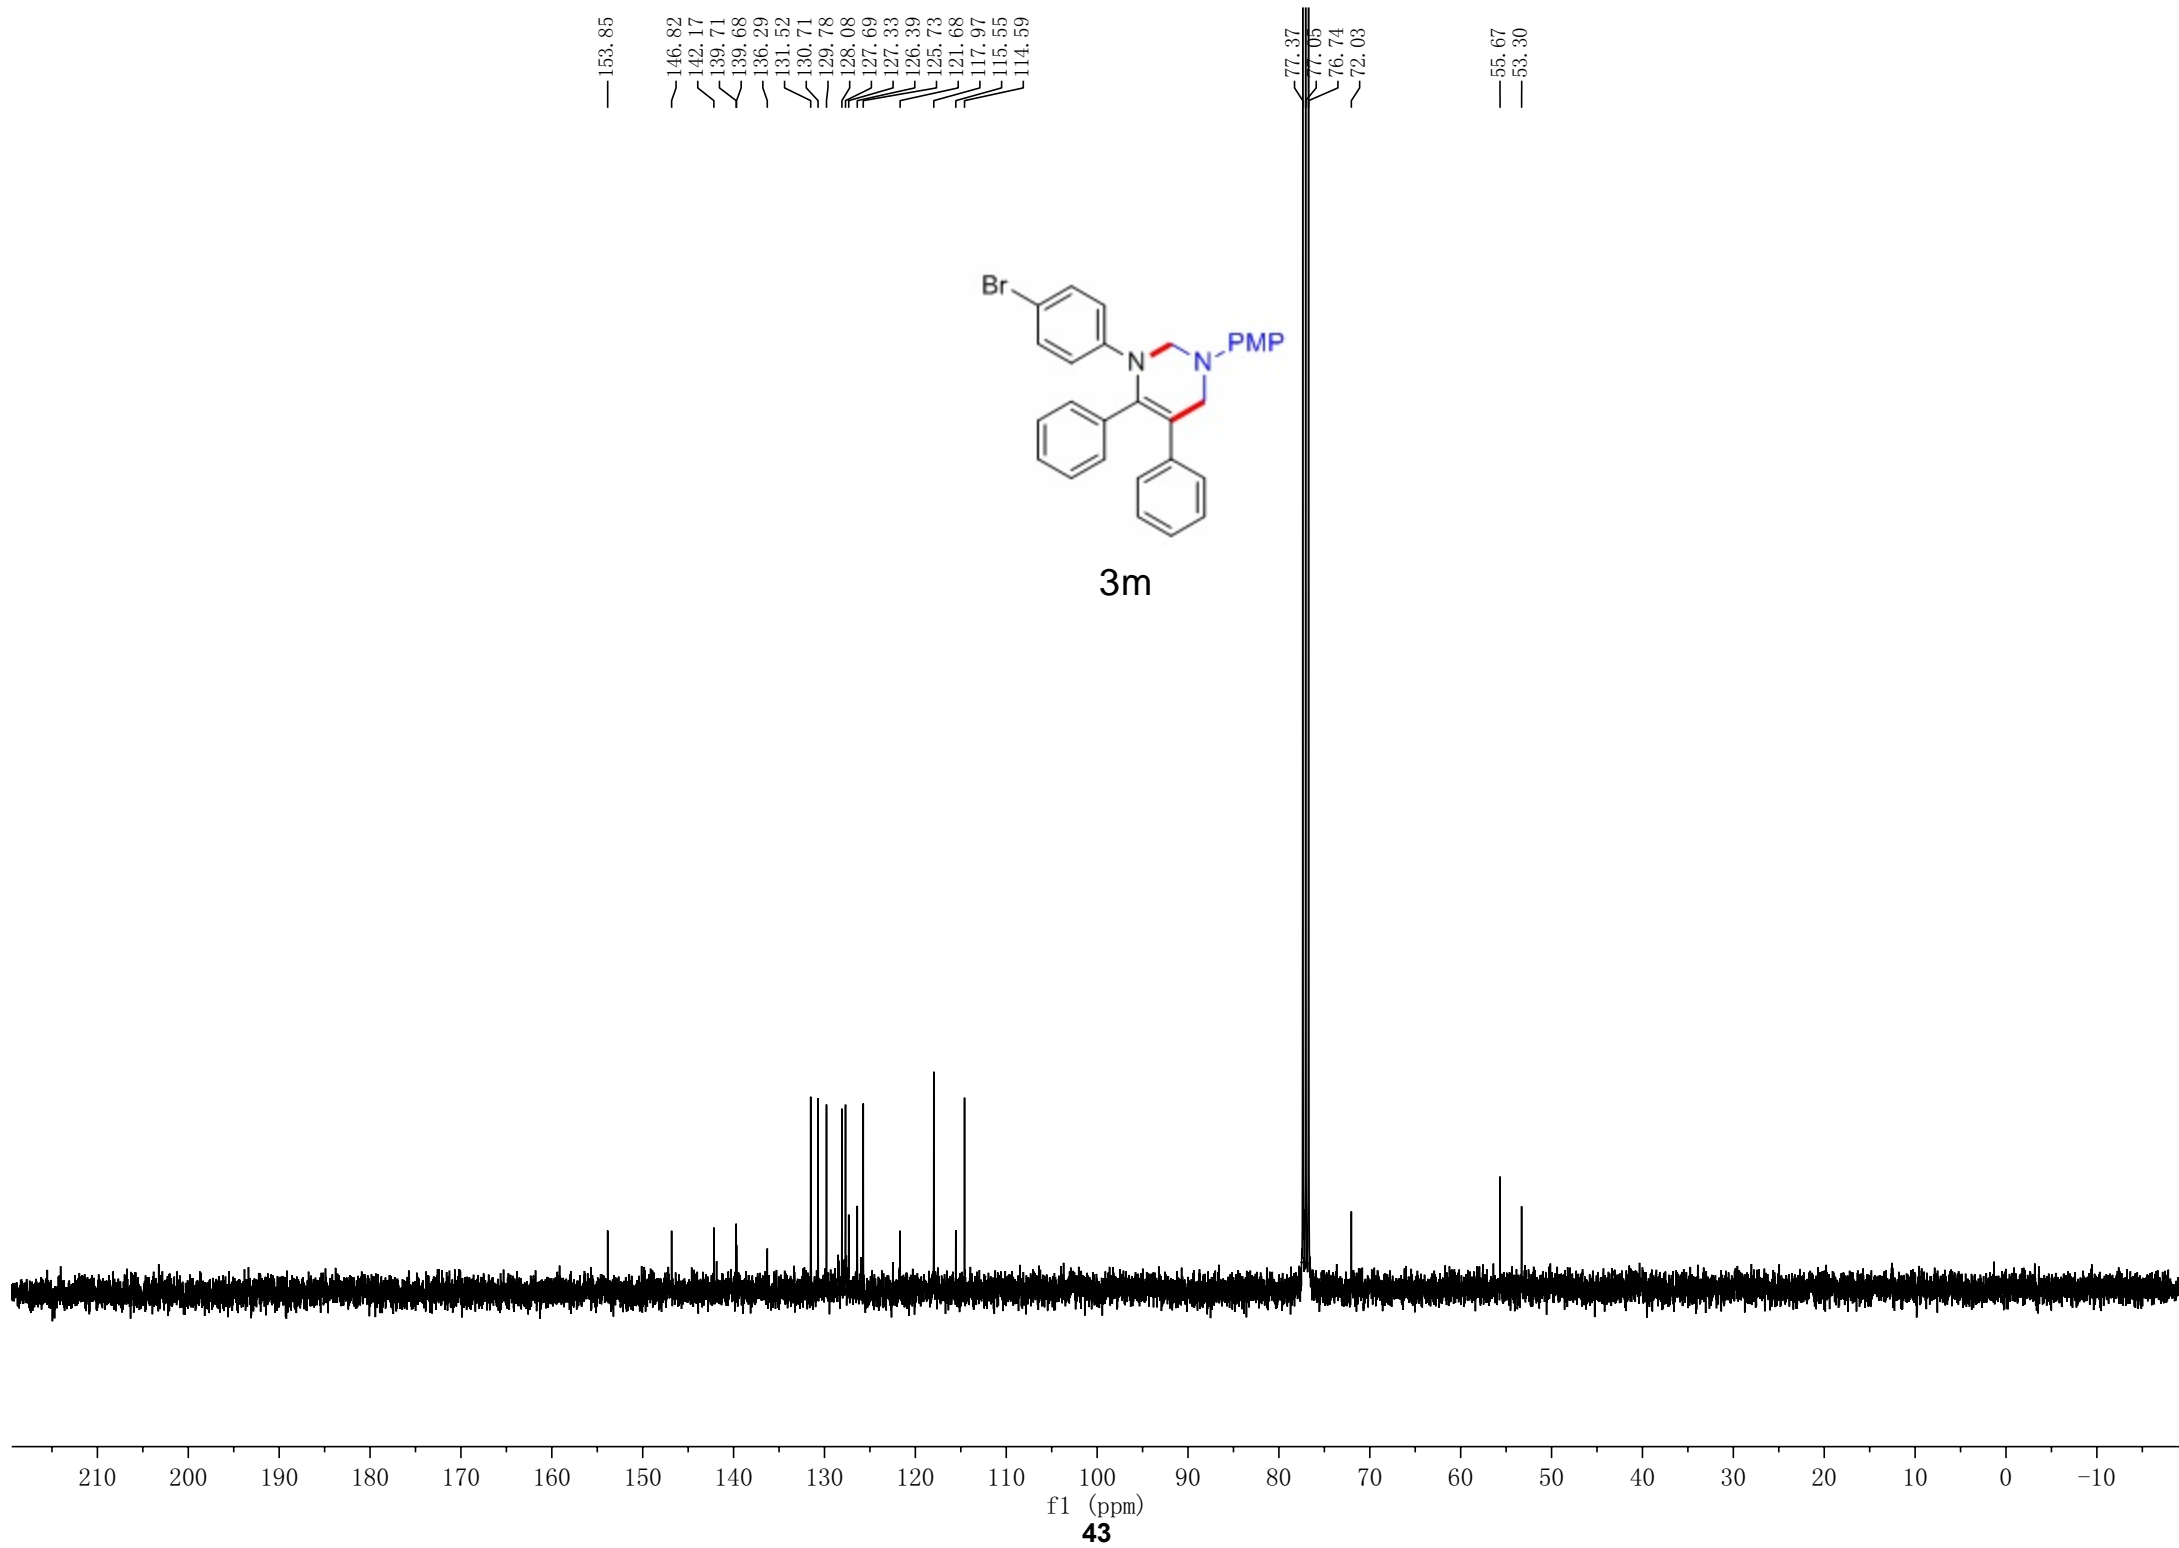

7.25  
7.20  
7.18  
7.16  
7.15  
7.14  
7.13  
7.13  
7.02  
7.01  
7.00  
6.99  
6.97  
6.95  
6.92  
6.92  
6.82  
6.80  
6.78  
6.76  
6.76

4.90

4.15

3.73

1.56

0.00

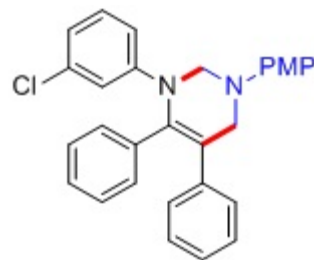

3n

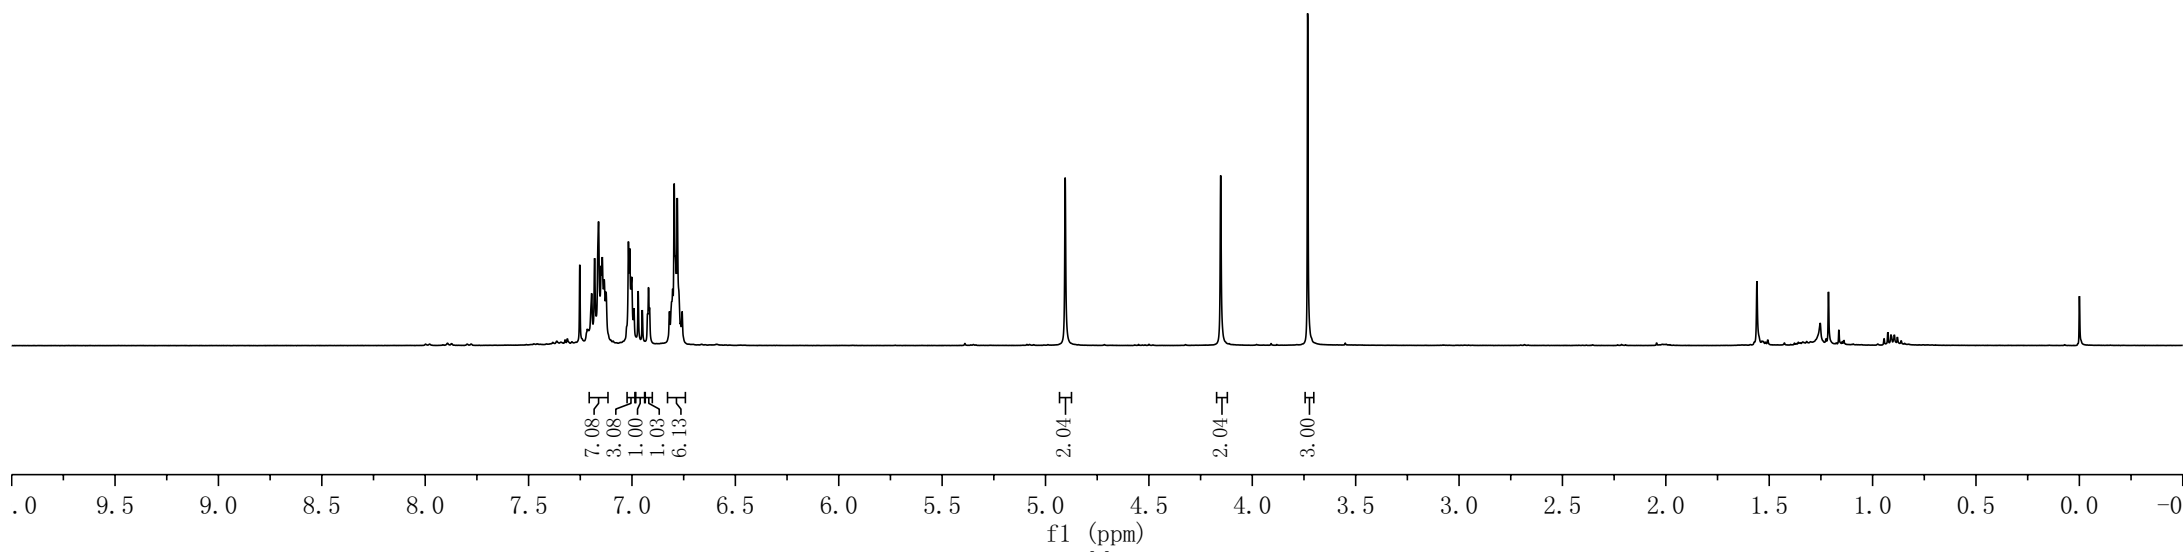

44

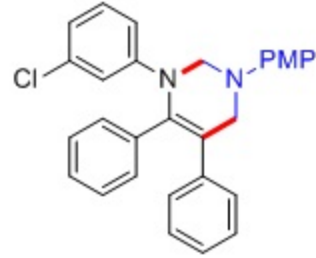

3n

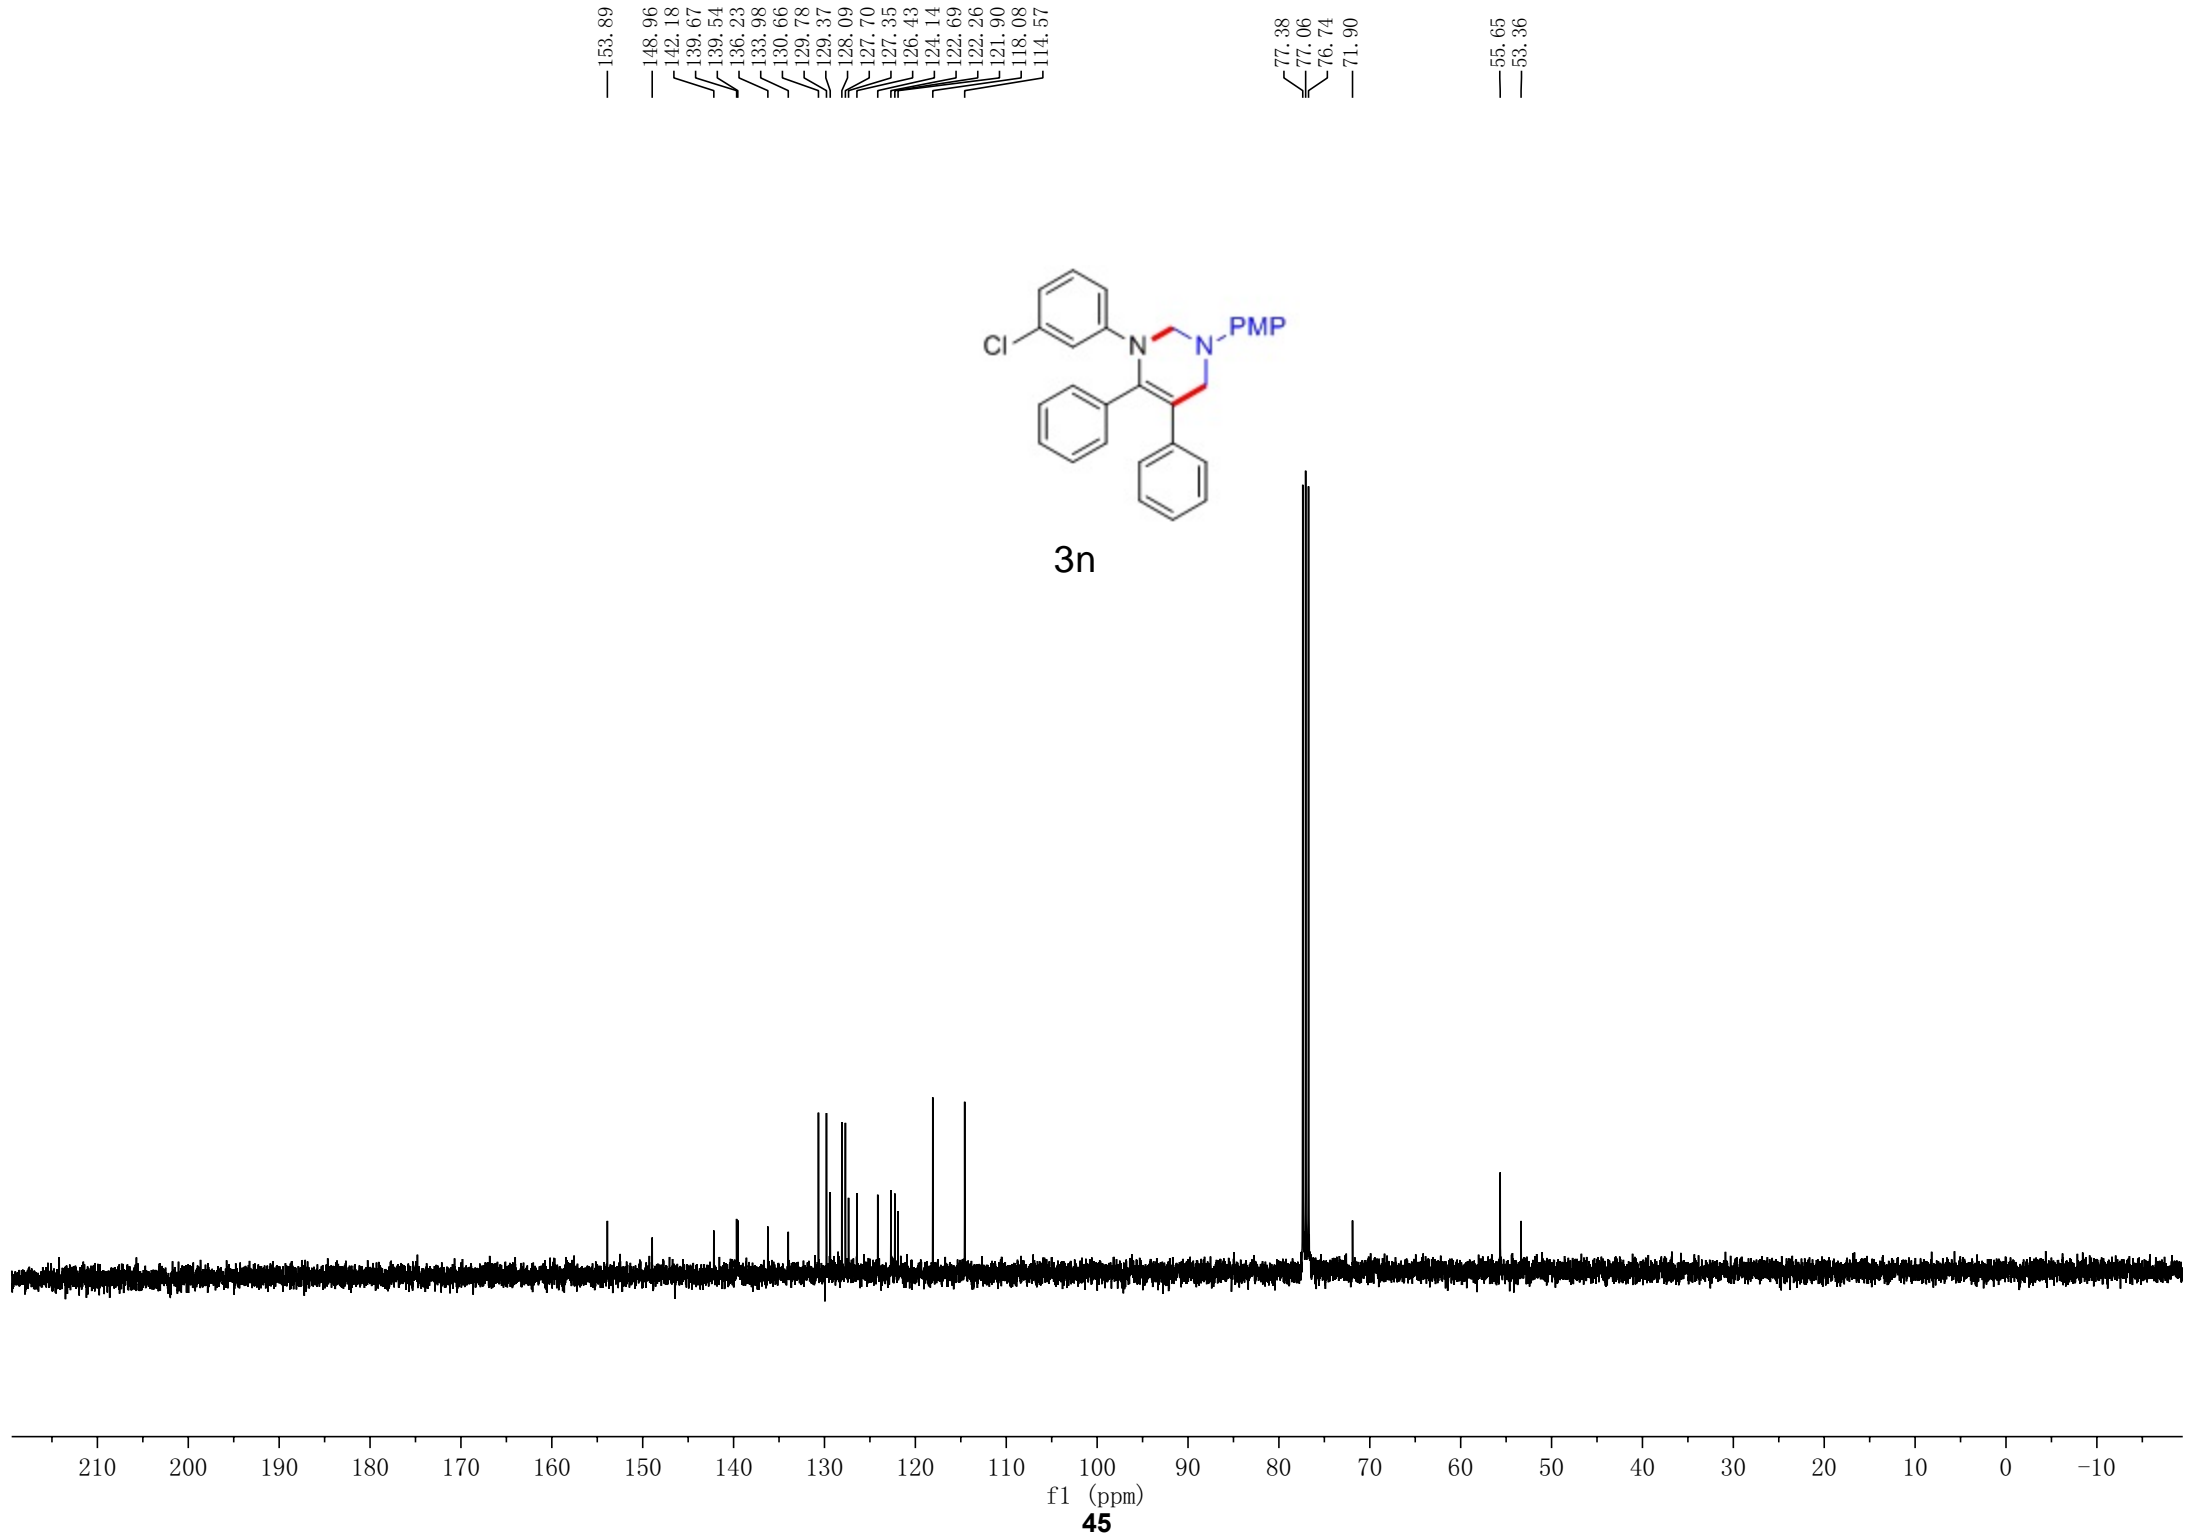

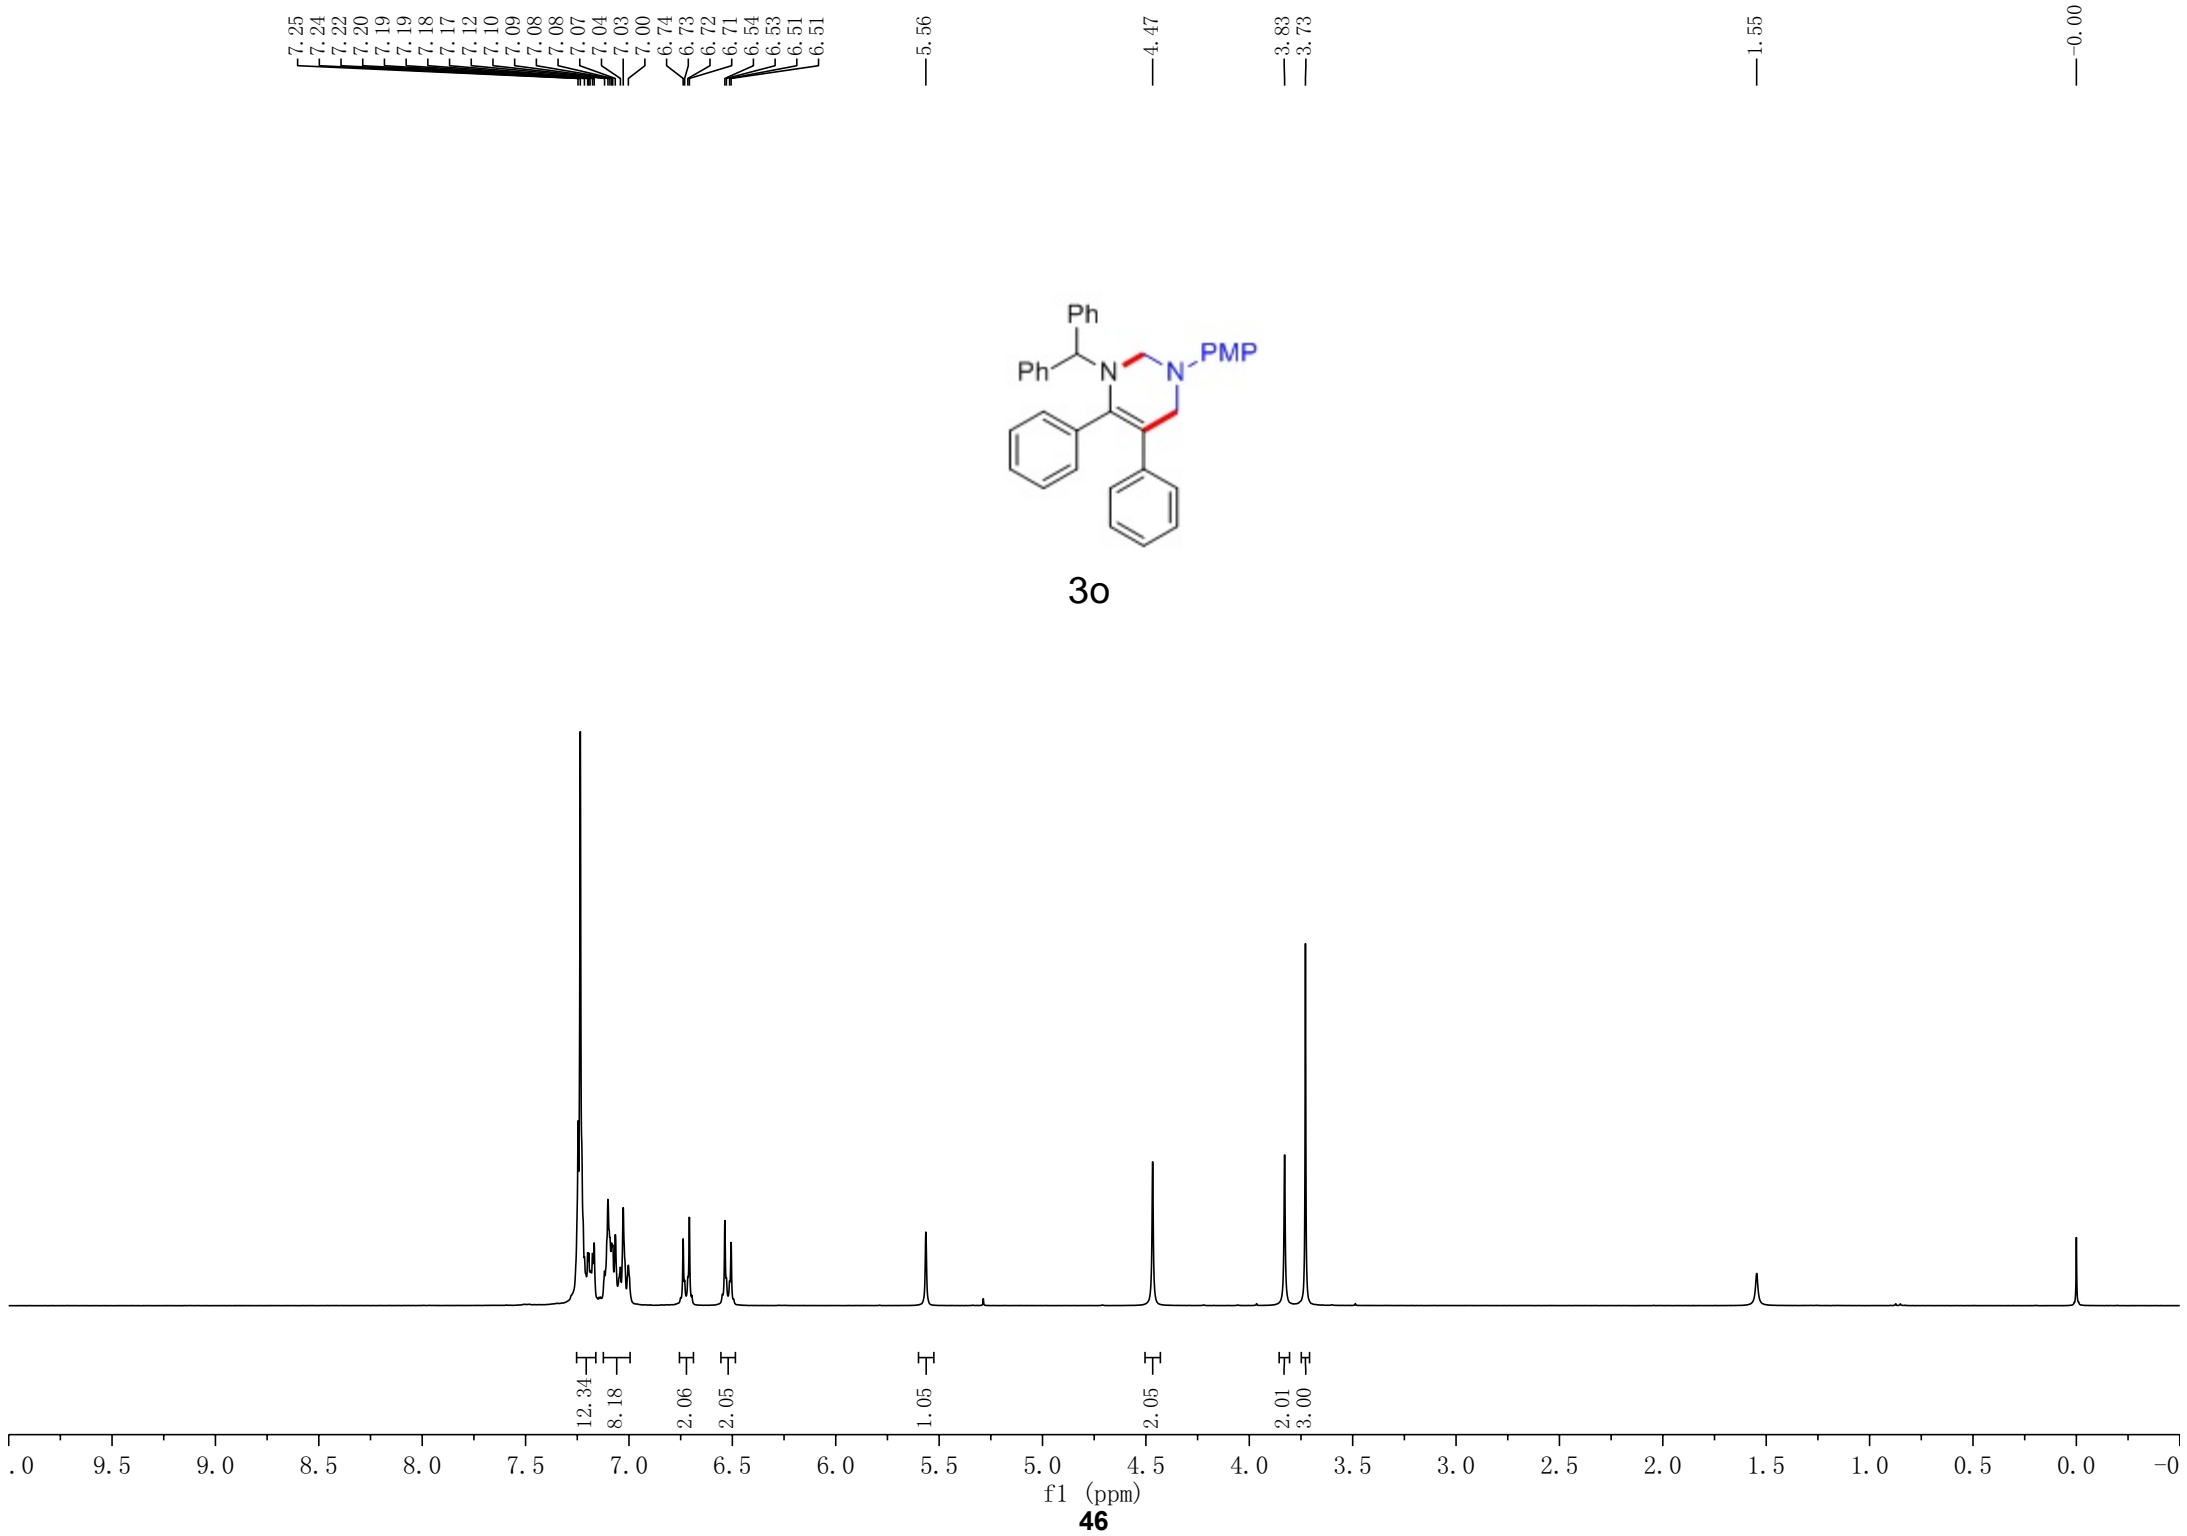

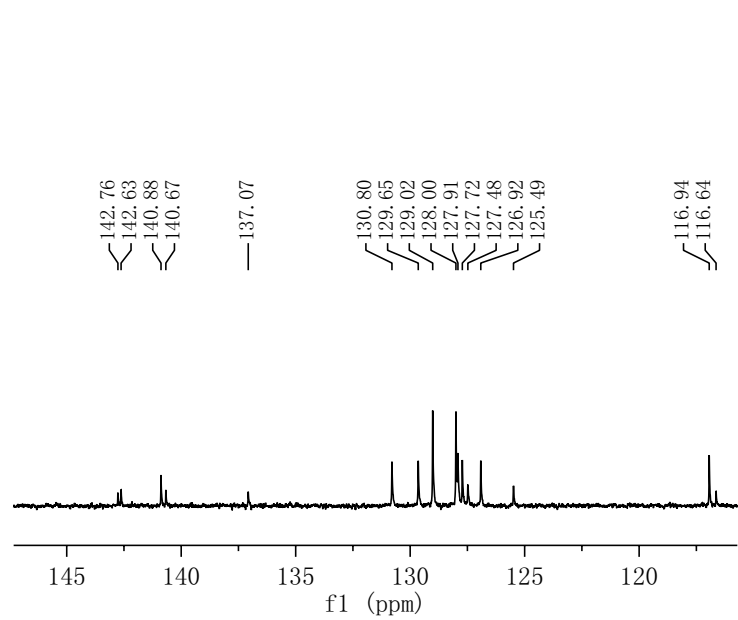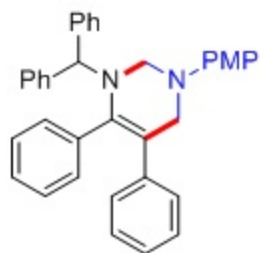

30

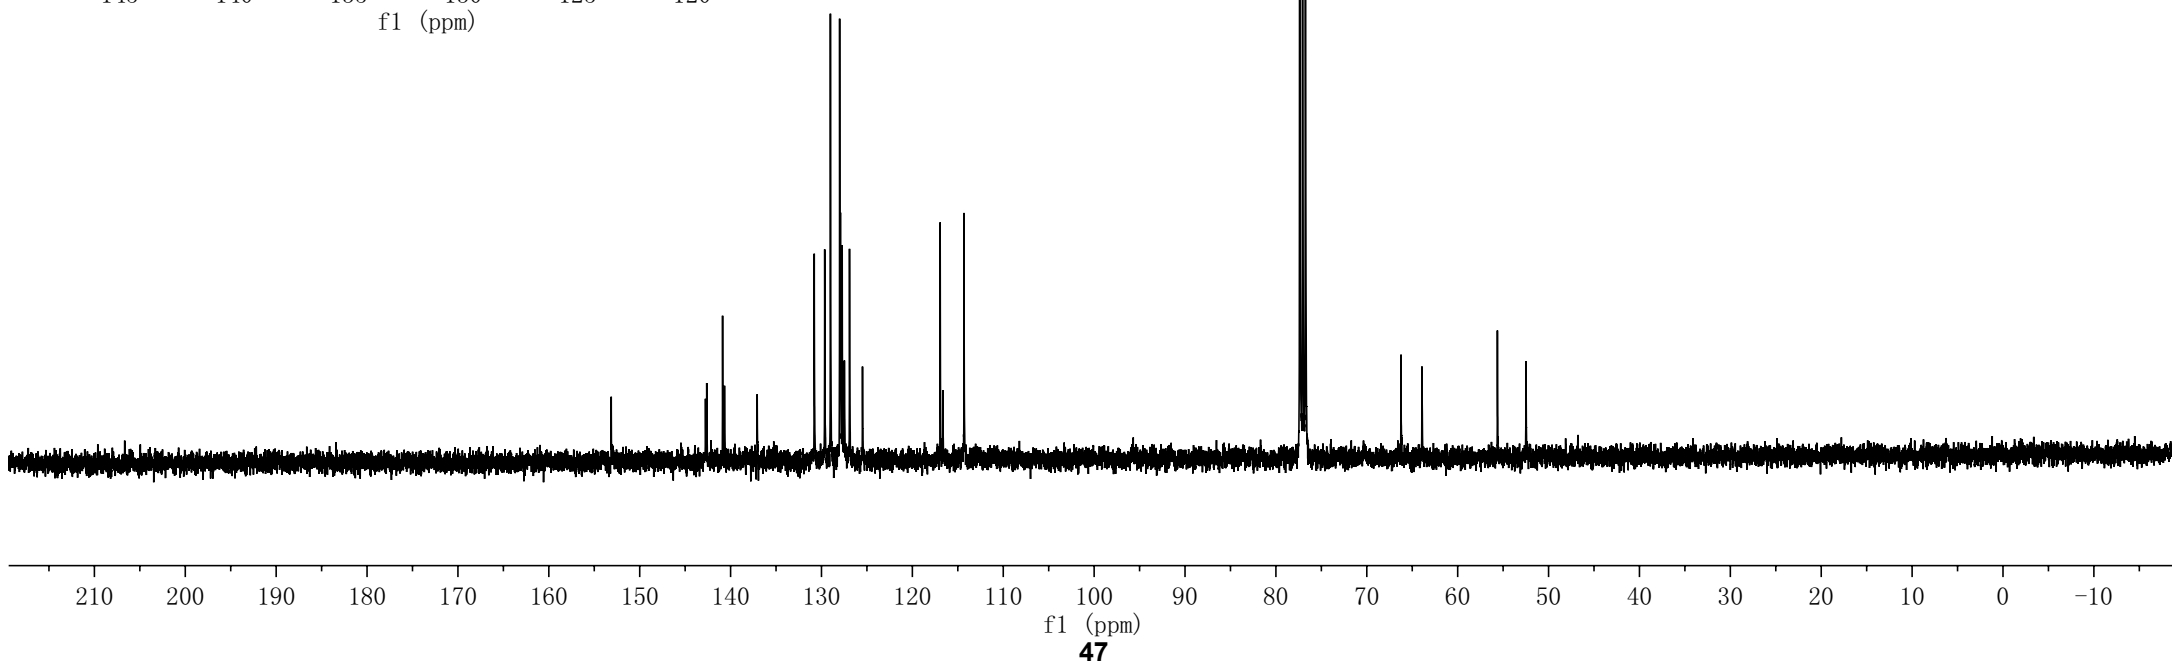

47

7.25  
7.22  
7.20  
7.20  
7.19  
7.18  
7.17  
7.15  
7.14  
7.01  
7.01  
7.00  
6.97  
6.97  
6.95  
6.95  
6.81  
6.79  
6.77  
6.67  
6.67  
6.65  
6.65

4.93

4.22

3.67

0.02

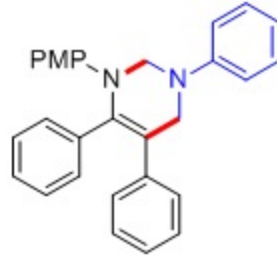

3p

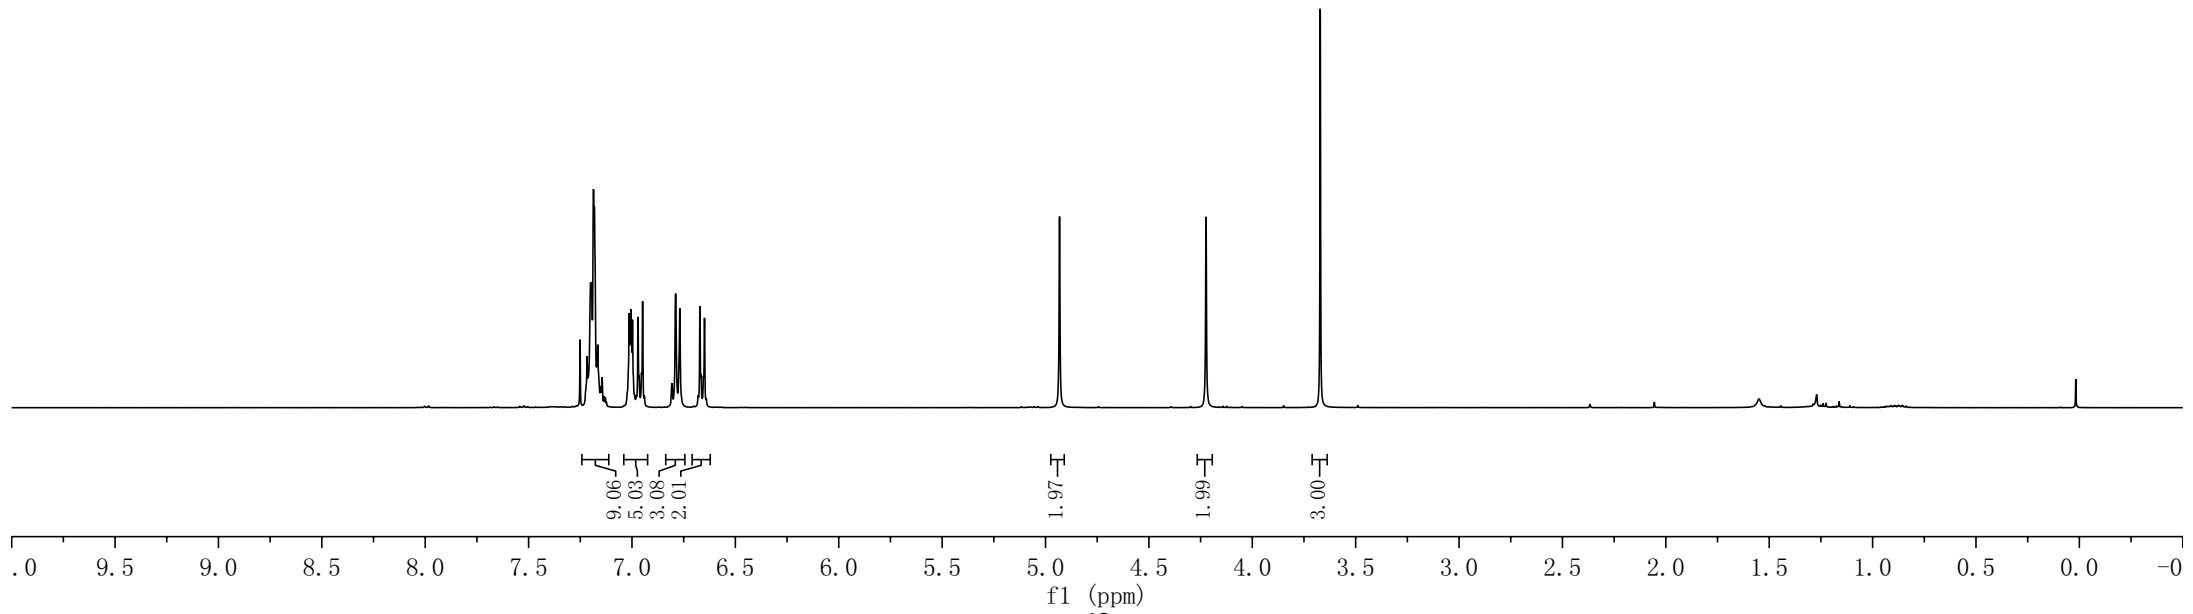



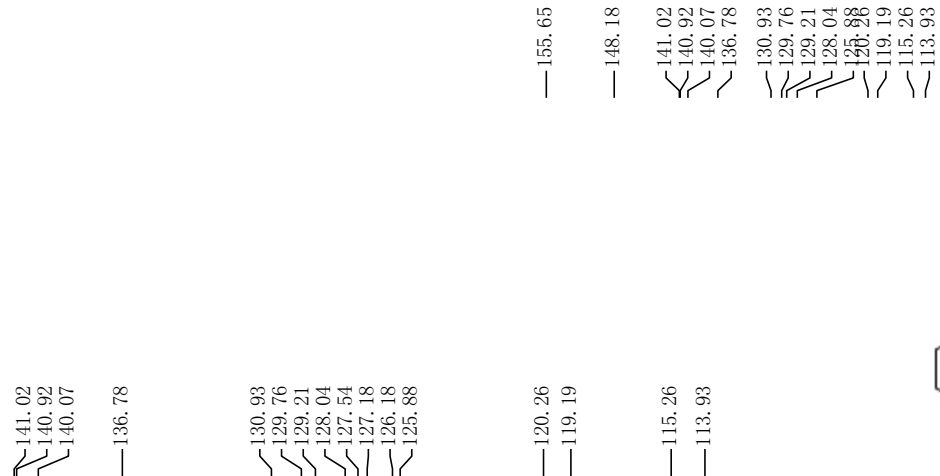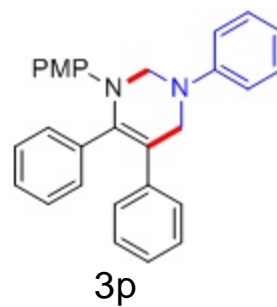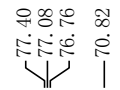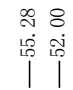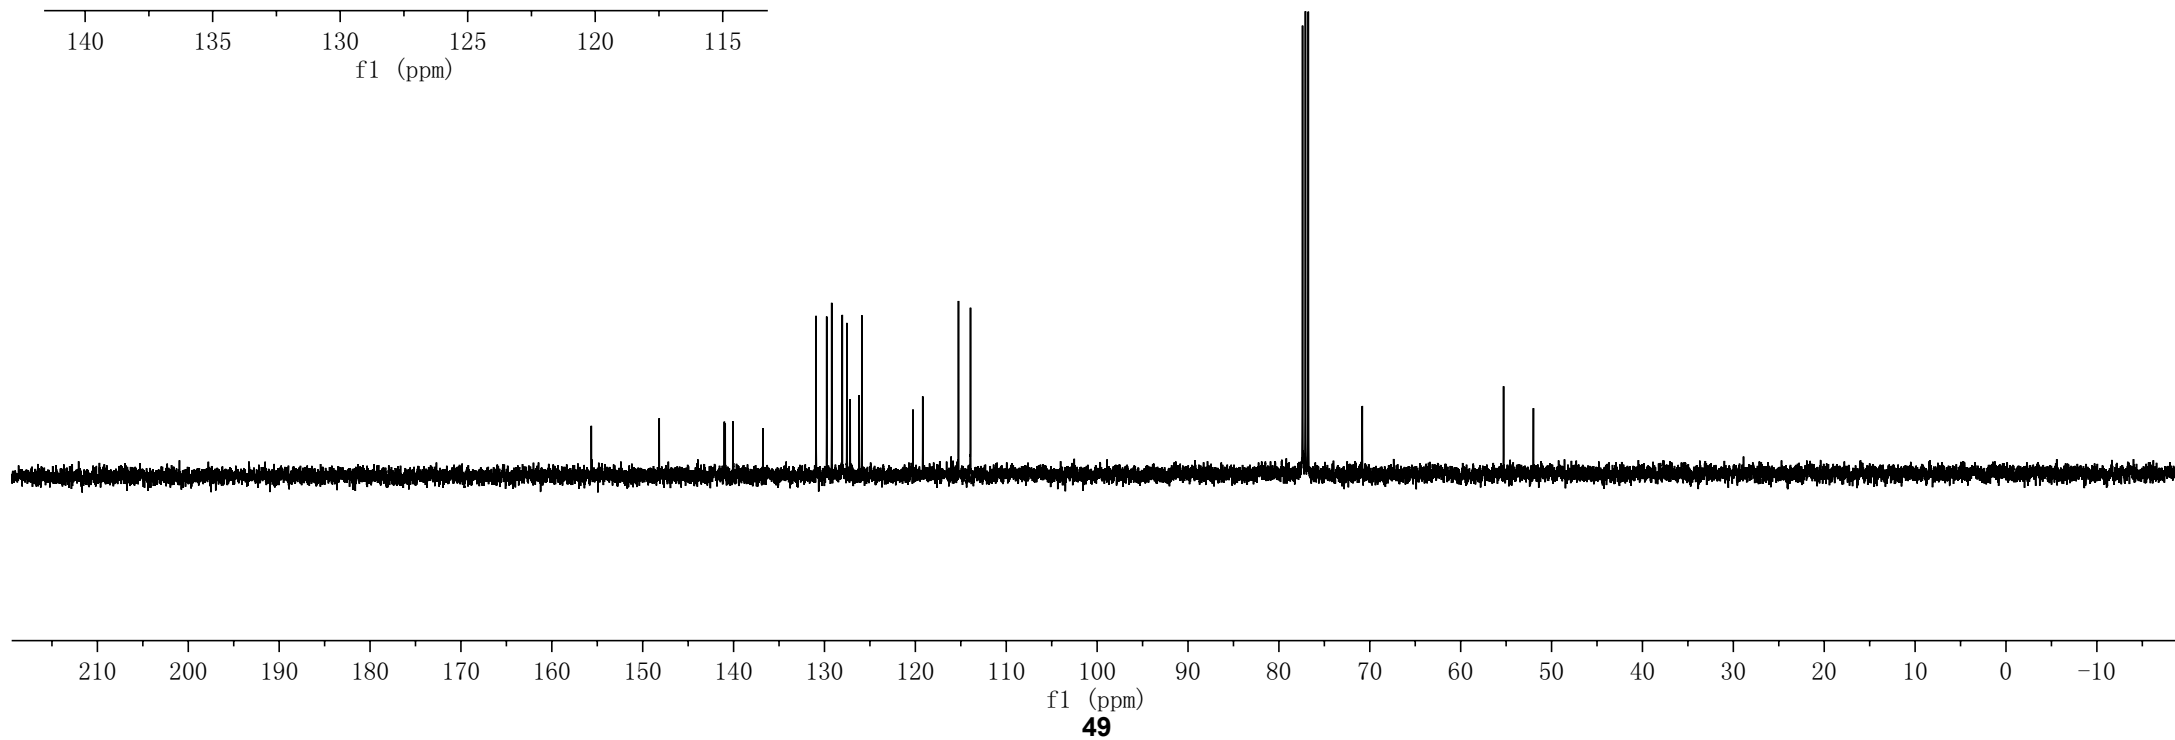



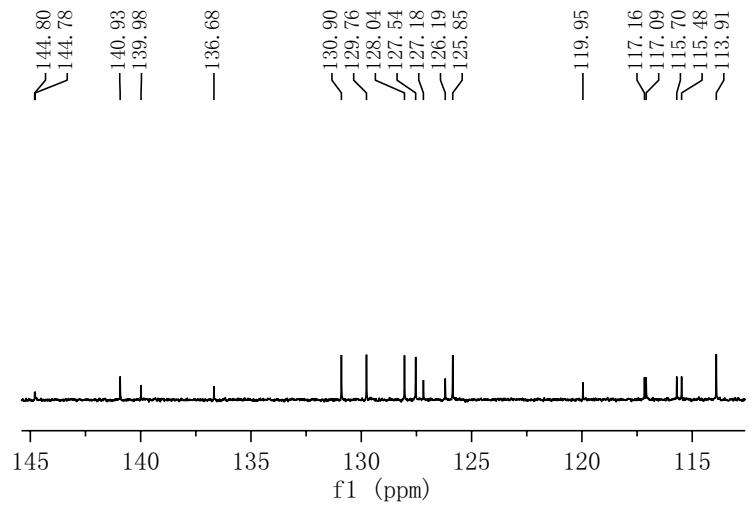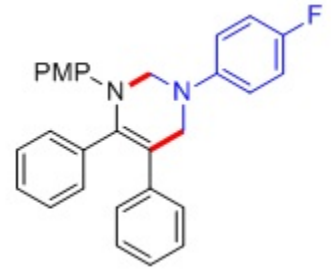

3q

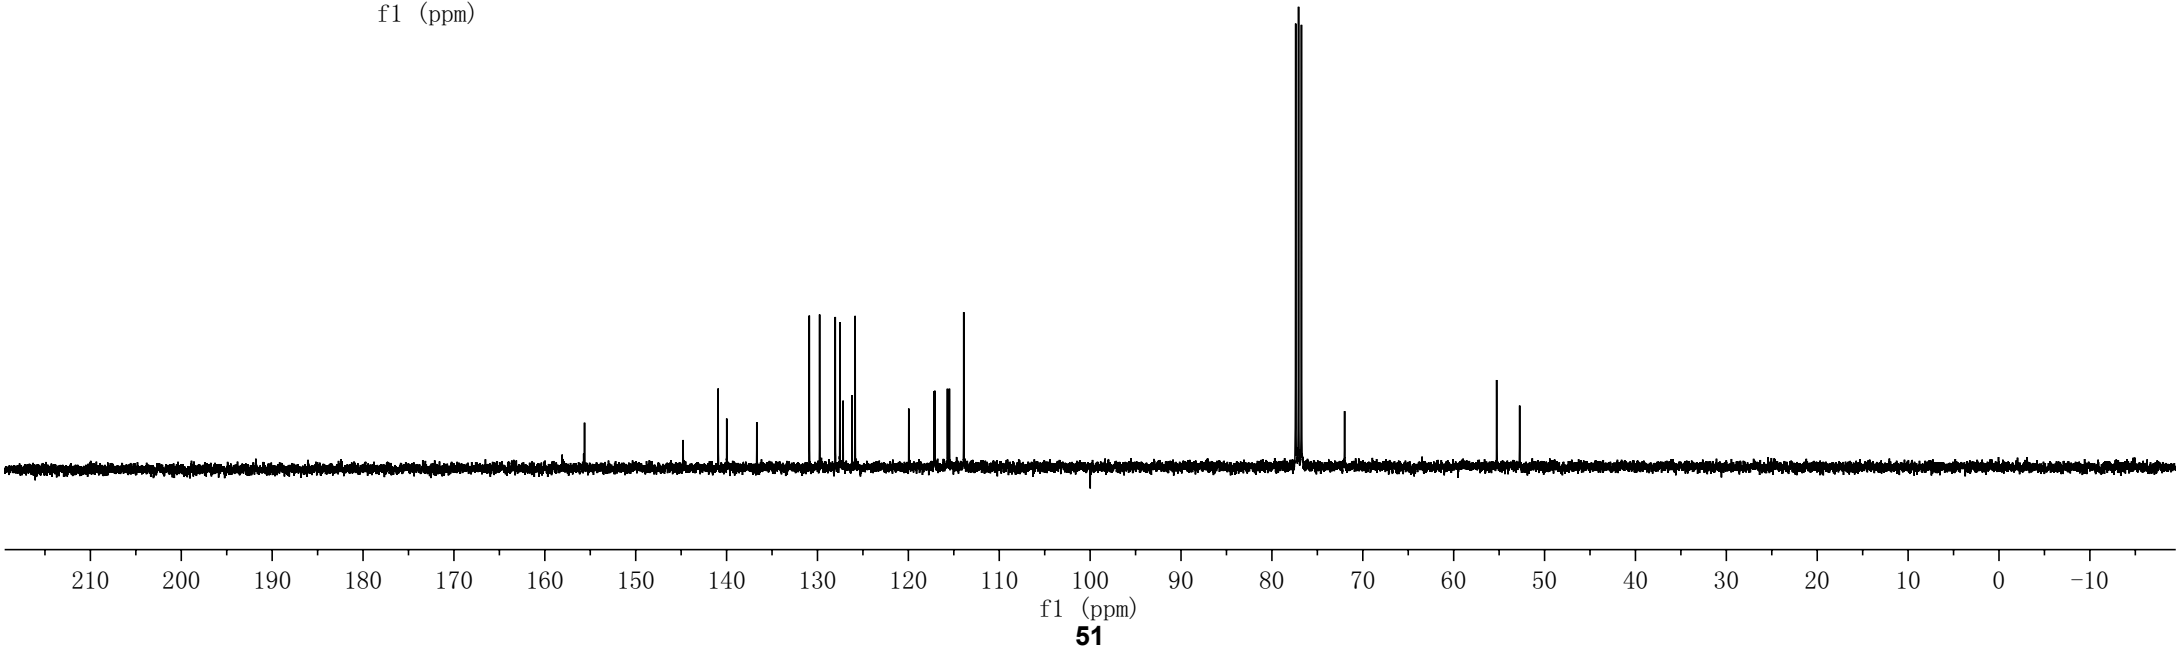

51

7.21  
7.17  
7.16  
7.14  
7.14  
7.13  
7.11  
7.00  
6.98  
6.97  
6.94  
6.92  
6.70  
6.67  
6.64  
6.62

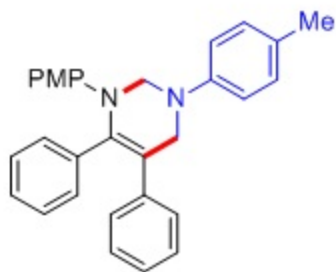

3r

—4.85

—4.16

—3.64

—2.22

—1.50

—0.00

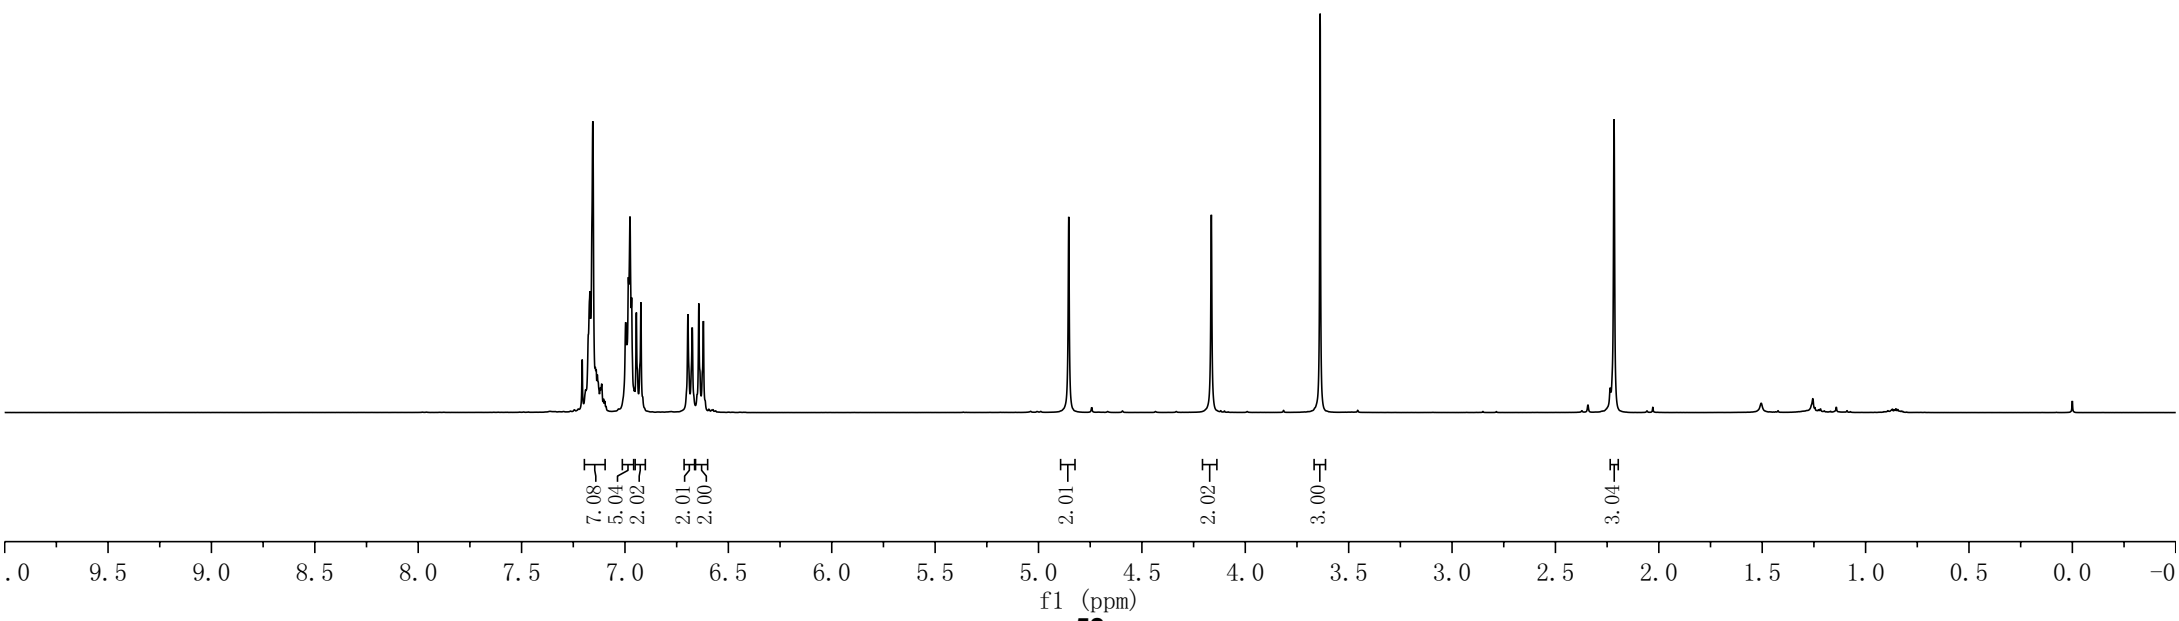

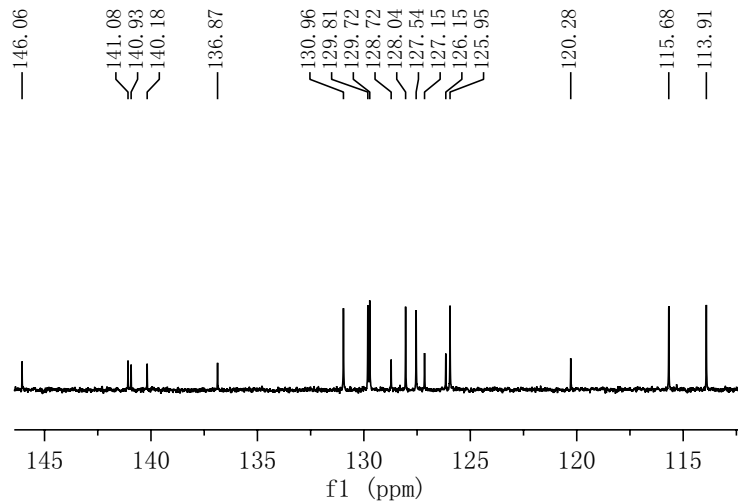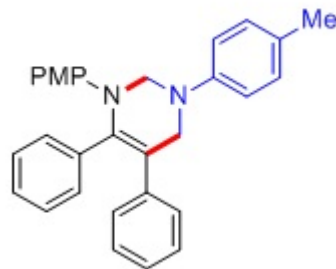

3r

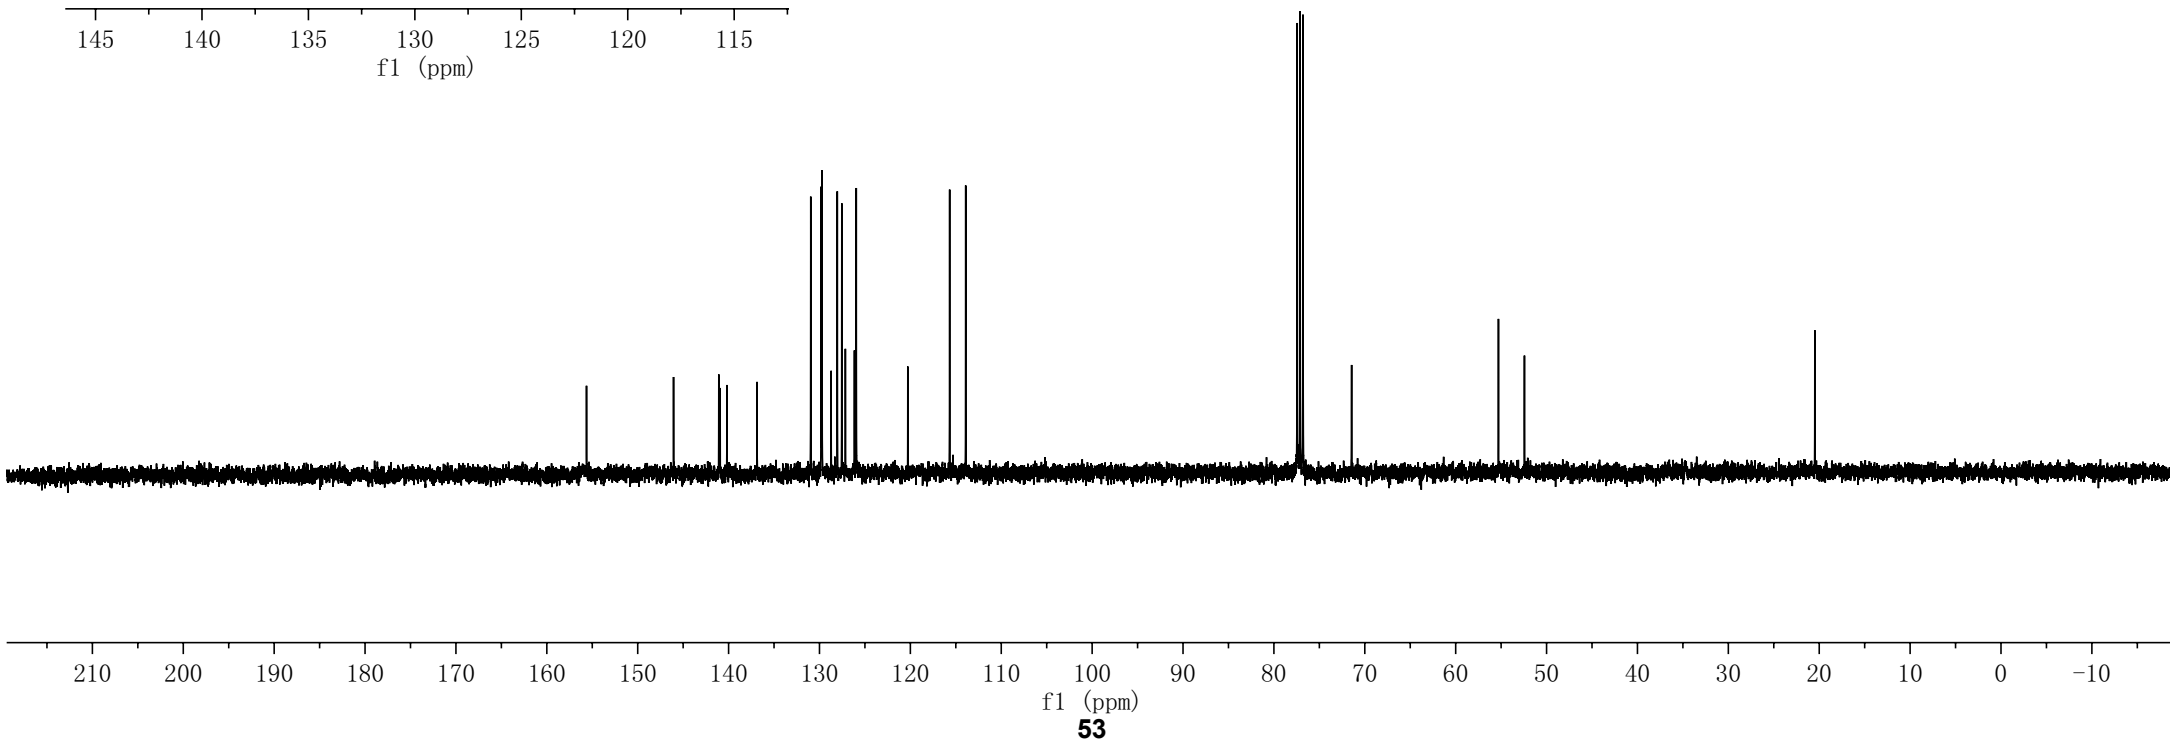

7.25  
7.17  
7.17  
7.16  
7.15  
7.14  
7.13  
7.13  
7.12  
7.11  
7.07  
7.06  
7.05  
7.05  
6.98  
6.98  
6.97  
6.91  
6.90  
6.89  
6.88  
6.87  
6.86  
6.83  
6.82  
6.81  
6.81  
6.71  
6.70  
6.69  
6.68  
6.59  
6.59  
6.57  
6.57

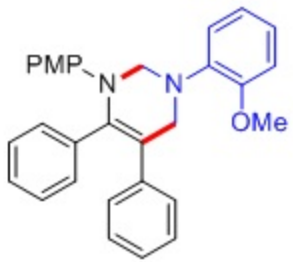

3s

4.87  
4.20  
3.64  
3.44

1.56

0.00

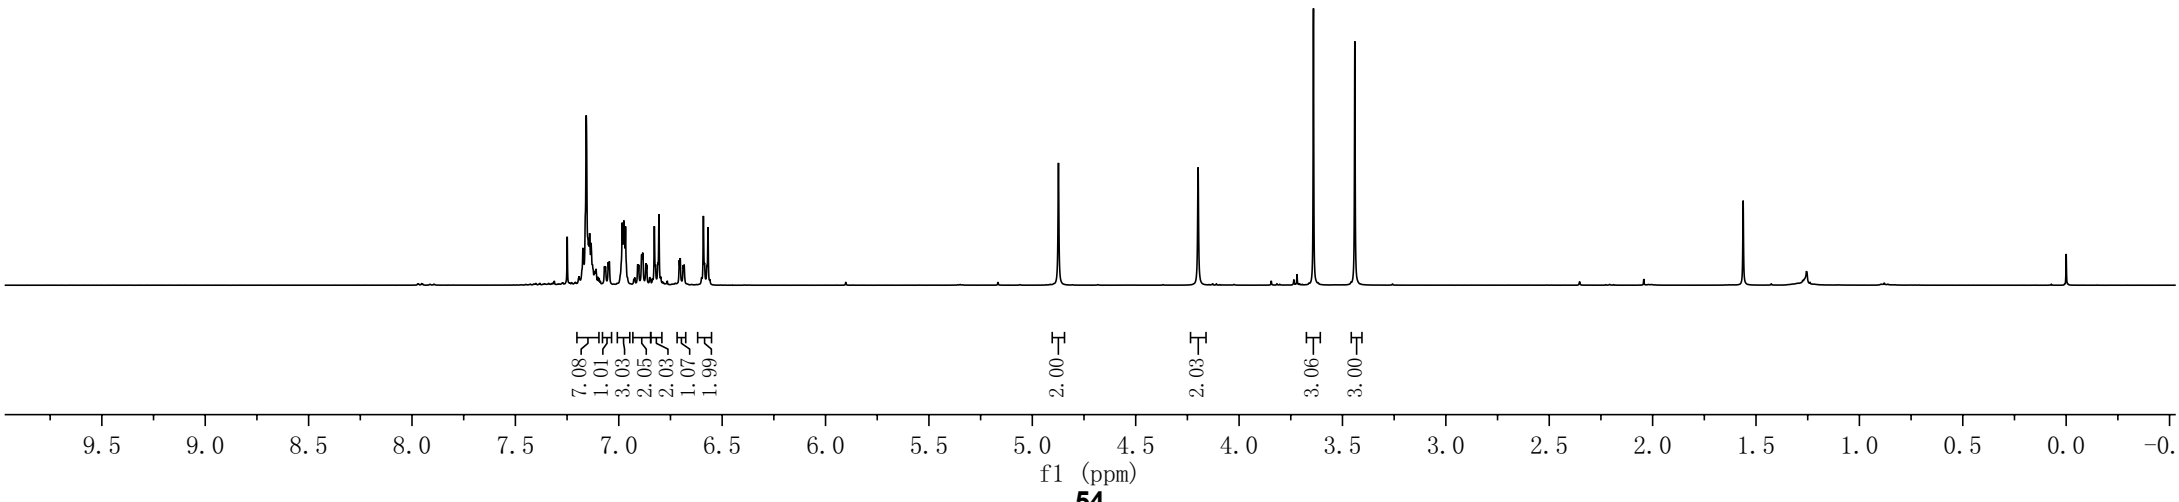

141.32  
140.40  
138.56  
137.71  
136.91

130.97  
129.99  
127.94  
127.45  
126.92  
125.92  
125.74

122.77  
120.74  
119.41  
118.34

113.37  
111.38

154.86  
152.20

141.32  
140.40  
138.56  
137.71  
136.91  
130.97  
129.99  
127.94  
127.45  
126.92  
125.74  
122.77  
119.41  
113.37  
111.38

77.39  
77.07  
76.75  
71.09

55.32  
55.17  
53.49

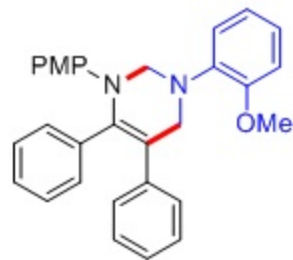

3s

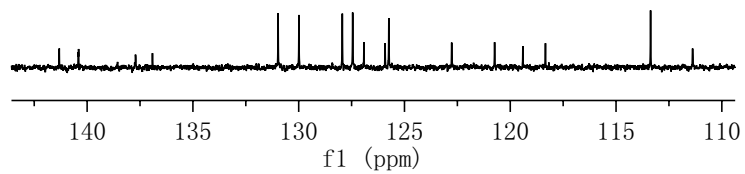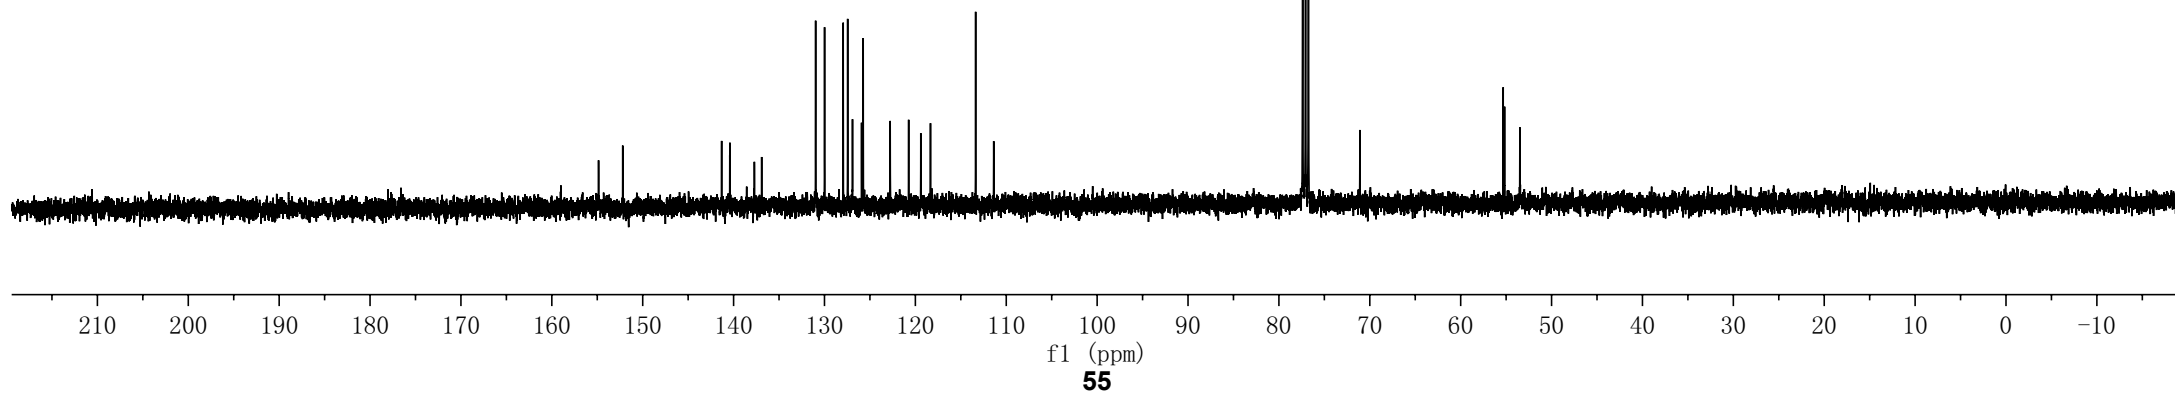

7.25  
7.21  
7.19  
7.17  
7.16  
7.15  
7.14  
7.12  
7.00  
6.99  
6.99  
6.98  
6.94  
6.92  
6.76  
6.75  
6.66  
6.64  
6.55  
6.54  
6.53  
6.52

4.86

4.16

3.67

2.23

1.55

1.25

0.00

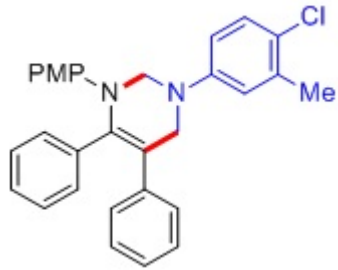

3t

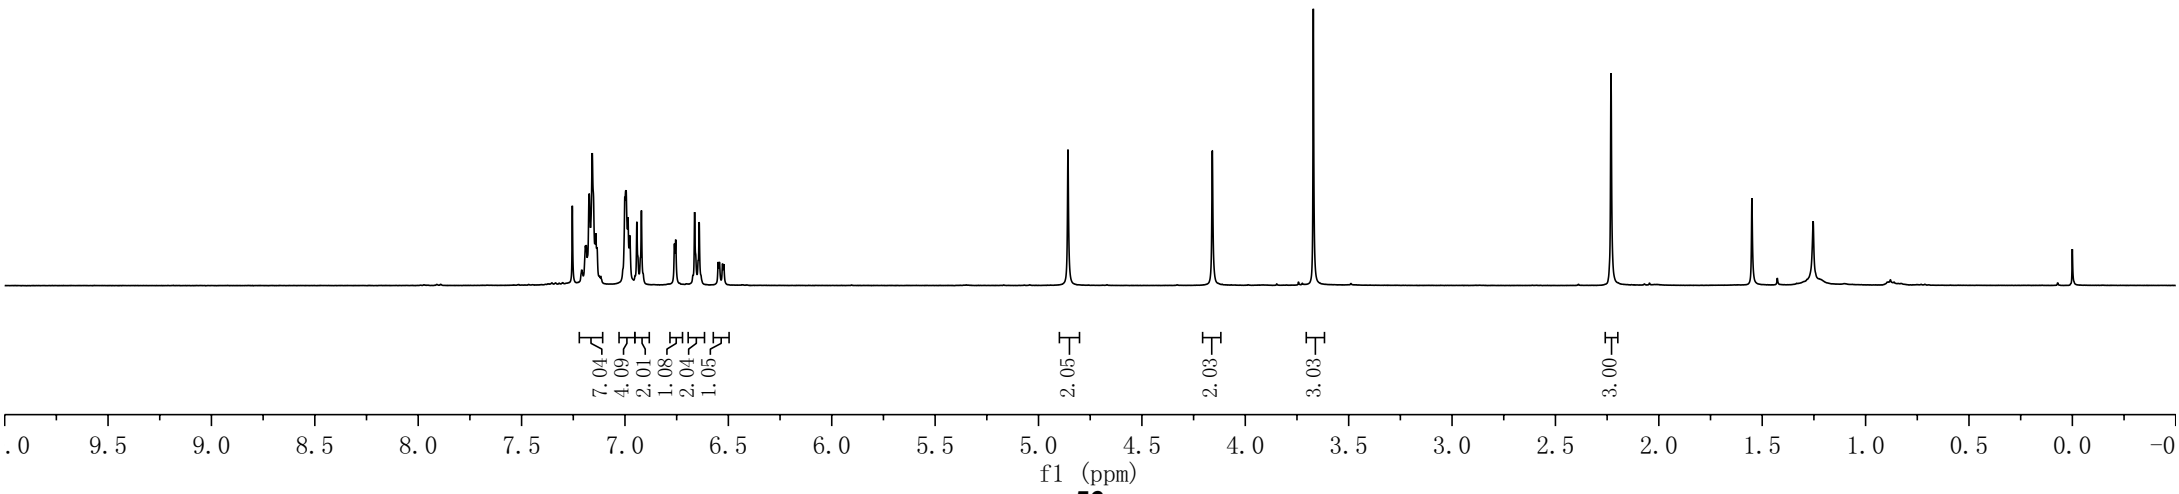

56



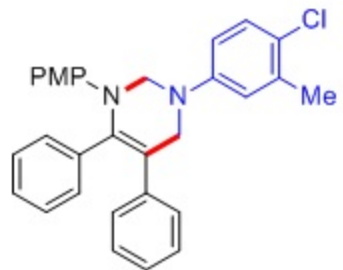

3t

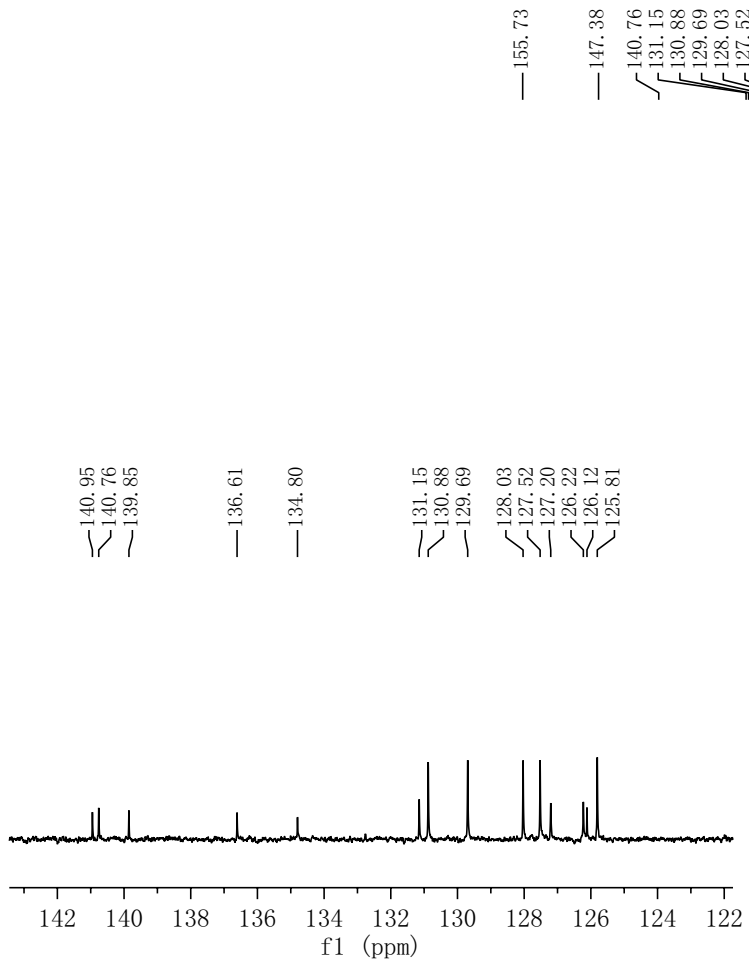

155.73  
147.38  
140.76  
131.15  
130.88  
129.69  
128.03  
127.52  
127.20  
126.22  
126.12  
125.81  
115.61  
113.97  
113.87

77.46  
77.04  
76.62  
70.46

55.28  
52.14

18.96

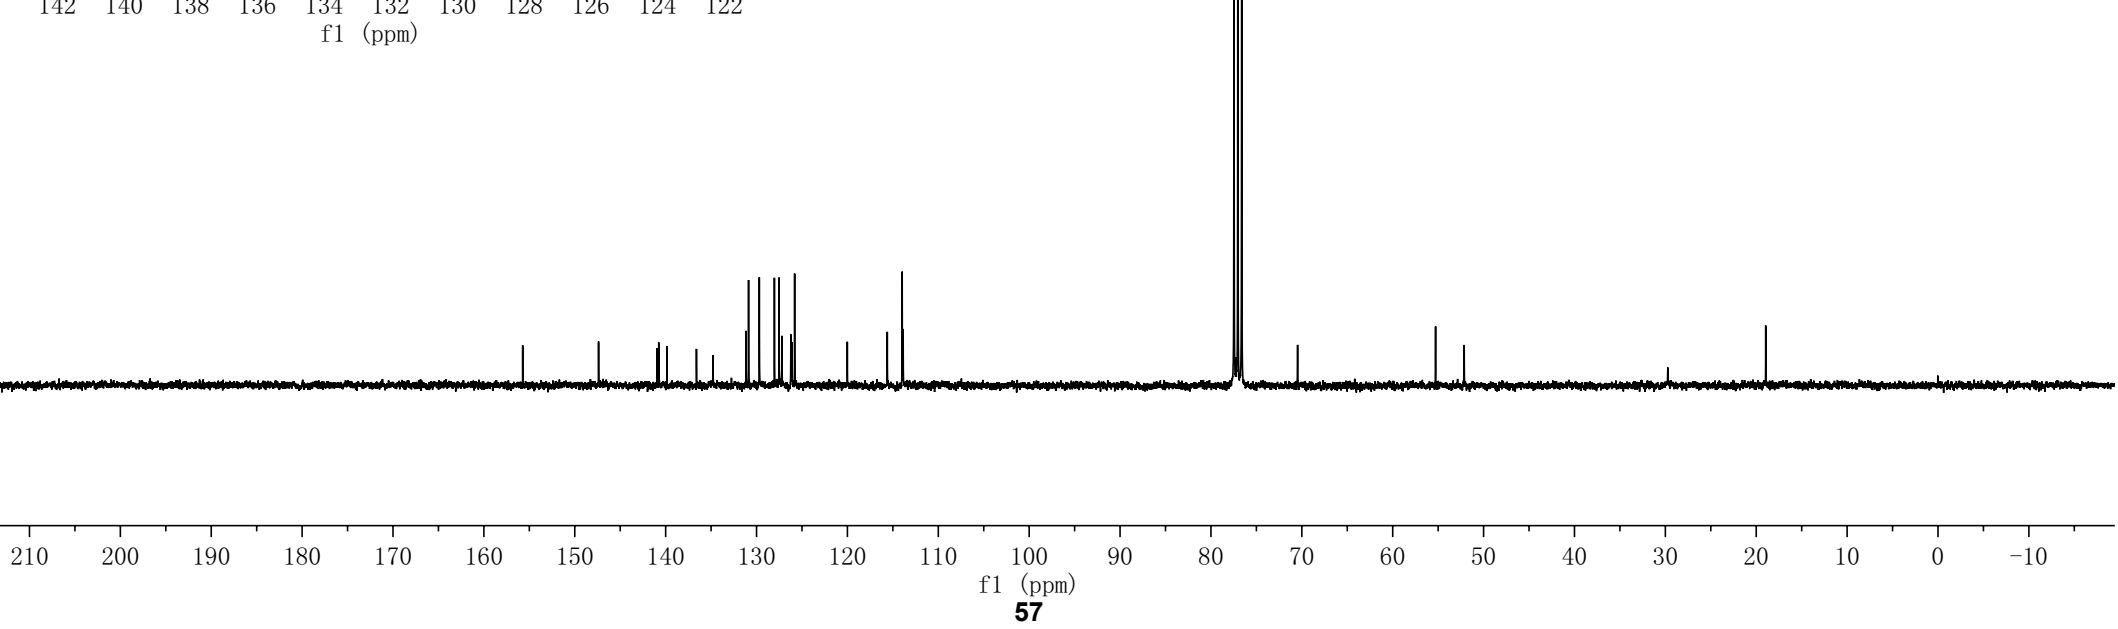

7.24  
7.23  
7.23  
7.21  
7.15  
7.13  
7.10  
7.09  
7.08  
7.07  
7.05  
7.03  
6.97  
6.97  
6.96  
6.94  
6.94  
6.93  
6.84  
6.82  
6.65  
6.63

4.56  
4.21  
3.72  
3.50

1.54

0.00

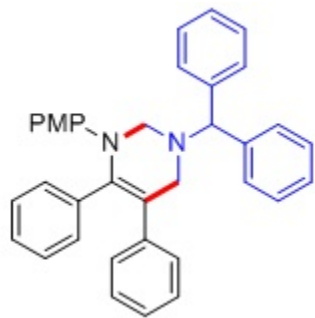

3u

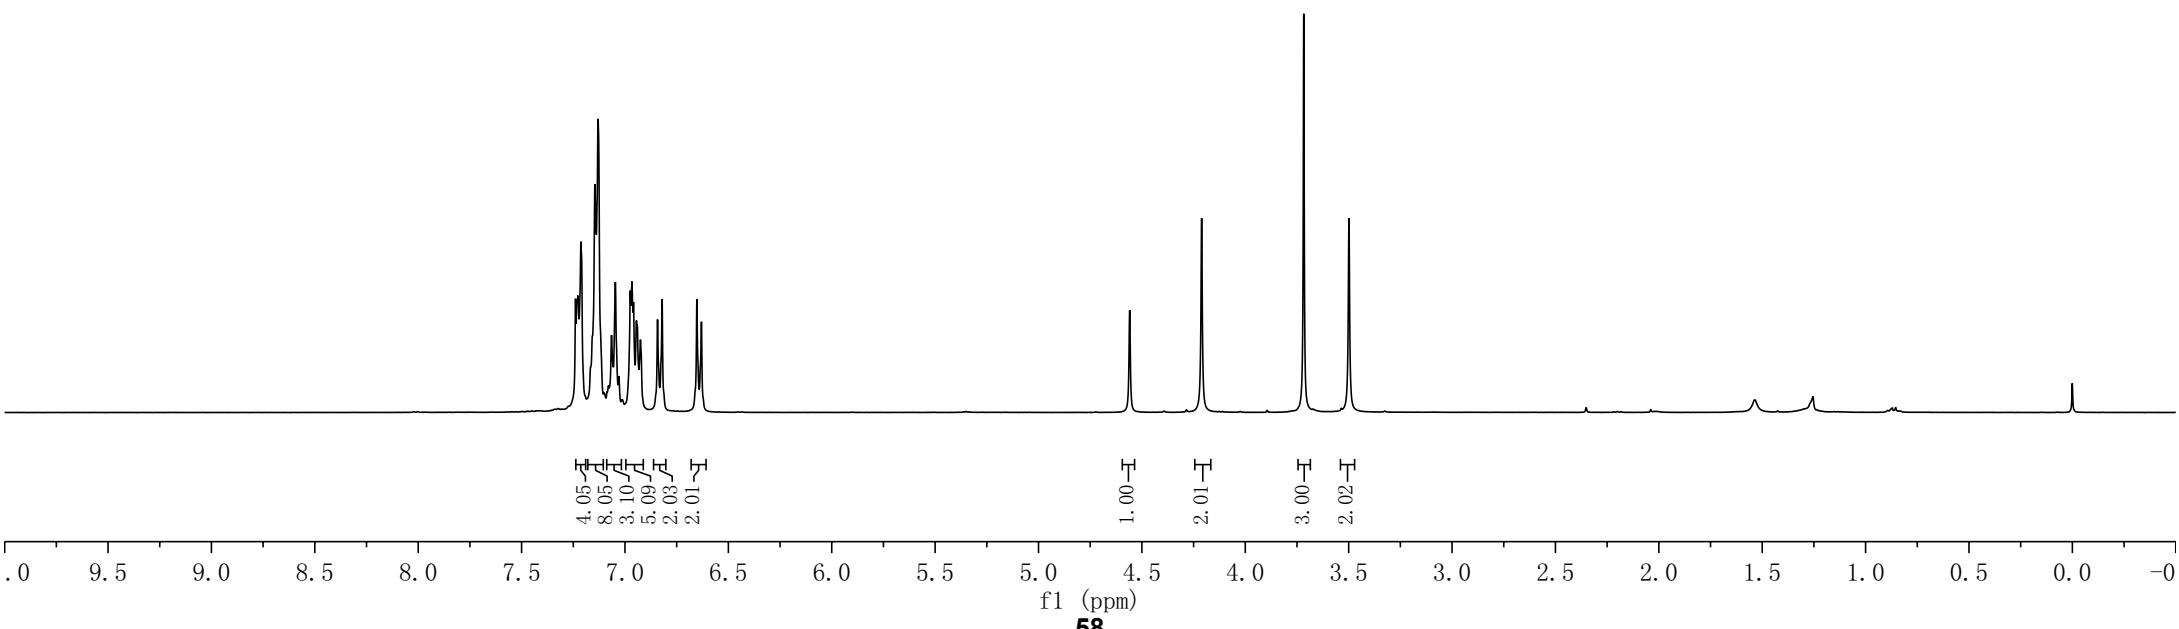

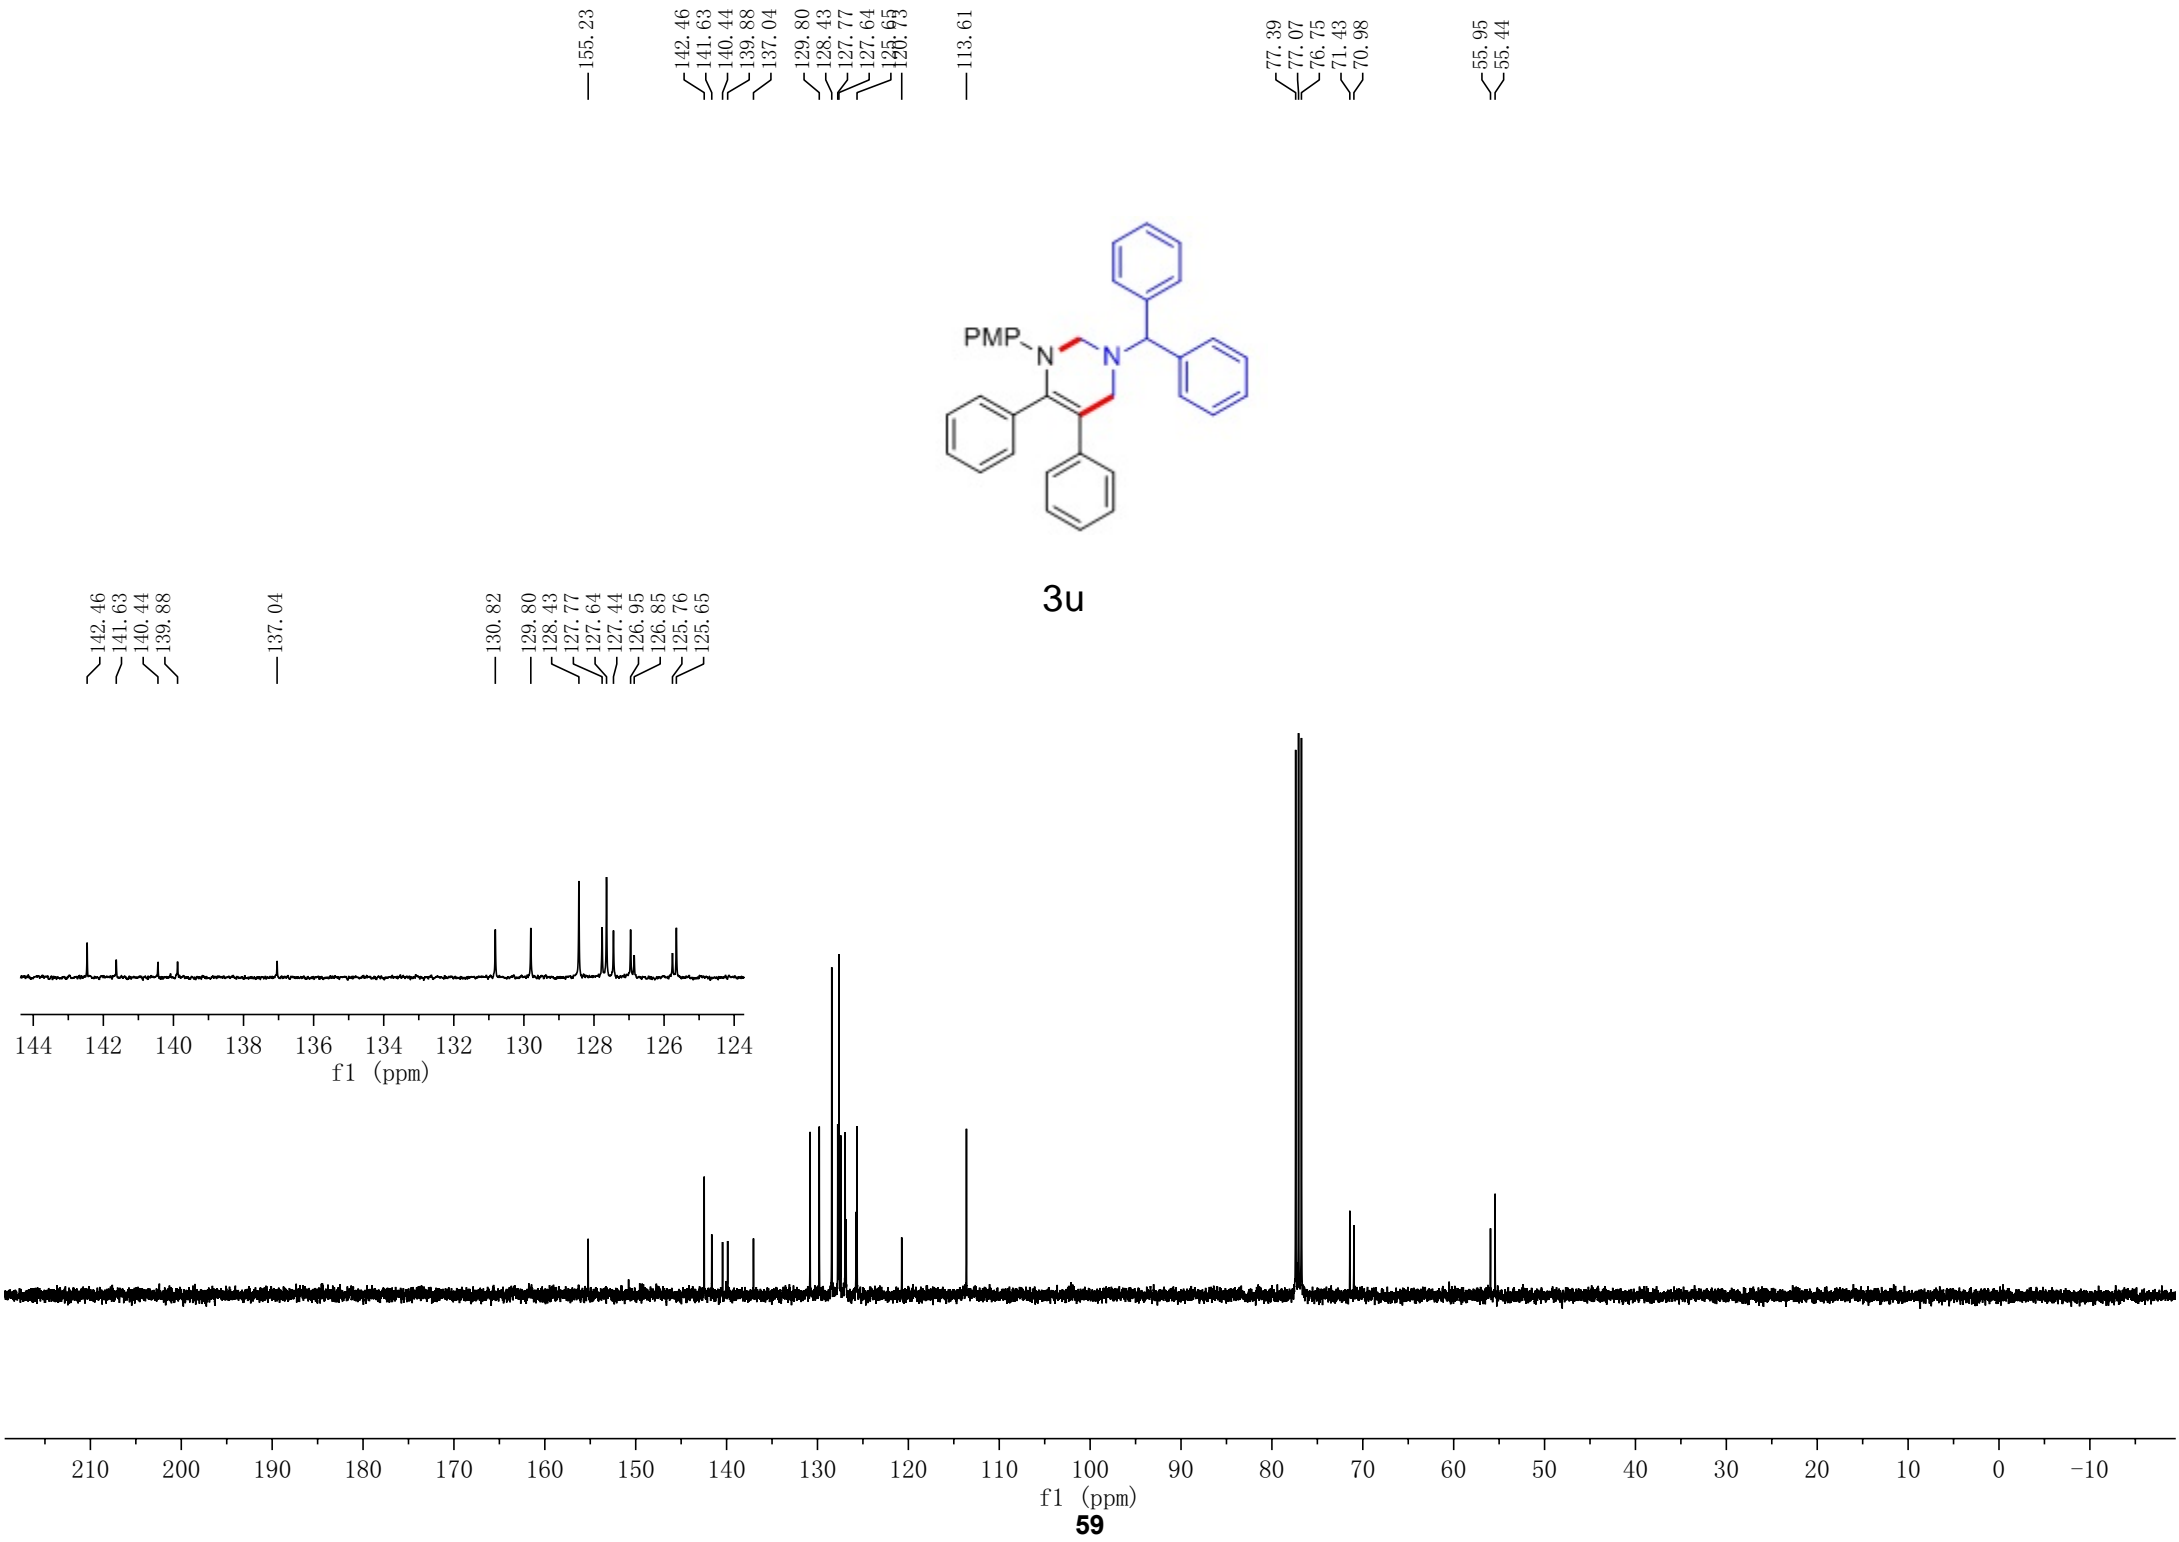

7.24  
7.20  
7.20  
7.18  
7.18  
7.17  
7.16  
7.15  
7.14  
7.14  
7.13  
7.12  
7.11  
7.10  
7.08  
7.06  
6.99  
6.98  
6.98  
6.97  
6.95  
6.86  
6.84  
6.82  
6.77  
6.75  
6.74

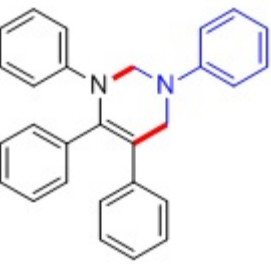

4

5.01

4.21

1.53

1.23

-0.02

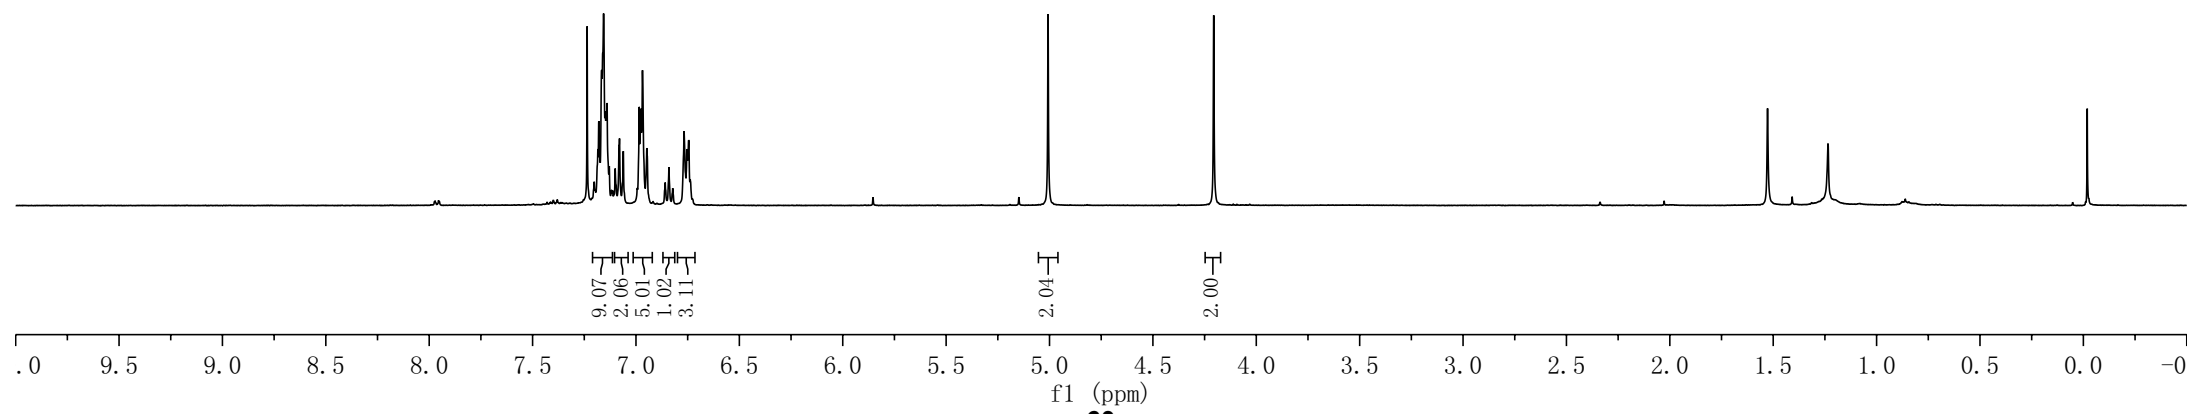

60

148.05  
147.42  
140.39  
139.94  
136.59  
130.80  
129.73  
129.17  
128.60  
128.05  
127.56  
127.19  
126.28  
124.17  
122.81  
121.10  
119.21  
115.25

77.46  
77.04  
76.62  
70.10

52.18

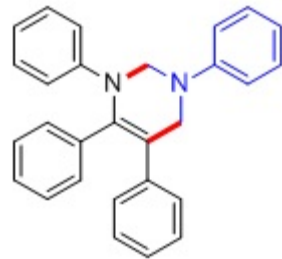

4

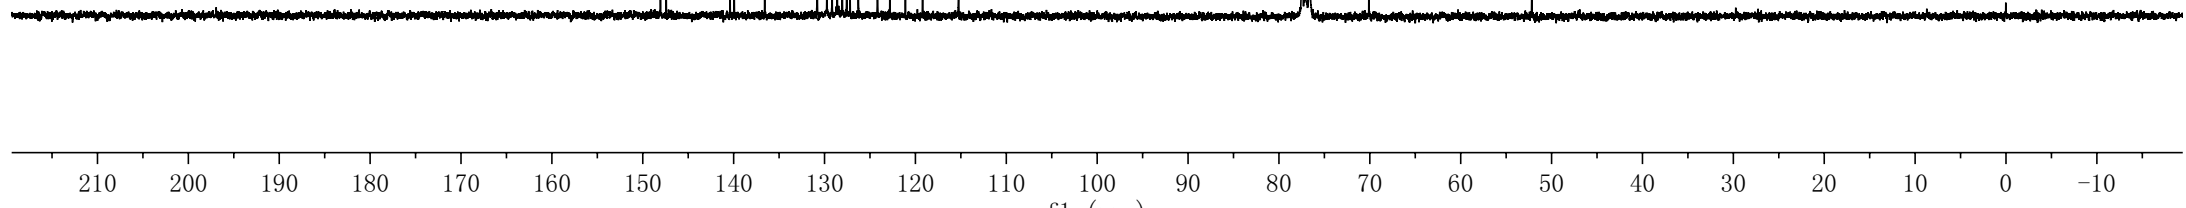

61

7.24  
7.18  
7.17  
7.16  
7.14  
7.12  
7.11  
6.99  
6.98  
6.97  
6.93  
6.92  
6.91  
6.90  
6.89  
6.76  
6.64  
6.61

— 4.81

— 4.13

— 3.72  
— 3.65

— 1.56

— 0.00

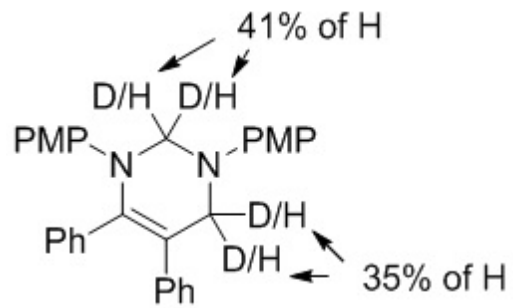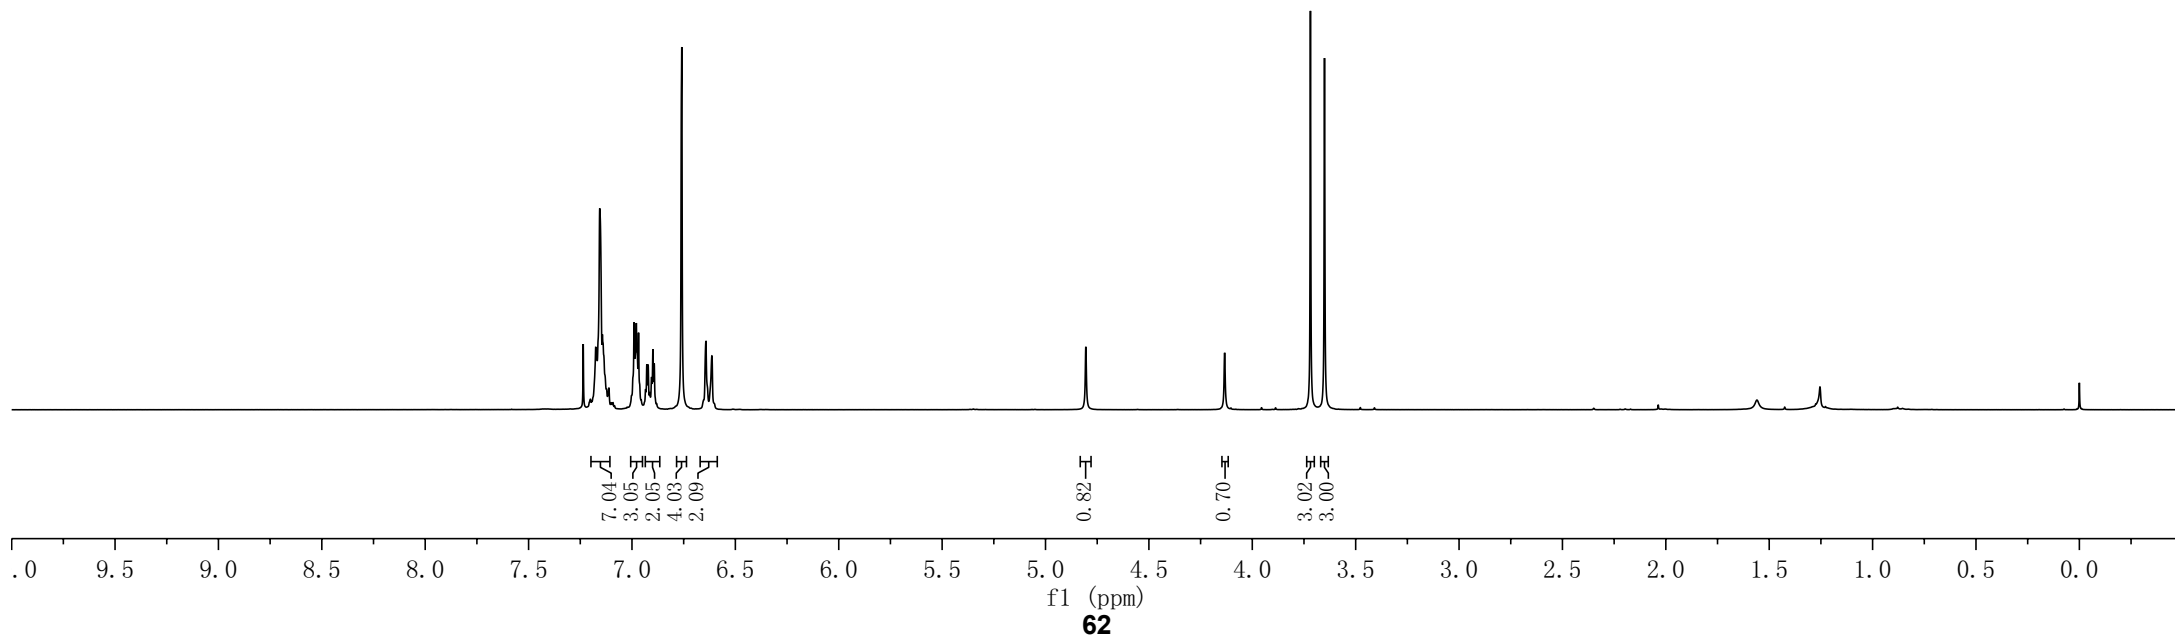

155.52  
153.55  
142.54  
142.51  
141.14  
141.10  
140.87  
140.83  
140.76  
140.18  
136.84  
130.92  
129.80  
127.99  
127.49  
126.88  
119.90  
117.69  
117.64  
114.57  
113.83

77.49  
77.07  
76.64  
72.64  
72.58

55.66  
55.26  
53.08  
53.01

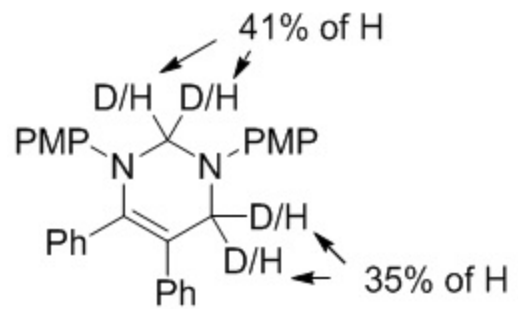

D-3a

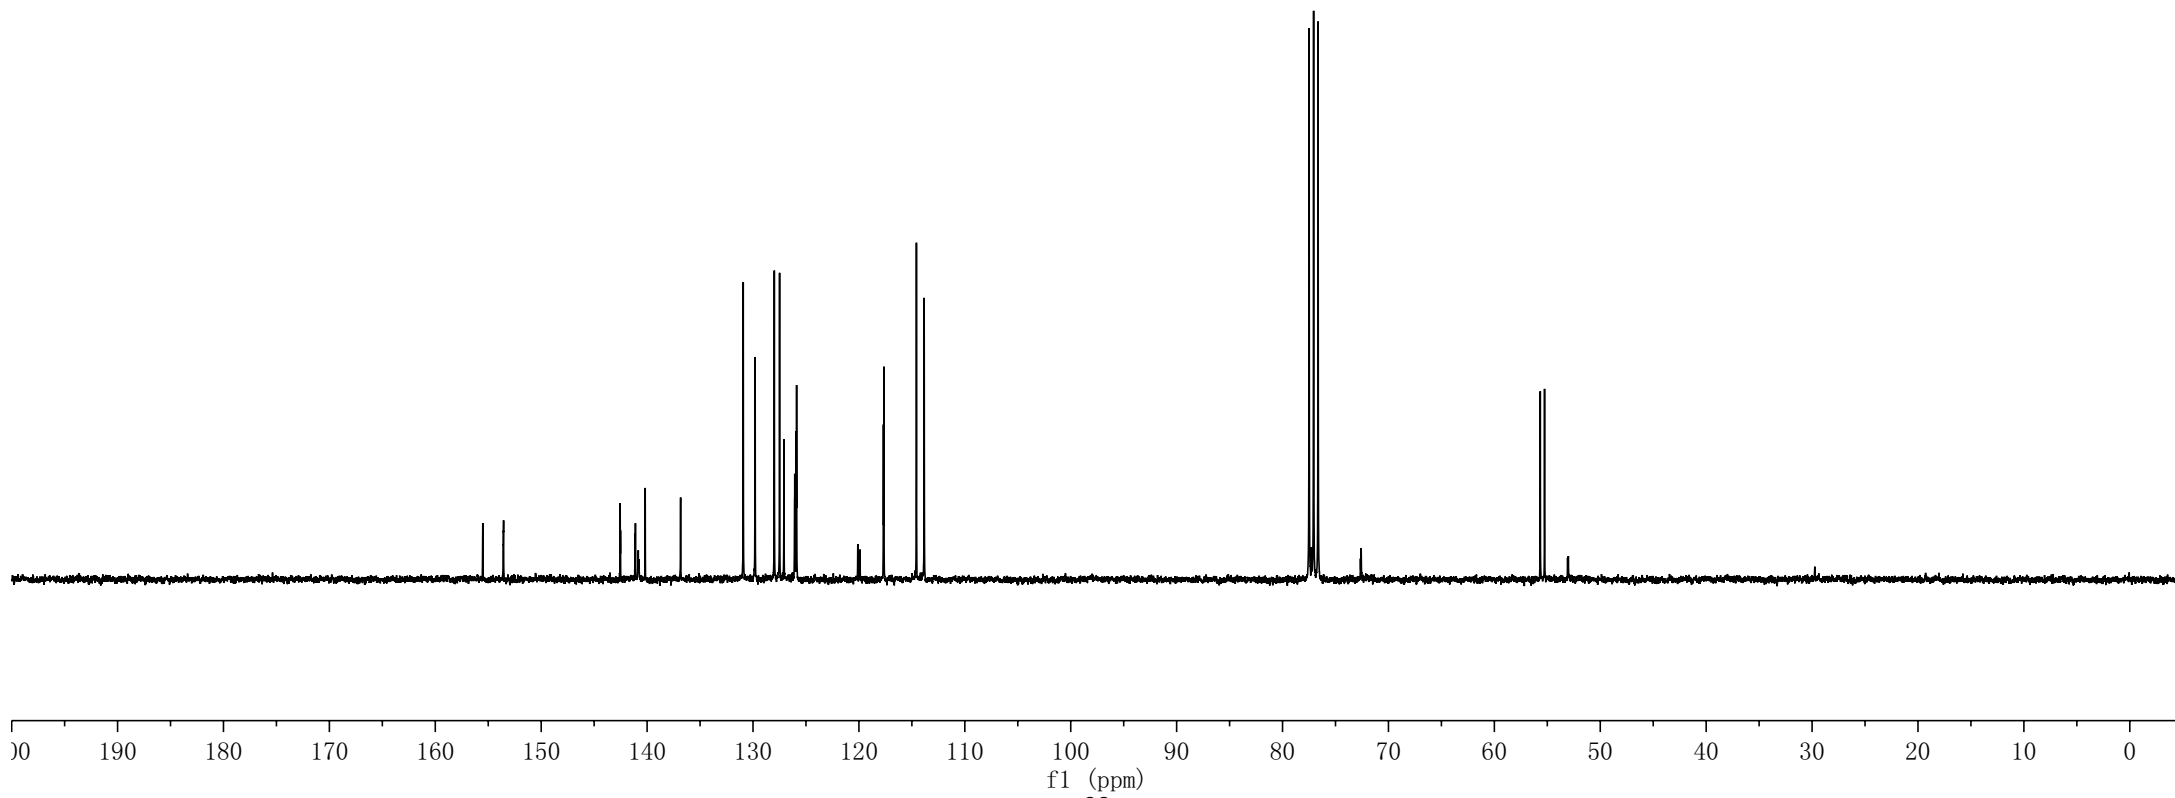

Supplement: c7ra11973a1.pdf [file c7ra11973a1.pdf]
